# Supplementary material for: Speciation genes are more likely to have discordant gene trees
Source: PubMed Central journal article supplement (PMC6121824; doi:10.1002/evl3.77), 2018-08-08

```

Get[NotebookDirectory[] <> "RelaxedIncompatibilityMatrices.m"]

Get[NotebookDirectory[] <> "RelaxedAncestralMatrices.m"]
{{0, 1, 1, 0, 1, 1, 0, 0, 1, 1}, {1, 0, 1, 1, 0, 1, 0, 0, 1, 1},
 {1, 1, 1, 1, 1, 1, 1, 1, 1, 1}, {0, 1, 1, 0, 1, 1, 0, 0, 1, 1},
 {1, 0, 1, 1, 0, 1, 0, 0, 1, 1}, {1, 1, 1, 1, 1, 1, 1, 1, 1, 1},
 {0, 0, 1, 0, 0, 1, 0, 0, 1, 1}, {0, 0, 1, 0, 0, 1, 0, 0, 1, 1},
 {1, 1, 1, 1, 1, 1, 1, 1, 1, 1}, {1, 1, 1, 1, 1, 1, 1, 1, 1, 1}}

trees = {"(S1,S2)S3 int", "(S1,S2)S3 anc", "(S2,S3)S1", "(S1,S3)S2"};
tree$probabilities = {1 - E^-t2, E^-t2/3, E^-t2/3, E^-t2/3};

BranchLength["(S1,S2)S3 int"] = {t1, q[t2], t1, q[t2], t1, t2, 1, t2 - q[t2], 1};
BranchLength["(S1,S2)S3 anc"] = {t1, t2, 1/3, t1, t2, 1/3, t1, t2, 4/3, 1};
BranchLength["(S2,S3)S1"] = {t1, t2, 4/3, t1, t2, 1/3, t1, t2, 1/3, 1};
BranchLength["(S1,S3)S2"] = {t1, t2, 1/3, t1, t2, 4/3, t1, t2, 1/3, 1};

ParseMatrix[treematrix_, incompatibility_] :=
  Boole[Map[SameQ[#, incompatibility] &, MR[treematrix], {2}]]

GetBranchProducts[tree1_, tree2_, incompatibility_] :=
  If[MatrixQ[MR[StringJoin[tree1, ";", tree2]]],
    Simplify[BranchLength[tree1].ParseMatrix[
      StringJoin[tree1, ";", tree2], incompatibility].BranchLength[tree2]],
    Simplify[BranchLength[tree2].ParseMatrix[StringJoin[tree2, ";", tree1],
      incompatibility].BranchLength[tree1]]]

GetBranchProducts$AncOnly[tree1_, tree2_, incompatibility_] :=
  If[MatrixQ[MR[StringJoin[tree1, ";", tree2]]],
    Simplify[BranchLength[tree1].
      (ParseMatrix[StringJoin[tree1, ";", tree2], incompatibility] *
        RDA[StringJoin[tree1, ";", tree2]])].
      BranchLength[tree2]],
    Simplify[BranchLength[tree2].
      (ParseMatrix[StringJoin[tree2, ";", tree1], incompatibility] *
        RDA[StringJoin[tree2, ";", tree1]])].
      BranchLength[tree1]]]

ParseAMatrix[treematrix_, incompatibility_] :=
  Boole[Map[Not[SameQ[#, incompatibility] &, MR[treematrix], {2}]] *
    Boole[Map[SameQ[#, incompatibility] &, MR[treematrix], {2}]]]

```

```

CullDerivedAncestralProducts[tree1_, tree2_, incompatibility_] :=
  If[MatrixQ[AM[StringJoin[tree1, ";", tree2]]],
    Simplify[BranchLength[tree1].ParseAMatrix[
      StringJoin[tree1, ";", tree2], incompatibility].BranchLength[tree2]],
    Simplify[BranchLength[tree2].ParseAMatrix[StringJoin[tree2, ";", tree1],
      incompatibility].BranchLength[tree1]]]

CullDerivedAncestralProducts$AncOnly[tree1_, tree2_, incompatibility_] :=
  If[MatrixQ[AM[StringJoin[tree1, ";", tree2]]],
    Simplify[BranchLength[tree1].
      (ParseAMatrix[StringJoin[tree1, ";", tree2], incompatibility] *
        RDA[StringJoin[tree1, ";", tree2]]).BranchLength[tree2]],
    Simplify[BranchLength[tree2].
      (ParseAMatrix[StringJoin[tree2, ";", tree1], incompatibility] *
        RDA[StringJoin[tree2, ";", tree1]]).BranchLength[tree1]]]

AddDerivedAncestralOrdering[tree1_, tree2_, incompatibility_] :=
  If[MatrixQ[AM[StringJoin[tree1, ";", tree2]]],
    Total[
      ParseAMatrix[StringJoin[tree1, ";", tree2], incompatibility] *
      AM[StringJoin[tree1, ";", tree2]], 2],
    Total[
      ParseAMatrix[StringJoin[tree2, ";", tree1], incompatibility] *
      AM[StringJoin[tree2, ";", tree1]], 2]]

AddDerivedAncestralOrdering$AncOnly[tree1_, tree2_, incompatibility_] :=
  If[MatrixQ[AM[StringJoin[tree1, ";", tree2]]],
    Total[
      RDA[StringJoin[tree1, ";", tree2]] *
      ParseAMatrix[StringJoin[tree1, ";", tree2], incompatibility] *
      AM[StringJoin[tree1, ";", tree2]], 2],
    Total[
      RDA[StringJoin[tree2, ";", tree1]] *
      ParseAMatrix[StringJoin[tree2, ";", tree1], incompatibility] *
      AM[StringJoin[tree2, ";", tree1]], 2]]

fv[x_] = E-x / (1 - E-t2);
fτ[t_] = Simplify[Limit[Integrate[fv[x] / (t2 - x), x], x → t] -
  Limit[Integrate[fv[x] / (t2 - x), x], x → 0]];
g[t2_] = FullSimplify[Integrate[t * fv[t] * Integrate[fτ[x], {x, t, t2}], {t, 0, t2}] +
  Integrate[t * fτ[t] * Integrate[fv[x], {x, t, t2}], {t, 0, t2}];
q[x_] := 1 - (x / (Ex - 1));

```

$$\begin{aligned}
 A_1 &= 1 - (3 \operatorname{Log}[2]) / 4; \\
 A_2 &= 1/2 (-q[t_2] + t_2) (q[t_2] + t_2); \\
 A_3 &= 4/3 - (25 \operatorname{Log}[2]) / 18; \\
 A_4 &= 1/9 (3 - \operatorname{Log}[4]); \\
 A_5 &= 2 * (t_2 - q[t_2]) * g[t_2]; \\
 A_6 &= 1/9 (3 - \operatorname{Log}[2]); \\
 A_7 &= 4/3 - (77 \operatorname{Log}[2]) / 72;
 \end{aligned}$$

---

```

S1xS2$MutationMatrix =
  Outer[GetBranchProducts[###, S1xS2] &, trees, trees] -
  Outer[CullDerivedAncestralProducts[###, S1xS2] &, trees, trees] +
  Outer[AddDerivedAncestralOrdering[###, S1xS2] &, trees, trees];

S1xS2$TreeMatrix = Outer[Times, tree$probabilities, tree$probabilities];

S1xS2$PMatrix = S1xS2$MutationMatrix * S1xS2$TreeMatrix;

S1xS2$MarginalConcordant =
  Simplify[(1/2) (Total[S1xS2$PMatrix[[1]]] + Total[S1xS2$PMatrix[[2]]] +
    Total[S1xS2$PMatrix[[All, 1]]] + Total[S1xS2$PMatrix[[All, 2]]])];
S1xS2$MarginalDiscordant =
  Simplify[(1/2) (Total[S1xS2$PMatrix[[3]]] + Total[S1xS2$PMatrix[[4]]] +
    Total[S1xS2$PMatrix[[All, 3]]] + Total[S1xS2$PMatrix[[All, 4]]])];

$Aborted

$Aborted

S1xS2$ConcordanceRatio = FullSimplify[
  S1xS2$MarginalConcordant / (S1xS2$MarginalConcordant + S1xS2$MarginalDiscordant)]
- 4 Log[2] + 324 e2 t2 (1 + t1)2 - 72 et2 (1 + t1) (4 + 3 t1 + 3 t2)
-----
- 36 - 93 Log[2] + 324 e2 t2 (1 + t1)2

```

```
ContourPlot[S1xS2$ConcordanceRatio /  $\left(1 - \frac{2 e^{-t_2}}{3}\right)$ ,
  {t2, 0, 3}, {t1, 0, 3}, PlotLegends -> Automatic,
  Contours -> {0.55, 0.65, 0.75, 0.85, 0.95, 1, 1.05, 1.15, 1.25, 1.35, 1.45},
  ColorFunctionScaling -> False,
  ColorFunction -> ColorData[{"ThermometerColors", {1.6, 0.4}}]]
```

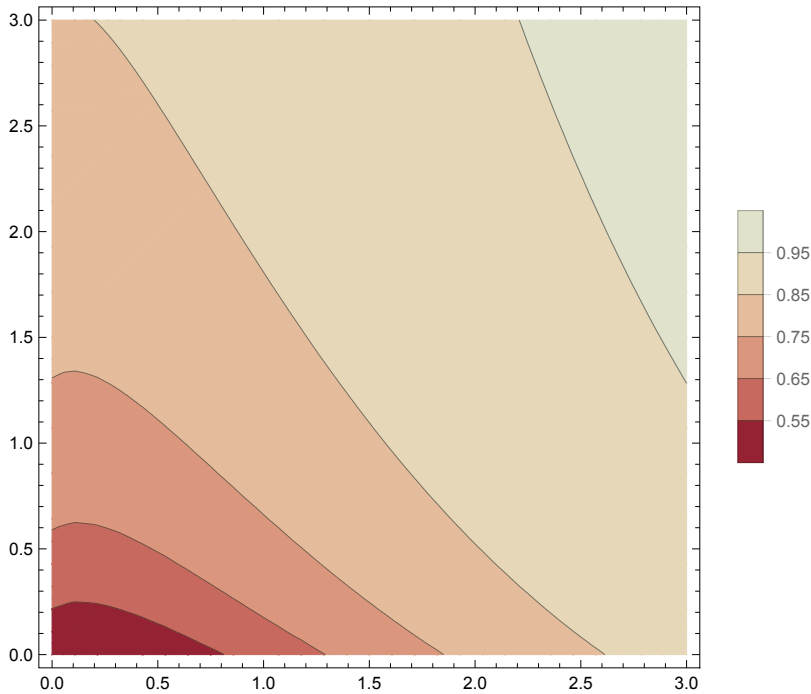

```
Limit[Limit[S1xS2$ConcordanceRatio /  $\left(1 - \frac{2 e^{-t_2}}{3}\right)$ , t1 -> 0], t2 -> 0]
```

$$\frac{3 (36 - 4 \text{Log}[2])}{288 - 93 \text{Log}[2]}$$

$$N\left[\frac{3 (36 - 4 \text{Log}[2])}{288 - 93 \text{Log}[2]}\right]$$

0.445931

1 - 0.4459310745427609`

0.554069

```
S1xS2$S1xS3$MutationMatrix =
```

```
  Outer[GetBranchProducts[###, S1xS2$S1xS3] &, trees, trees] -
  Outer[CullDerivedAncestralProducts[###, S1xS2$S1xS3] &, trees, trees] +
  Outer[AddDerivedAncestralOrdering[###, S1xS2$S1xS3] &, trees, trees];
```

```
S1xS2$S1xS3$TreeMatrix = Outer[Times, tree$probabilities, tree$probabilities];
```

```
S1xS2$S1xS3$PMatrix = S1xS2$S1xS3$MutationMatrix * S1xS2$S1xS3$TreeMatrix;
```

```

S1xS2$S1xS3$MarginalConcordant =
  Simplify[
    (1/2) (Total[S1xS2$S1xS3$PMatrix[[1]]] + Total[S1xS2$S1xS3$PMatrix[[2]]] +
      Total[S1xS2$S1xS3$PMatrix[[All, 1]]] +
      Total[S1xS2$S1xS3$PMatrix[[All, 2]]]);
S1xS2$S1xS3$MarginalDiscordant =
  Simplify[
    (1/2) (Total[S1xS2$S1xS3$PMatrix[[3]]] + Total[S1xS2$S1xS3$PMatrix[[4]]] +
      Total[S1xS2$S1xS3$PMatrix[[All, 3]]] + Total[S1xS2$S1xS3$PMatrix[[All, 4]]]);
S1xS2$S1xS3$ConcordanceRatio = FullSimplify[S1xS2$S1xS3$MarginalConcordant /
  (S1xS2$S1xS3$MarginalConcordant + S1xS2$S1xS3$MarginalDiscordant)]
1 -  $\frac{2 e^{-t_2} (4 + 3 t_1 + 3 t_2)}{9 (1 + t_1)}$ 
S1xS2$S2xS3$MutationMatrix =
  Outer[GetBranchProducts[###, S1xS2$S2xS3] &, trees, trees] -
  Outer[CullDerivedAncestralProducts[###, S1xS2$S2xS3] &, trees, trees] +
  Outer[AddDerivedAncestralOrdering[###, S1xS2$S2xS3] &, trees, trees];
S1xS2$S2xS3$TreeMatrix = Outer[Times, tree$probabilities, tree$probabilities];
S1xS2$S2xS3$PMatrix = S1xS2$S2xS3$MutationMatrix * S1xS2$S2xS3$TreeMatrix;
S1xS2$S2xS3$MarginalConcordant =
  Simplify[
    (1/2) (Total[S1xS2$S2xS3$PMatrix[[1]]] + Total[S1xS2$S2xS3$PMatrix[[2]]] +
      Total[S1xS2$S2xS3$PMatrix[[All, 1]]] +
      Total[S1xS2$S2xS3$PMatrix[[All, 2]]]);
S1xS2$S2xS3$MarginalDiscordant =
  Simplify[
    (1/2) (Total[S1xS2$S2xS3$PMatrix[[3]]] + Total[S1xS2$S2xS3$PMatrix[[4]]] +
      Total[S1xS2$S2xS3$PMatrix[[All, 3]]] + Total[S1xS2$S2xS3$PMatrix[[All, 4]]]);
S1xS2$S2xS3$ConcordanceRatio = FullSimplify[S1xS2$S2xS3$MarginalConcordant /
  (S1xS2$S2xS3$MarginalConcordant + S1xS2$S2xS3$MarginalDiscordant)];
S1xS2$S1xS3$ConcordanceRatio == S1xS2$S2xS3$ConcordanceRatio
True

```

```
ContourPlot[S1xS2$S1xS3$ConcordanceRatio /  $\left(1 - \frac{2e^{-t_2}}{3}\right)$ ,
  {t2, 0, 3}, {t1, 0, 3}, PlotLegends -> Automatic,
  Contours -> {0.55, 0.65, 0.75, 0.85, 0.95, 1, 1.05, 1.15, 1.25, 1.35, 1.45},
  ColorFunctionScaling -> False,
  ColorFunction -> ColorData[{"ThermometerColors", {1.6, 0.4}}]]
```

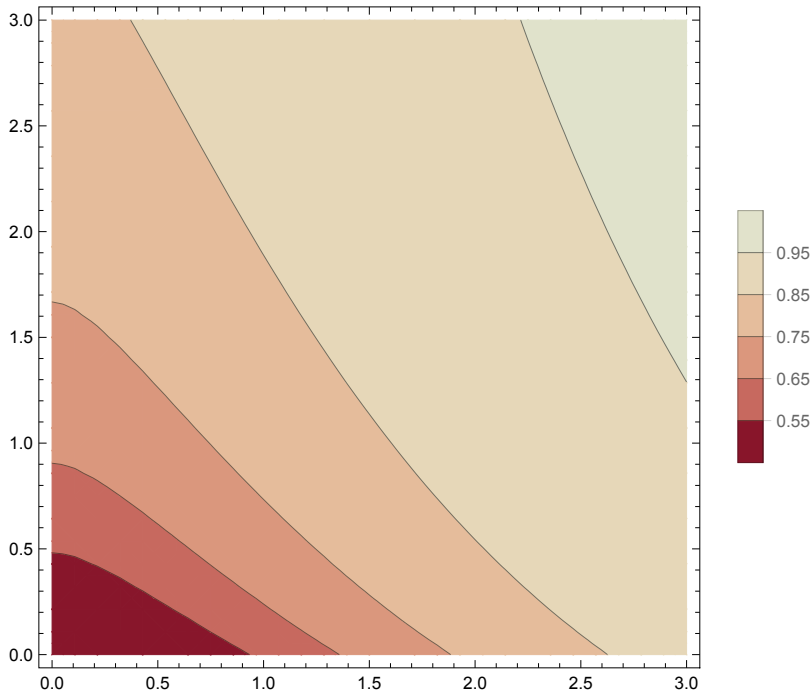

```
Limit[Limit[S1xS2$S1xS3$ConcordanceRatio /  $\left(1 - \frac{2e^{-t_2}}{3}\right)$ , t1 -> 0], t2 -> 0]
```

$$\frac{1}{3}$$


---

```
S1xS3$MutationMatrix =
```

```
  Outer[GetBranchProducts[###, S1xS3] &, trees, trees] -
  Outer[CullDerivedAncestralProducts[###, S1xS3] &, trees, trees] +
  Outer[AddDerivedAncestralOrdering[###, S1xS3] &, trees, trees];
```

```
S1xS3$TreeMatrix = Outer[Times, tree$probabilities, tree$probabilities];
```

```
S1xS3$PMatrix = S1xS3$MutationMatrix * S1xS3$TreeMatrix;
```

```
S1xS3$MarginalConcordant =
```

```
  Simplify[(1/2) (Total[S1xS3$PMatrix[[1]]] + Total[S1xS3$PMatrix[[2]]] +
    Total[S1xS3$PMatrix[[All, 1]]] + Total[S1xS3$PMatrix[[All, 2]]])];
```

```
S1xS3$MarginalDiscordant =
```

```
  Simplify[(1/2) (Total[S1xS3$PMatrix[[3]]] + Total[S1xS3$PMatrix[[4]]] +
    Total[S1xS3$PMatrix[[All, 3]]] + Total[S1xS3$PMatrix[[All, 4]]])];
```

```

S1xS3$ConcordanceRatio = Simplify[S1xS3$MarginalConcordant /
  (S1xS3$MarginalConcordant + S1xS3$MarginalDiscordant)];
S2xS3$MutationMatrix =
  Outer[GetBranchProducts[###, S2xS3] &, trees, trees] -
  Outer[CullDerivedAncestralProducts[###, S2xS3] &, trees, trees] +
  Outer[AddDerivedAncestralOrdering[###, S2xS3] &, trees, trees];
S2xS3$TreeMatrix = Outer[Times, tree$probabilities, tree$probabilities];
S2xS3$PMatrix = S2xS3$MutationMatrix * S2xS3$TreeMatrix;
S2xS3$MarginalConcordant =
  Simplify[(1/2) (Total[S2xS3$PMatrix[[1]]] + Total[S2xS3$PMatrix[[2]]] +
    Total[S2xS3$PMatrix[[All, 1]]] + Total[S2xS3$PMatrix[[All, 2]]])];
S2xS3$MarginalDiscordant =
  Simplify[(1/2) (Total[S2xS3$PMatrix[[3]]] + Total[S2xS3$PMatrix[[4]]] +
    Total[S2xS3$PMatrix[[All, 3]]] + Total[S2xS3$PMatrix[[All, 4]]])];
S2xS3$ConcordanceRatio = Simplify[S2xS3$MarginalConcordant /
  (S2xS3$MarginalConcordant + S2xS3$MarginalDiscordant)];
S1xS3$ConcordanceRatio == S2xS3$ConcordanceRatio
True

```

```
ContourPlot[S1xS3$ConcordanceRatio /  $\left(1 - \frac{2 e^{-t_2}}{3}\right)$ ,
  {t2, 0, 3}, {t1, 0, 3}, PlotLegends -> Automatic,
  PlotRange -> All,
  Contours -> {0.55, 0.65, 0.75, 0.85, 0.95, 1, 1.05, 1.15, 1.25, 1.35, 1.45},
  ColorFunctionScaling -> False,
  ColorFunction -> ColorData[{"ThermometerColors", {1.6, 0.4}}]]
```

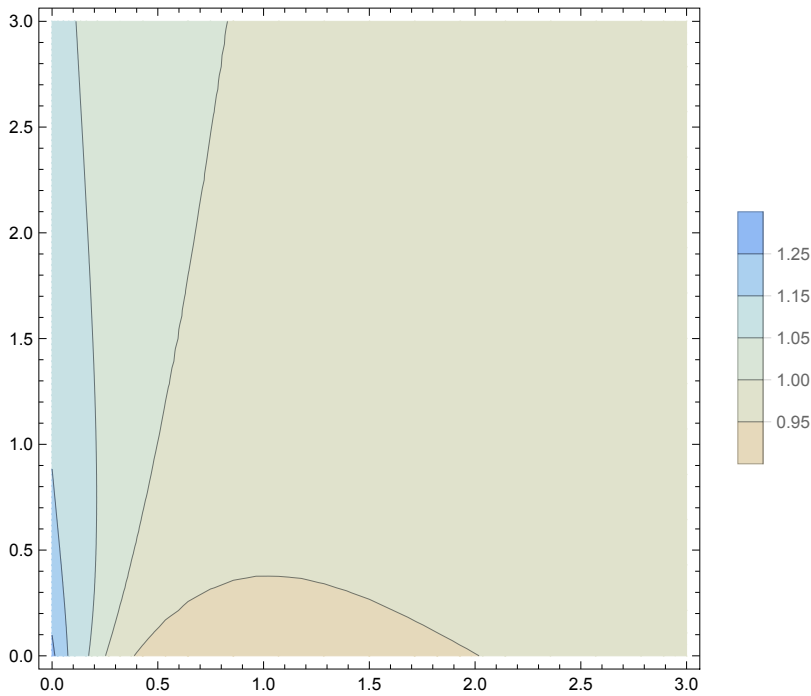

```
Limit[Limit[S1xS3$ConcordanceRatio /  $\left(1 - \frac{2 e^{-t_2}}{3}\right)$ , t1 -> 0], t2 -> 0]
```

```
- 252 + 89 Log[2]
```

```
- 192 + 62 Log[2]
```

```
S1xS3$S2xS3$MutationMatrix =
```

```
  Outer[GetBranchProducts[###, S1xS3$S2xS3] &, trees, trees] -
  Outer[CullDerivedAncestralProducts[###, S1xS3$S2xS3] &, trees, trees] +
  Outer[AddDerivedAncestralOrdering[###, S1xS3$S2xS3] &, trees, trees];
```

```
S1xS3$S2xS3$TreeMatrix = Outer[Times, tree$probabilities, tree$probabilities];
```

```
S1xS3$S2xS3$PMatrix = S1xS3$S2xS3$MutationMatrix * S1xS3$S2xS3$TreeMatrix;
```



$S1 \times S3 \times S2 \times S3$  MarginalConcordant =

```
Simplify[
  (1/2) (Total[S1xS3$S2xS3$PMatrix[[1]]] + Total[S1xS3$S2xS3$PMatrix[[2]]] +
    Total[S1xS3$S2xS3$PMatrix[[All, 1]]] +
    Total[S1xS3$S2xS3$PMatrix[[All, 2]]]);
```

$S1 \times S3 \times S2 \times S3$  MarginalDiscordant =

```
Simplify[
  (1/2) (Total[S1xS3$S2xS3$PMatrix[[3]]] + Total[S1xS3$S2xS3$PMatrix[[4]]] +
    Total[S1xS3$S2xS3$PMatrix[[All, 3]]] + Total[S1xS3$S2xS3$PMatrix[[All, 4]]]);
```

$S1 \times S3 \times S2 \times S3$  ConcordanceRatio = Simplify[ $S1 \times S3 \times S2 \times S3$  MarginalConcordant /  
( $S1 \times S3 \times S2 \times S3$  MarginalConcordant +  $S1 \times S3 \times S2 \times S3$  MarginalDiscordant)];

```
ContourPlot[S1xS3$S2xS3$ConcordanceRatio / (1 - (2 e^-t2) / 3),
  {t2, 0, 3}, {t1, 0, 3}, PlotLegends -> Automatic,
  PlotRange -> All,
  Contours -> {0.55, 0.65, 0.75, 0.85, 0.95, 1, 1.05, 1.15, 1.25, 1.35, 1.45, 1.55},
  ColorFunctionScaling -> False,
  ColorFunction -> ColorData[{"ThermometerColors", {1.6, 0.4}}]
```

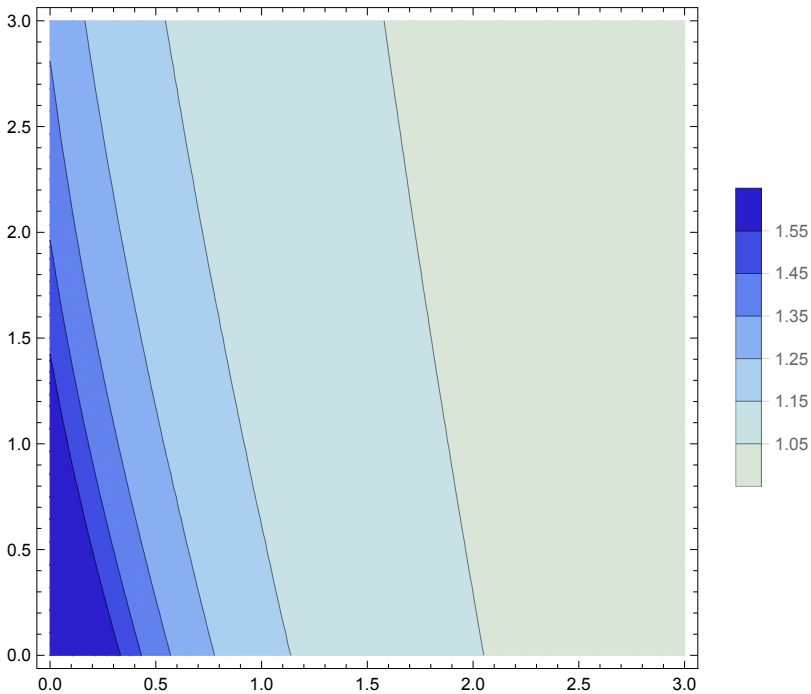

Limit[Limit[ $S1 \times S3 \times S2 \times S3$  ConcordanceRatio / (1 - (2 e^-t2) / 3), t1 -> 0], t2 -> 0]

$\frac{7}{3}$

$$N\left[\frac{7}{3}\right]$$

2.33333

```
ContourPlot[x + y, {x, 0.5, 0.55}, {y, 0, 1.05},
  PlotLegends -> Placed[Automatic, Right], ColorFunctionScaling -> False,
  Contours -> {0.55, 0.65, 0.75, 0.85, 0.95, 1.05, 1.15, 1.25, 1.35, 1.45, 1.55},
  ColorFunction -> ColorData[{"ThermometerColors", {1.6, 0.4}}]]
```

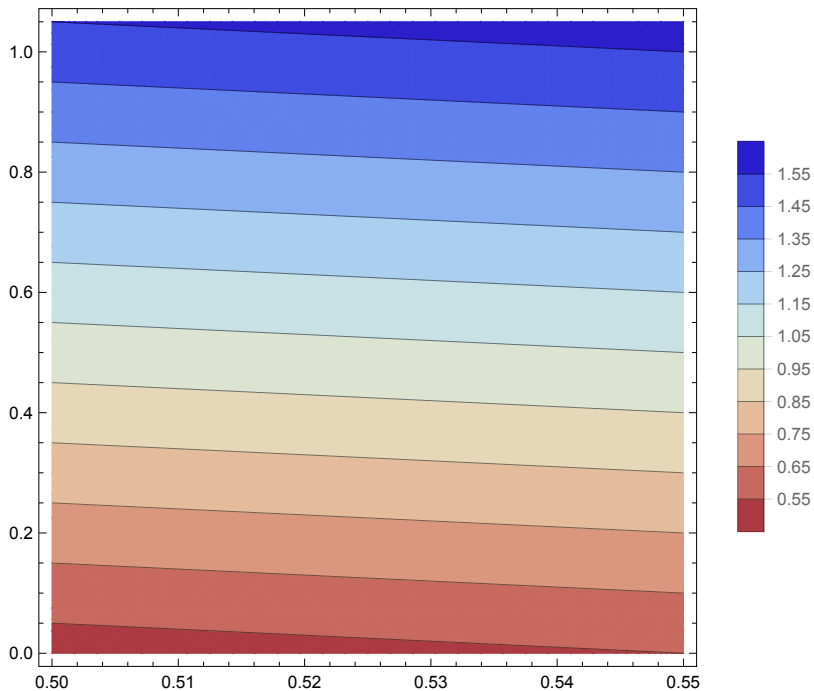

```
TotalP = Total[S1xS2$PMatrix, 2] + Total[S1xS3$PMatrix, 2] +
  Total[S2xS3$PMatrix, 2] + Total[S1xS3$S2xS3$PMatrix, 2] +
  Total[S1xS2$S1xS3$PMatrix, 2] + Total[S1xS2$S2xS3$PMatrix, 2];
```

```
P$concord = Simplify[(S1xS2$ConcordanceRatio * Total[S1xS2$PMatrix, 2] +
  S1xS3$ConcordanceRatio * Total[S1xS3$PMatrix, 2] +
  S2xS3$ConcordanceRatio * Total[S2xS3$PMatrix, 2] +
  S1xS3$S2xS3$ConcordanceRatio * Total[S1xS3$S2xS3$PMatrix, 2] +
  S1xS2$S1xS3$ConcordanceRatio * Total[S1xS2$S1xS3$PMatrix, 2] +
  S1xS2$S2xS3$ConcordanceRatio * Total[S1xS2$S2xS3$PMatrix, 2]) /
  TotalP];
```

```
ContourPlot[P$concord /  $\left(1 - \frac{2e^{-t_2}}{3}\right)$ , {t2, 0, 3}, {t1, 0, 3}, PlotLegends → Automatic,
  ColorFunction → ColorData[{"RedBlueTones", {1.05, 0.95}}],
  PlotRange → All, ColorFunctionScaling → False,
  Contours → {0.95, 0.96, 0.97, 0.98, 0.99, 1.00, 1.01, 1.02, 1.03, 1.04}]
```

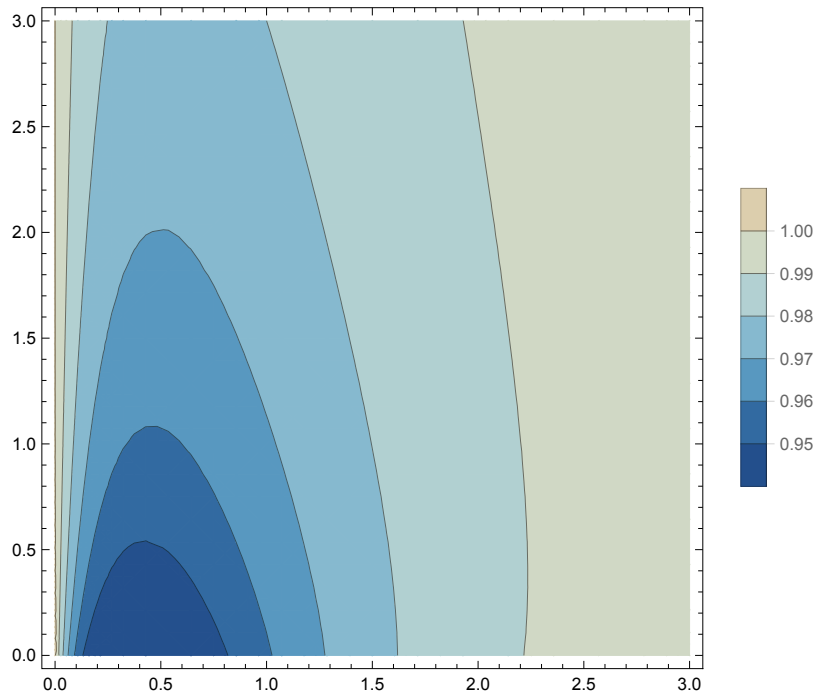

```
FindMinimum[{P$concord /  $\left(1 - \frac{2e^{-t_2}}{3}\right)$ , t1 >= 0 && t2 >= 0}, {{t1, 1}, {t2, 1}}]
{0.931998, {t1 → 1.86898 × 10-6, t2 → 0.359363}}
```

```
ContourPlot[x + y, {x, .945, 1}, {y, 0, .06},  
  PlotLegends → Placed[Automatic, Right], ColorFunctionScaling → False,  
  Contours → {0.95, 0.96, 0.97, 0.98, 0.99, 1.00, 1.01, 1.02, 1.03, 1.04, 1.05},  
  ColorFunction → ColorData[{"RedBlueTones", {1.05, 0.95}}]]
```

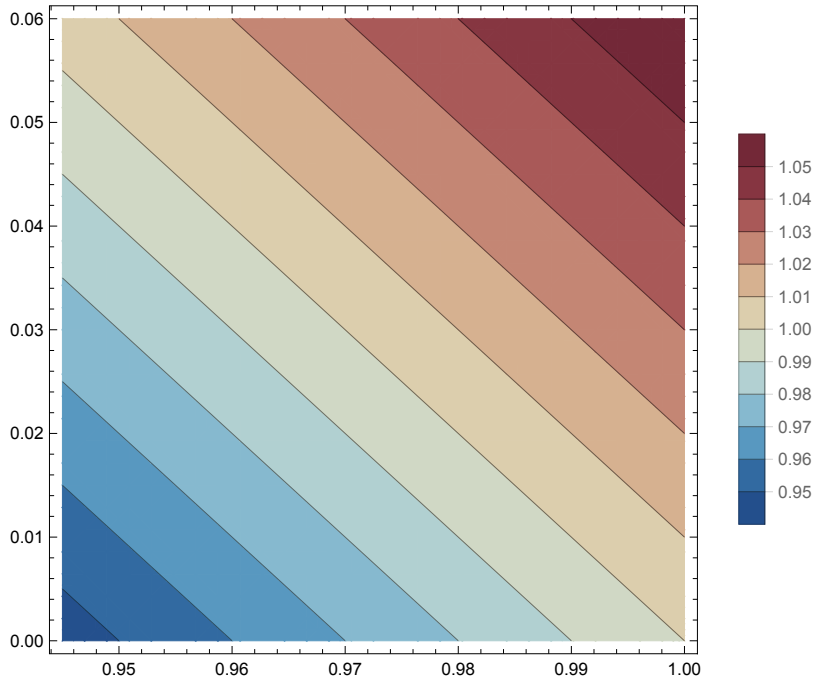

```
ContourPlot[(Total[S1xS2$S2xS3$PMatrix, 2] + Total[S1xS2$S1xS3$PMatrix, 2] +
  Total[S1xS3$S2xS3$PMatrix, 2]) / TotalP, {t2, 0, 3}, {t1, 0, 3},
  ColorFunctionScaling -> False, PlotRange -> All,
  Contours -> {0.05, 0.1, 0.15, 0.2, 0.25, 0.3, 1/3, 0.35, 0.4, 0.45, 0.5},
  ColorFunction -> ColorData[{"GrayTones", {0.5, 0}}],
  PlotLegends -> Automatic]
```

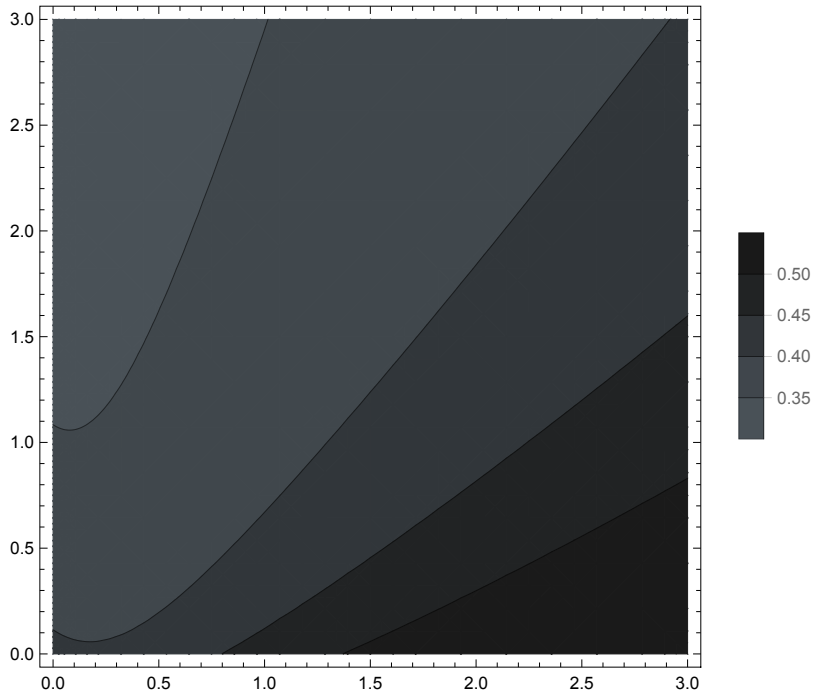

```
ContourPlot[(Total[S1xS2$PMatrix, 2] + Total[S1xS2$S1xS3$PMatrix, 2] +  
  Total[S1xS2$S2xS3$PMatrix, 2]) / TotalP, {t2, 0, 3}, {t1, 0, 3},  
  ColorFunctionScaling -> False,  
  Contours -> {0.05, 0.1, 0.15, 0.2, 0.25, 0.3, 0.35, 0.4, 0.45, 0.5},  
  ColorFunction -> ColorData[{"GrayTones", {0.5, 0}}]]
```

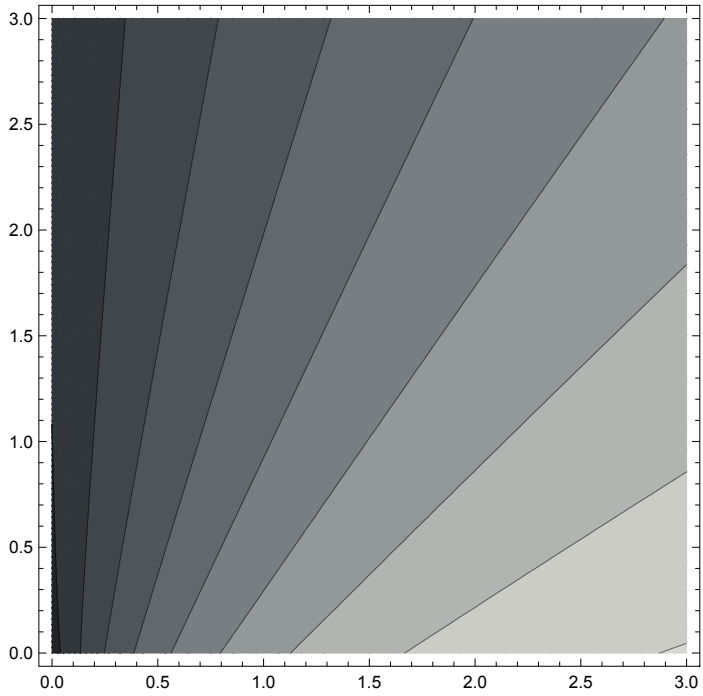

```
ContourPlot[Total[S1xS3$PMatrix, 2]/TotalP, {t2, 0, 3}, {t1, 0, 3},  
  ColorFunctionScaling -> False,  
  Contours -> {0.05, 0.1, 0.15, 0.2, 0.25, 0.3, 0.35, 0.4, 0.45, 0.5},  
  ColorFunction -> ColorData[{"GrayTones", {0.5, 0}}]]
```

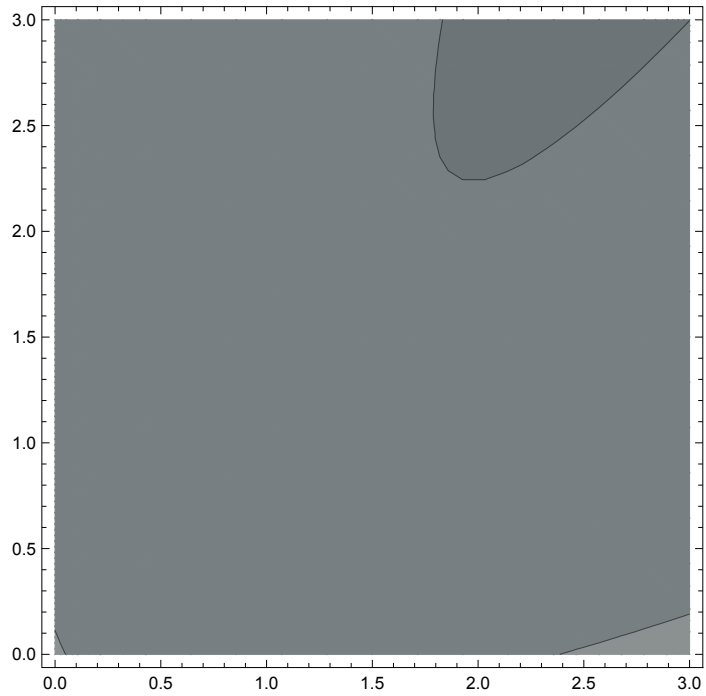

```
ContourPlot[(Total[S1xS3$S2xS3$PMatrix, 2]) / TotalP, {t2, 0, 3}, {t1, 0, 3},  
ColorFunctionScaling -> False,  
Contours -> {0.05, 0.1, 0.15, 0.2, 0.25, 0.3, 0.35, 0.4, 0.45, 0.5},  
ColorFunction -> ColorData[{"GrayTones", {0.5, 0}}]]
```

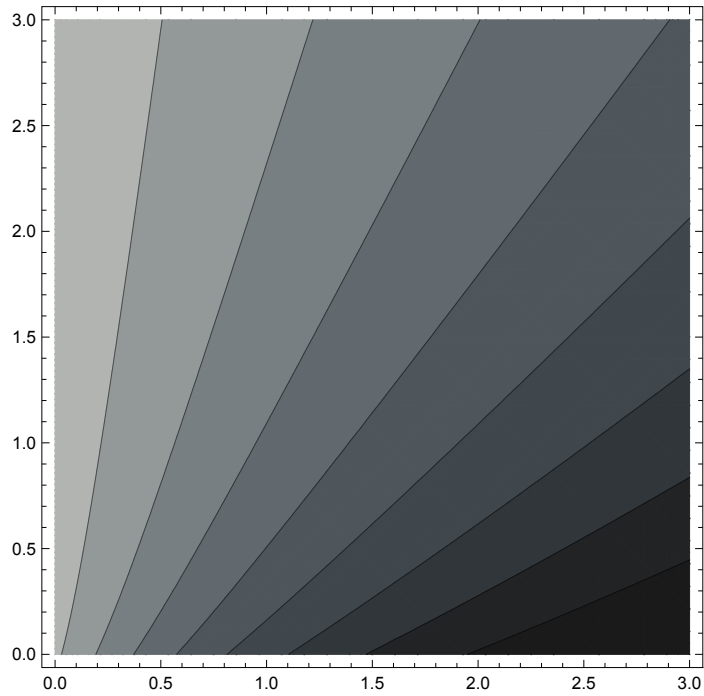



```
ContourPlot[Total[S1xS2$S2xS3$PMatrix, 2] / TotalP, {t2, 0, 3}, {t1, 0, 3},  
  ColorFunctionScaling -> False,  
  Contours -> {0.05, 0.1, 0.15, 0.2, 0.25, 0.3, 0.35, 0.4, 0.45, 0.5},  
  ColorFunction -> ColorData[{"GrayTones", {0.5, 0}}]]
```

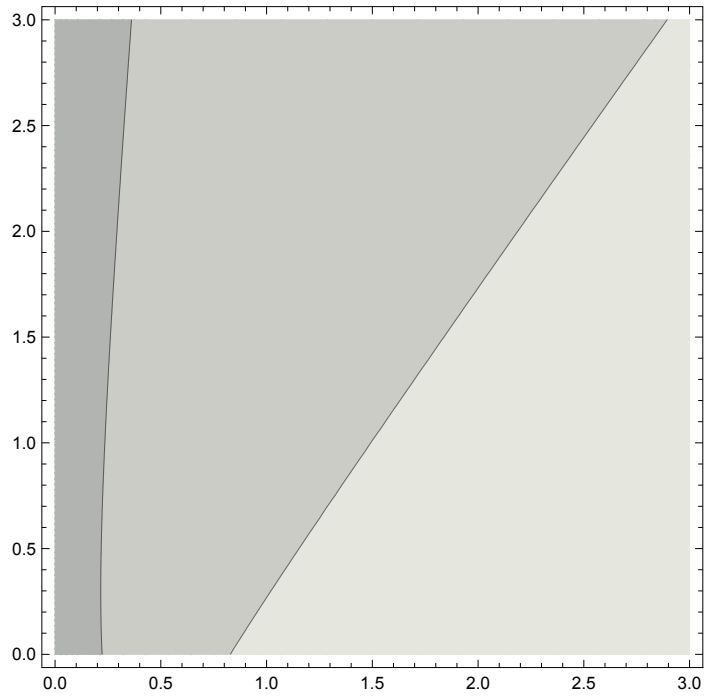

```
ContourPlot[Total[S1xS3$S2xS3$PMatrix, 2] / TotalP, {t2, 0, 3}, {t1, 0, 3},  
ColorFunctionScaling → False,  
Contours → {0.1, 0.15, 0.2, 0.25, 0.3, 1/3, 0.35, 0.4, 0.45, 0.5},  
ColorFunction → ColorData[{"GrayTones", {0.6, 0}}],  
PlotLegends → Automatic, FrameLabel → Automatic]
```

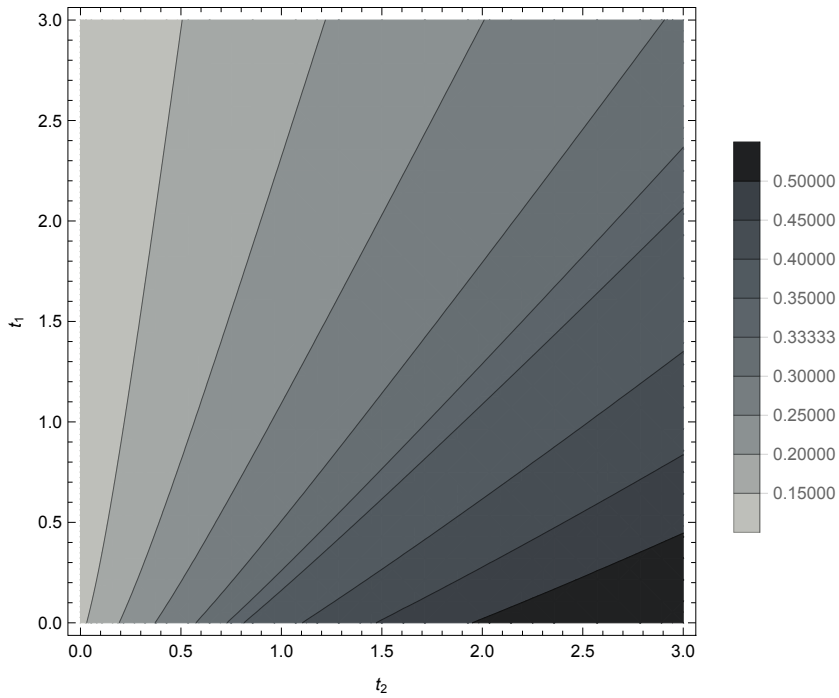

```
ContourPlot[Total[S1xS2$S1xS3$PMatrix, 2] / TotalP, {t2, 0, 3}, {t1, 0, 3},
  ColorFunctionScaling -> False,
  Contours -> 5,
  ColorFunction -> ColorData[{"GrayTones", {0.6, 0}}],
  PlotLegends -> Automatic, FrameLabel -> Automatic]
```

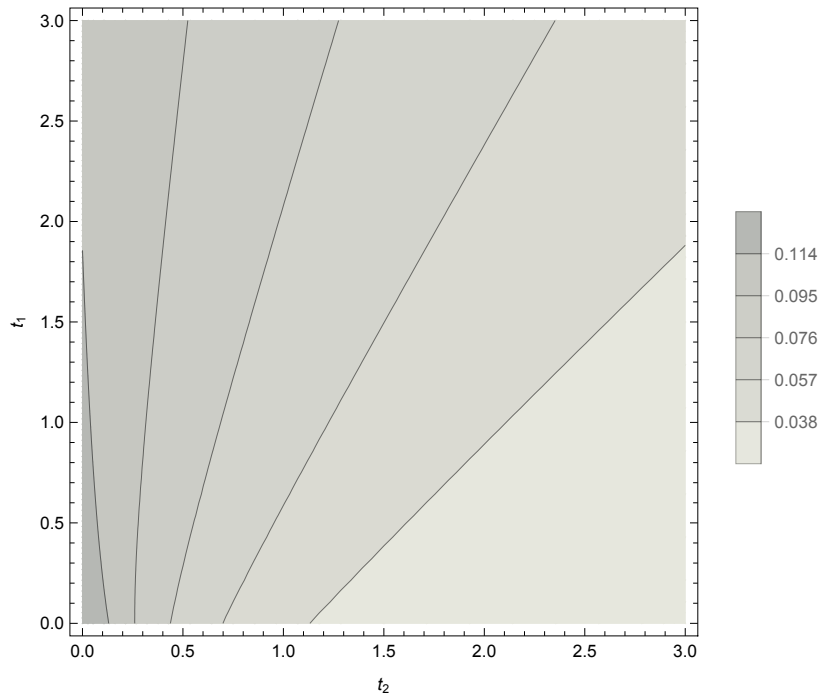

```
S1xS2$AncestralP =
  (Outer[GetBranchProducts$AncOnly[###, S1xS2] &, trees, trees] -
   Outer[CullDerivedAncestralProducts$AncOnly[###, S1xS2] &, trees, trees] +
   Outer[AddDerivedAncestralOrdering$AncOnly[###, S1xS2] &, trees, trees]) *
  S1xS2$TreeMatrix;
```

```
ContourPlot[Total[S1xS2$AncestralP, 2] / Total[S1xS2$PMatrix, 2],
  {t2, 0, 3}, {t1, 0, 3}, PlotLegends -> Automatic, FrameLabel -> Automatic]
```

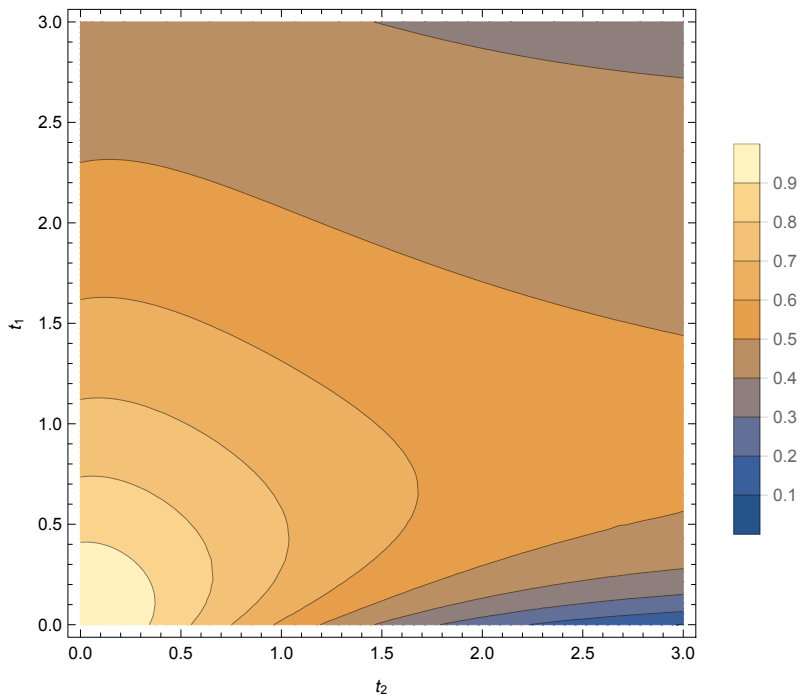

```
S1xS3$AncestralP =
```

```
(Outer[GetBranchProducts$AncOnly[###, S1xS3] &, trees, trees] -
  Outer[CullDerivedAncestralProducts$AncOnly[###, S1xS3] &, trees, trees] +
  Outer[AddDerivedAncestralOrdering$AncOnly[###, S1xS3] &, trees, trees]) *
  S1xS3$TreeMatrix;
```

```
S2xS3$AncestralP =
```

```
(Outer[GetBranchProducts$AncOnly[###, S2xS3] &, trees, trees] -
  Outer[CullDerivedAncestralProducts$AncOnly[###, S2xS3] &, trees, trees] +
  Outer[AddDerivedAncestralOrdering$AncOnly[###, S2xS3] &, trees, trees]) *
  S2xS3$TreeMatrix;
```

```
ContourPlot[Total[S1xS3$AncestralP, 2] / Total[S1xS3$PMatrix, 2],
  {t2, 0, 3}, {t1, 0, 3}, PlotLegends -> Automatic, FrameLabel -> Automatic]
```

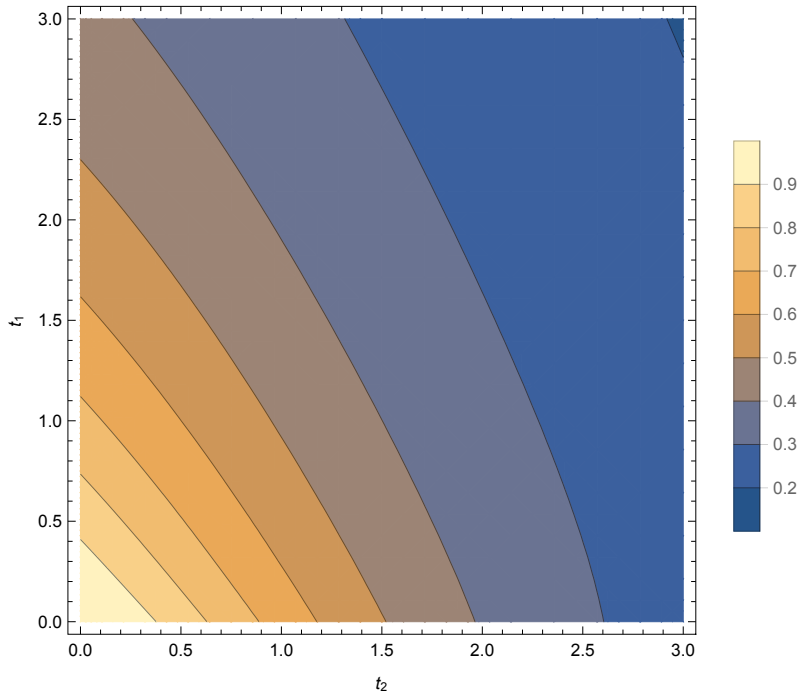

```
S1xS2$S1xS3$AncestralP =
```

```
(Outer[GetBranchProducts$AncOnly[###, S1xS2$S1xS3] &, trees, trees] -
  Outer[CullDerivedAncestralProducts$AncOnly[###, S1xS2$S1xS3] &, trees, trees] +
  Outer[AddDerivedAncestralOrdering$AncOnly[###, S1xS2$S1xS3] &, trees, trees]) *
  S1xS2$S1xS3$TreeMatrix;
```

```
S1xS2$S2xS3$AncestralP =
```

```
(Outer[GetBranchProducts$AncOnly[###, S1xS2$S2xS3] &, trees, trees] -
  Outer[CullDerivedAncestralProducts$AncOnly[###, S1xS2$S2xS3] &, trees, trees] +
  Outer[AddDerivedAncestralOrdering$AncOnly[###, S1xS2$S2xS3] &, trees, trees]) *
  S1xS2$S2xS3$TreeMatrix;
```

```
ContourPlot[Total[S1xS2$S1xS3$AncestralP, 2] / Total[S1xS2$S1xS3$PMatrix, 2],
  {t2, 0, 3}, {t1, 0, 3}, PlotLegends -> Automatic, FrameLabel -> Automatic]
```

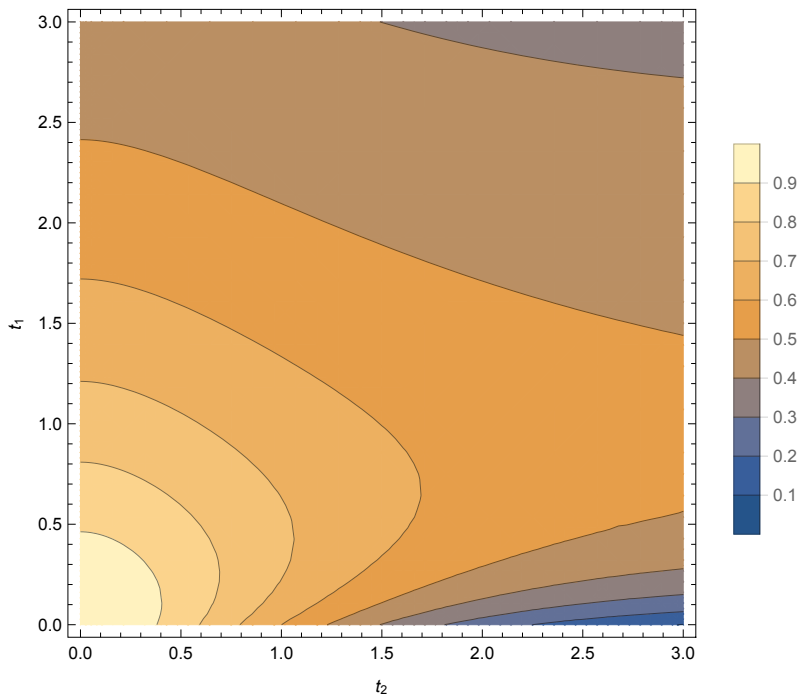

```
S1xS3$S2xS3$AncestralP =
```

```
(Outer[GetBranchProducts$AncOnly[###, S1xS3$S2xS3] &, trees, trees] -
  Outer[CullDerivedAncestralProducts$AncOnly[###, S1xS3$S2xS3] &, trees, trees] +
  Outer[AddDerivedAncestralOrdering$AncOnly[###, S1xS3$S2xS3] &, trees, trees]) *
  S1xS3$S2xS3$TreeMatrix;
```

```
ContourPlot[Total[S1xS3$S2xS3$AncestralP, 2] / Total[S1xS3$S2xS3$PMatrix, 2],
  {t2, 0, 3}, {t1, 0, 3}, PlotLegends -> Automatic, FrameLabel -> Automatic]
```

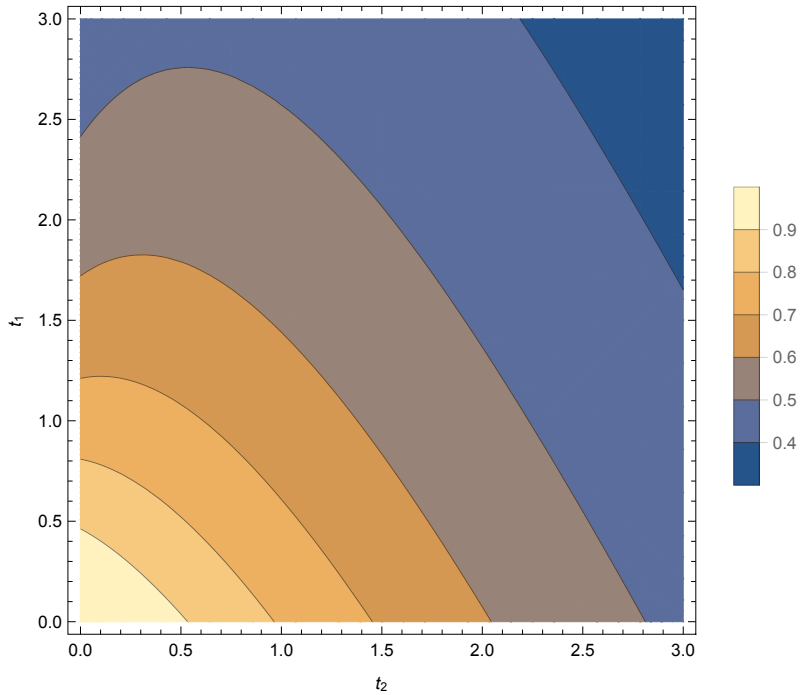

```
P$ancestral = Simplify[(Total[S1xS2$AncestralP, 2] +
  Total[S1xS3$AncestralP, 2] +
  Total[S2xS3$AncestralP, 2] +
  Total[S1xS3$S2xS3$AncestralP, 2] +
  Total[S1xS2$S1xS3$AncestralP, 2] +
  Total[S1xS2$S2xS3$AncestralP, 2]) /
  (Total[S1xS2$PMatrix, 2] + Total[S1xS3$PMatrix, 2] +
  Total[S2xS3$PMatrix, 2] + Total[S1xS3$S2xS3$PMatrix, 2] +
  Total[S1xS2$S1xS3$PMatrix, 2] + Total[S1xS2$S2xS3$PMatrix, 2])];
```

```
ContourPlot[P$ancestral, {t2, 0, 3}, {t1, 0, 3},  
ColorFunctionScaling → False, PlotRange → All,  
Contours → {0.3, 0.4, 0.5, 0.6, 0.7, 0.8, 0.9},  
ColorFunction → ColorData[{"GrayTones", {1, 0.3}}],  
PlotLegends → Automatic]
```

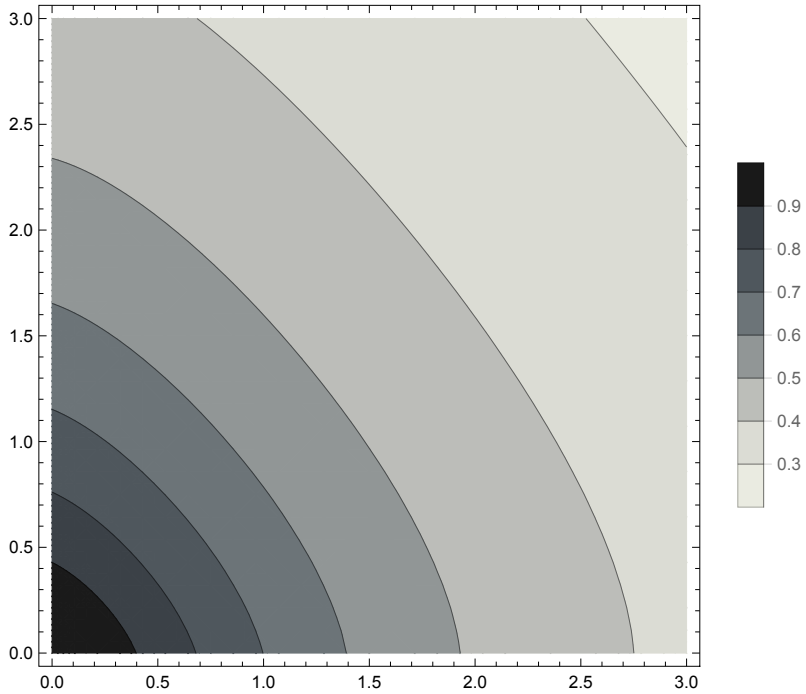

Supplement: EVL3-2-281-s014.pdf [file EVL3-2-281-s014.pdf]
