# Supplementary material for: Speciation genes are more likely to have discordant gene trees
Source: PubMed Central journal article supplement (PMC6121824; doi:10.1002/evl3.77), 2018-08-08
Supplement: EVL3-2-281-s012.pdf [file EVL3-2-281-s012.pdf]

## Appendix 1. Incompatibility Matrices

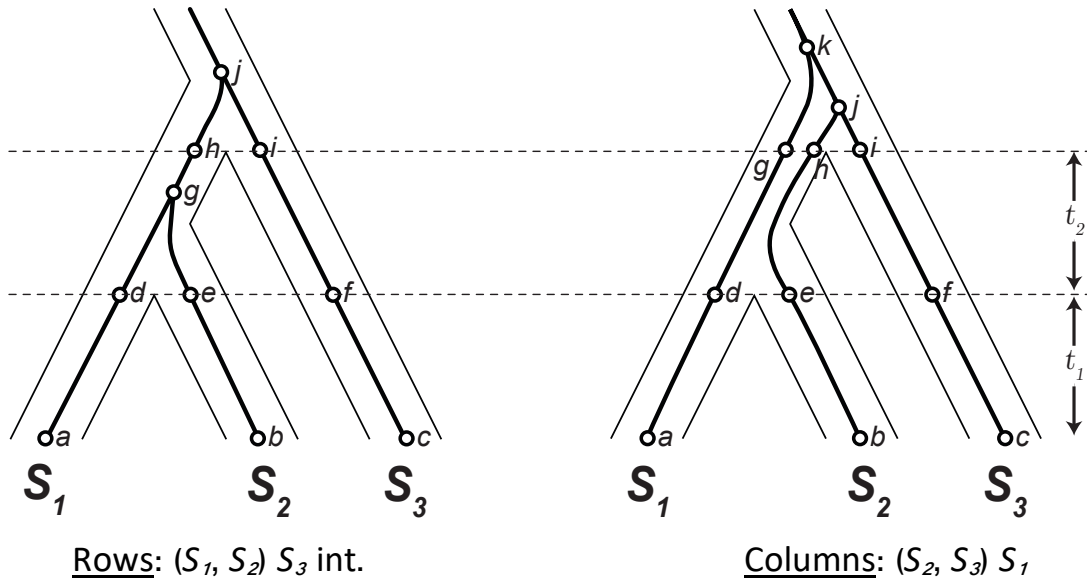

|                                       |    | S <sub>1</sub> derived                                             |                                                                    |                                                                    | S <sub>2</sub> derived                                             |                                                                    |                                                                    | S <sub>3</sub> derived                                             |                                                                    |                                                                    | S <sub>2, S<sub>3</sub></sub> derived                              |
|---------------------------------------|----|--------------------------------------------------------------------|--------------------------------------------------------------------|--------------------------------------------------------------------|--------------------------------------------------------------------|--------------------------------------------------------------------|--------------------------------------------------------------------|--------------------------------------------------------------------|--------------------------------------------------------------------|--------------------------------------------------------------------|--------------------------------------------------------------------|
|                                       |    | ad                                                                 | dg                                                                 | gk                                                                 | be                                                                 | eh                                                                 | hj                                                                 | cf                                                                 | fi                                                                 | ij                                                                 | jk                                                                 |
| S <sub>1</sub> derived                | ad | S <sub>1</sub> x S <sub>2</sub><br>S <sub>1</sub> x S <sub>3</sub> | S <sub>1</sub> x S <sub>2</sub><br>S <sub>1</sub> x S <sub>3</sub> | S <sub>1</sub> x S <sub>2</sub><br>S <sub>1</sub> x S <sub>3</sub> | S <sub>1</sub> x S <sub>2</sub>                                    | S <sub>1</sub> x S <sub>2</sub>                                    | S <sub>1</sub> x S <sub>2</sub>                                    | S <sub>1</sub> x S <sub>3</sub>                                    | S <sub>1</sub> x S <sub>3</sub>                                    | S <sub>1</sub> x S <sub>3</sub>                                    | S <sub>1</sub> x S <sub>2</sub><br>S <sub>1</sub> x S <sub>3</sub> |
|                                       | dg | S <sub>1</sub> x S <sub>2</sub><br>S <sub>1</sub> x S <sub>3</sub> | -                                                                  | -                                                                  | S <sub>1</sub> x S <sub>2</sub>                                    | -                                                                  | -                                                                  | S <sub>1</sub> x S <sub>3</sub>                                    | S <sub>1</sub> x S <sub>3</sub>                                    | S <sub>1</sub> x S <sub>3</sub>                                    | -                                                                  |
| S <sub>2</sub> derived                | be | S <sub>1</sub> x S <sub>2</sub>                                    | S <sub>1</sub> x S <sub>2</sub>                                    | S <sub>1</sub> x S <sub>2</sub>                                    | S <sub>1</sub> x S <sub>2</sub><br>S <sub>2</sub> x S <sub>3</sub> | S <sub>1</sub> x S <sub>2</sub><br>S <sub>2</sub> x S <sub>3</sub> | S <sub>1</sub> x S <sub>2</sub><br>S <sub>2</sub> x S <sub>3</sub> | S <sub>2</sub> x S <sub>3</sub>                                    | S <sub>2</sub> x S <sub>3</sub>                                    | S <sub>2</sub> x S <sub>3</sub>                                    | S <sub>1</sub> x S <sub>2</sub>                                    |
|                                       | eg | S <sub>1</sub> x S <sub>2</sub>                                    | -                                                                  | -                                                                  | S <sub>1</sub> x S <sub>2</sub><br>S <sub>2</sub> x S <sub>3</sub> | -                                                                  | -                                                                  | S <sub>2</sub> x S <sub>3</sub>                                    | S <sub>2</sub> x S <sub>3</sub>                                    | S <sub>2</sub> x S <sub>3</sub>                                    | -                                                                  |
| S <sub>3</sub> derived                | cf | S <sub>1</sub> x S <sub>3</sub>                                    | S <sub>1</sub> x S <sub>3</sub>                                    | S <sub>1</sub> x S <sub>3</sub>                                    | S <sub>2</sub> x S <sub>3</sub>                                    | S <sub>2</sub> x S <sub>3</sub>                                    | S <sub>2</sub> x S <sub>3</sub>                                    | S <sub>1</sub> x S <sub>3</sub><br>S <sub>2</sub> x S <sub>3</sub> | S <sub>1</sub> x S <sub>3</sub><br>S <sub>2</sub> x S <sub>3</sub> | S <sub>1</sub> x S <sub>3</sub><br>S <sub>2</sub> x S <sub>3</sub> | S <sub>1</sub> x S <sub>3</sub>                                    |
|                                       | fi | S <sub>1</sub> x S <sub>3</sub>                                    | S <sub>1</sub> x S <sub>3</sub>                                    | S <sub>1</sub> x S <sub>3</sub>                                    | S <sub>2</sub> x S <sub>3</sub>                                    | S <sub>2</sub> x S <sub>3</sub>                                    | S <sub>2</sub> x S <sub>3</sub>                                    | S <sub>1</sub> x S <sub>3</sub><br>S <sub>2</sub> x S <sub>3</sub> | S <sub>1</sub> x S <sub>3</sub><br>S <sub>2</sub> x S <sub>3</sub> | S <sub>1</sub> x S <sub>3</sub><br>S <sub>2</sub> x S <sub>3</sub> | S <sub>1</sub> x S <sub>3</sub>                                    |
|                                       | ij | S <sub>1</sub> x S <sub>3</sub>                                    | S <sub>1</sub> x S <sub>3</sub>                                    | -                                                                  | S <sub>2</sub> x S <sub>3</sub>                                    | S <sub>2</sub> x S <sub>3</sub>                                    | -                                                                  | S <sub>1</sub> x S <sub>3</sub><br>S <sub>2</sub> x S <sub>3</sub> | S <sub>1</sub> x S <sub>3</sub><br>S <sub>2</sub> x S <sub>3</sub> | -                                                                  | -                                                                  |
| S <sub>1, S<sub>2</sub></sub> derived | gh | S <sub>1</sub> x S <sub>3</sub>                                    | S <sub>1</sub> x S <sub>3</sub>                                    | -                                                                  | S <sub>2</sub> x S <sub>3</sub>                                    | S <sub>2</sub> x S <sub>3</sub>                                    | -                                                                  | S <sub>1</sub> x S <sub>3</sub><br>S <sub>2</sub> x S <sub>3</sub> | S <sub>1</sub> x S <sub>3</sub><br>S <sub>2</sub> x S <sub>3</sub> | S <sub>1</sub> x S <sub>3</sub><br>S <sub>2</sub> x S <sub>3</sub> | -                                                                  |
|                                       | hj | S <sub>1</sub> x S <sub>3</sub>                                    | S <sub>1</sub> x S <sub>3</sub>                                    | -                                                                  | S <sub>2</sub> x S <sub>3</sub>                                    | S <sub>2</sub> x S <sub>3</sub>                                    | -                                                                  | S <sub>1</sub> x S <sub>3</sub><br>S <sub>2</sub> x S <sub>3</sub> | S <sub>1</sub> x S <sub>3</sub><br>S <sub>2</sub> x S <sub>3</sub> | -                                                                  | -                                                                  |

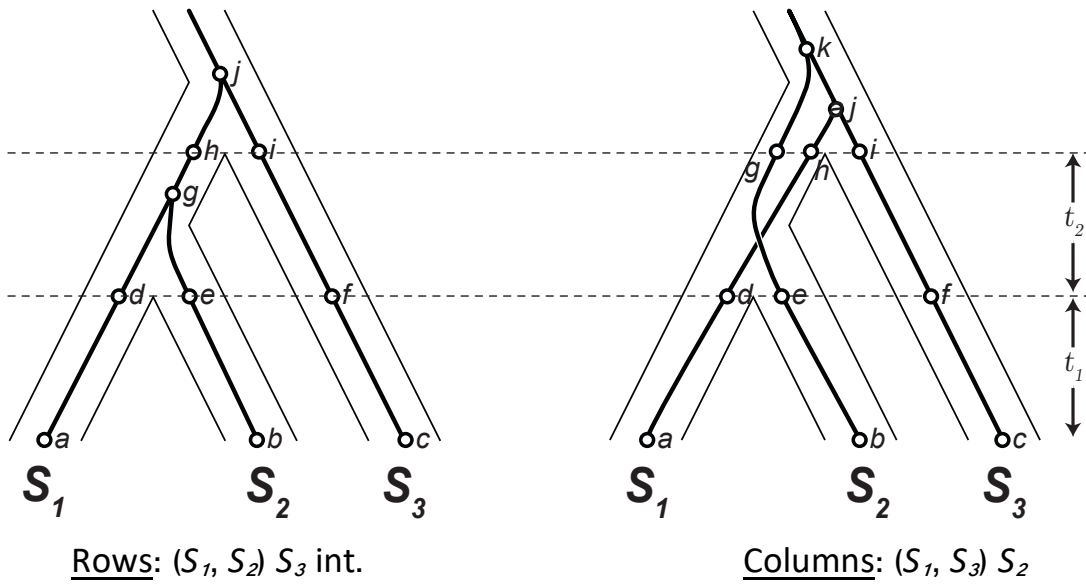

|                                       |    | S <sub>1</sub> derived                                             |                                                                    |                                                                    | S <sub>2</sub> derived                                             |                                                                    |                                                                    | S <sub>3</sub> derived                                             |                                                                    |                                                                    | S <sub>1, S<sub>3</sub></sub> derived                              |
|---------------------------------------|----|--------------------------------------------------------------------|--------------------------------------------------------------------|--------------------------------------------------------------------|--------------------------------------------------------------------|--------------------------------------------------------------------|--------------------------------------------------------------------|--------------------------------------------------------------------|--------------------------------------------------------------------|--------------------------------------------------------------------|--------------------------------------------------------------------|
|                                       |    | ad                                                                 | dh                                                                 | hj                                                                 | be                                                                 | eg                                                                 | gk                                                                 | cf                                                                 | fi                                                                 | ij                                                                 | jk                                                                 |
| S <sub>1</sub> derived                | ad | S <sub>1</sub> x S <sub>2</sub><br>S <sub>1</sub> x S <sub>3</sub> | S <sub>1</sub> x S <sub>2</sub><br>S <sub>1</sub> x S <sub>3</sub> | S <sub>1</sub> x S <sub>2</sub><br>S <sub>1</sub> x S <sub>3</sub> | S <sub>1</sub> x S <sub>2</sub>                                    | S <sub>1</sub> x S <sub>2</sub>                                    | S <sub>1</sub> x S <sub>2</sub>                                    | S <sub>1</sub> x S <sub>3</sub>                                    | S <sub>1</sub> x S <sub>3</sub>                                    | S <sub>1</sub> x S <sub>3</sub>                                    | S <sub>1</sub> x S <sub>2</sub>                                    |
|                                       | dg | S <sub>1</sub> x S <sub>2</sub><br>S <sub>1</sub> x S <sub>3</sub> | -                                                                  | -                                                                  | S <sub>1</sub> x S <sub>2</sub>                                    | -                                                                  | -                                                                  | S <sub>1</sub> x S <sub>3</sub>                                    | S <sub>1</sub> x S <sub>3</sub>                                    | S <sub>1</sub> x S <sub>3</sub>                                    | -                                                                  |
| S <sub>2</sub> derived                | be | S <sub>1</sub> x S <sub>2</sub>                                    | S <sub>1</sub> x S <sub>2</sub>                                    | S <sub>1</sub> x S <sub>2</sub>                                    | S <sub>1</sub> x S <sub>2</sub><br>S <sub>2</sub> x S <sub>3</sub> | S <sub>1</sub> x S <sub>2</sub><br>S <sub>2</sub> x S <sub>3</sub> | S <sub>1</sub> x S <sub>2</sub><br>S <sub>2</sub> x S <sub>3</sub> | S <sub>2</sub> x S <sub>3</sub>                                    | S <sub>2</sub> x S <sub>3</sub>                                    | S <sub>2</sub> x S <sub>3</sub>                                    | S <sub>1</sub> x S <sub>2</sub><br>S <sub>2</sub> x S <sub>3</sub> |
|                                       | eg | S <sub>1</sub> x S <sub>2</sub>                                    | -                                                                  | -                                                                  | S <sub>1</sub> x S <sub>2</sub><br>S <sub>2</sub> x S <sub>3</sub> | -                                                                  | -                                                                  | S <sub>2</sub> x S <sub>3</sub>                                    | S <sub>2</sub> x S <sub>3</sub>                                    | S <sub>2</sub> x S <sub>3</sub>                                    | -                                                                  |
| S <sub>3</sub> derived                | cf | S <sub>1</sub> x S <sub>3</sub>                                    | S <sub>1</sub> x S <sub>3</sub>                                    | S <sub>1</sub> x S <sub>3</sub>                                    | S <sub>2</sub> x S <sub>3</sub>                                    | S <sub>2</sub> x S <sub>3</sub>                                    | S <sub>2</sub> x S <sub>3</sub>                                    | S <sub>1</sub> x S <sub>3</sub><br>S <sub>2</sub> x S <sub>3</sub> | S <sub>1</sub> x S <sub>3</sub><br>S <sub>2</sub> x S <sub>3</sub> | S <sub>1</sub> x S <sub>3</sub><br>S <sub>2</sub> x S <sub>3</sub> | S <sub>2</sub> x S <sub>3</sub>                                    |
|                                       | fi | S <sub>1</sub> x S <sub>3</sub>                                    | S <sub>1</sub> x S <sub>3</sub>                                    | S <sub>1</sub> x S <sub>3</sub>                                    | S <sub>2</sub> x S <sub>3</sub>                                    | S <sub>2</sub> x S <sub>3</sub>                                    | S <sub>2</sub> x S <sub>3</sub>                                    | S <sub>1</sub> x S <sub>3</sub><br>S <sub>2</sub> x S <sub>3</sub> | S <sub>1</sub> x S <sub>3</sub><br>S <sub>2</sub> x S <sub>3</sub> | S <sub>1</sub> x S <sub>3</sub><br>S <sub>2</sub> x S <sub>3</sub> | S <sub>2</sub> x S <sub>3</sub>                                    |
|                                       | ij | S <sub>1</sub> x S <sub>3</sub>                                    | S <sub>1</sub> x S <sub>3</sub>                                    | -                                                                  | S <sub>2</sub> x S <sub>3</sub>                                    | S <sub>2</sub> x S <sub>3</sub>                                    | -                                                                  | S <sub>1</sub> x S <sub>3</sub><br>S <sub>2</sub> x S <sub>3</sub> | S <sub>1</sub> x S <sub>3</sub><br>S <sub>2</sub> x S <sub>3</sub> | -                                                                  | -                                                                  |
| S <sub>1, S<sub>2</sub></sub> derived | gh | S <sub>1</sub> x S <sub>3</sub>                                    | S <sub>1</sub> x S <sub>3</sub>                                    | -                                                                  | S <sub>2</sub> x S <sub>3</sub>                                    | S <sub>2</sub> x S <sub>3</sub>                                    | -                                                                  | S <sub>1</sub> x S <sub>3</sub><br>S <sub>2</sub> x S <sub>3</sub> | S <sub>1</sub> x S <sub>3</sub><br>S <sub>2</sub> x S <sub>3</sub> | S <sub>1</sub> x S <sub>3</sub><br>S <sub>2</sub> x S <sub>3</sub> | -                                                                  |
|                                       | hj | S <sub>1</sub> x S <sub>3</sub>                                    | S <sub>1</sub> x S <sub>3</sub>                                    | -                                                                  | S <sub>2</sub> x S <sub>3</sub>                                    | S <sub>2</sub> x S <sub>3</sub>                                    | -                                                                  | S <sub>1</sub> x S <sub>3</sub><br>S <sub>2</sub> x S <sub>3</sub> | S <sub>1</sub> x S <sub>3</sub><br>S <sub>2</sub> x S <sub>3</sub> | -                                                                  | -                                                                  |

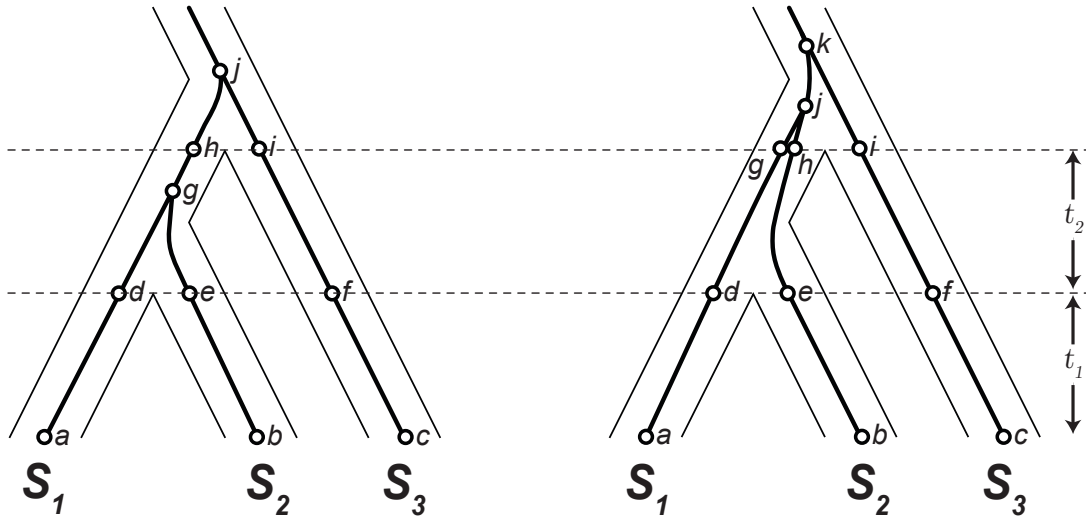

Rows: ( $S_1, S_2$ )  $S_3$  int.

Columns: ( $S_1, S_2$ )  $S_3$  anc.

|                                       |    | S <sub>1</sub> derived                                             |                                                                    |                                                                    | S <sub>2</sub> derived                                             |                                                                    |                                                                    | S <sub>3</sub> derived                                             |                                                                    |                                                                    | S <sub>1, S<sub>2</sub></sub> derived                              |
|---------------------------------------|----|--------------------------------------------------------------------|--------------------------------------------------------------------|--------------------------------------------------------------------|--------------------------------------------------------------------|--------------------------------------------------------------------|--------------------------------------------------------------------|--------------------------------------------------------------------|--------------------------------------------------------------------|--------------------------------------------------------------------|--------------------------------------------------------------------|
|                                       |    | ad                                                                 | dg                                                                 | gj                                                                 | be                                                                 | eh                                                                 | hj                                                                 | cf                                                                 | fi                                                                 | ik                                                                 | jk                                                                 |
| S <sub>1</sub> derived                | ad | S <sub>1</sub> x S <sub>2</sub><br>S <sub>1</sub> x S <sub>3</sub> | S <sub>1</sub> x S <sub>2</sub><br>S <sub>1</sub> x S <sub>3</sub> | S <sub>1</sub> x S <sub>2</sub><br>S <sub>1</sub> x S <sub>3</sub> | S <sub>1</sub> x S <sub>2</sub>                                    | S <sub>1</sub> x S <sub>2</sub>                                    | S <sub>1</sub> x S <sub>2</sub>                                    | S <sub>1</sub> x S <sub>3</sub>                                    | S <sub>1</sub> x S <sub>3</sub>                                    | S <sub>1</sub> x S <sub>3</sub>                                    | S <sub>1</sub> x S <sub>3</sub>                                    |
|                                       | dg | S <sub>1</sub> x S <sub>2</sub><br>S <sub>1</sub> x S <sub>3</sub> | -                                                                  | -                                                                  | S <sub>1</sub> x S <sub>2</sub>                                    | -                                                                  | -                                                                  | S <sub>1</sub> x S <sub>3</sub>                                    | S <sub>1</sub> x S <sub>3</sub>                                    | S <sub>1</sub> x S <sub>3</sub>                                    | S <sub>1</sub> x S <sub>3</sub>                                    |
| S <sub>2</sub> derived                | be | S <sub>1</sub> x S <sub>2</sub>                                    | S <sub>1</sub> x S <sub>2</sub>                                    | S <sub>1</sub> x S <sub>2</sub>                                    | S <sub>1</sub> x S <sub>2</sub><br>S <sub>2</sub> x S <sub>3</sub> | S <sub>1</sub> x S <sub>2</sub><br>S <sub>2</sub> x S <sub>3</sub> | S <sub>1</sub> x S <sub>2</sub><br>S <sub>2</sub> x S <sub>3</sub> | S <sub>2</sub> x S <sub>3</sub>                                    | S <sub>2</sub> x S <sub>3</sub>                                    | S <sub>2</sub> x S <sub>3</sub>                                    | S <sub>2</sub> x S <sub>3</sub>                                    |
|                                       | eg | S <sub>1</sub> x S <sub>2</sub>                                    | -                                                                  | -                                                                  | S <sub>1</sub> x S <sub>2</sub><br>S <sub>2</sub> x S <sub>3</sub> | -                                                                  | -                                                                  | S <sub>2</sub> x S <sub>3</sub>                                    | S <sub>2</sub> x S <sub>3</sub>                                    | S <sub>2</sub> x S <sub>3</sub>                                    | S <sub>2</sub> x S <sub>3</sub>                                    |
| S <sub>3</sub> derived                | cf | S <sub>1</sub> x S <sub>3</sub>                                    | S <sub>1</sub> x S <sub>3</sub>                                    | S <sub>1</sub> x S <sub>3</sub>                                    | S <sub>2</sub> x S <sub>3</sub>                                    | S <sub>2</sub> x S <sub>3</sub>                                    | S <sub>2</sub> x S <sub>3</sub>                                    | S <sub>1</sub> x S <sub>3</sub><br>S <sub>2</sub> x S <sub>3</sub> | S <sub>1</sub> x S <sub>3</sub><br>S <sub>2</sub> x S <sub>3</sub> | S <sub>1</sub> x S <sub>3</sub><br>S <sub>2</sub> x S <sub>3</sub> | S <sub>1</sub> x S <sub>3</sub><br>S <sub>2</sub> x S <sub>3</sub> |
|                                       | fi | S <sub>1</sub> x S <sub>3</sub>                                    | S <sub>1</sub> x S <sub>3</sub>                                    | S <sub>1</sub> x S <sub>3</sub>                                    | S <sub>2</sub> x S <sub>3</sub>                                    | S <sub>2</sub> x S <sub>3</sub>                                    | S <sub>2</sub> x S <sub>3</sub>                                    | S <sub>1</sub> x S <sub>3</sub><br>S <sub>2</sub> x S <sub>3</sub> | S <sub>1</sub> x S <sub>3</sub><br>S <sub>2</sub> x S <sub>3</sub> | S <sub>1</sub> x S <sub>3</sub><br>S <sub>2</sub> x S <sub>3</sub> | S <sub>1</sub> x S <sub>3</sub><br>S <sub>2</sub> x S <sub>3</sub> |
|                                       | ij | S <sub>1</sub> x S <sub>3</sub>                                    | S <sub>1</sub> x S <sub>3</sub>                                    | -                                                                  | S <sub>2</sub> x S <sub>3</sub>                                    | S <sub>2</sub> x S <sub>3</sub>                                    | -                                                                  | S <sub>1</sub> x S <sub>3</sub><br>S <sub>2</sub> x S <sub>3</sub> | S <sub>1</sub> x S <sub>3</sub><br>S <sub>2</sub> x S <sub>3</sub> | -                                                                  | -                                                                  |
| S <sub>1, S<sub>2</sub></sub> derived | gh | S <sub>1</sub> x S <sub>3</sub>                                    | S <sub>1</sub> x S <sub>3</sub>                                    | -                                                                  | S <sub>2</sub> x S <sub>3</sub>                                    | S <sub>2</sub> x S <sub>3</sub>                                    | -                                                                  | S <sub>1</sub> x S <sub>3</sub><br>S <sub>2</sub> x S <sub>3</sub> | S <sub>1</sub> x S <sub>3</sub><br>S <sub>2</sub> x S <sub>3</sub> | S <sub>1</sub> x S <sub>3</sub><br>S <sub>2</sub> x S <sub>3</sub> | S <sub>1</sub> x S <sub>3</sub><br>S <sub>2</sub> x S <sub>3</sub> |
|                                       | hj | S <sub>1</sub> x S <sub>3</sub>                                    | S <sub>1</sub> x S <sub>3</sub>                                    | -                                                                  | S <sub>2</sub> x S <sub>3</sub>                                    | S <sub>2</sub> x S <sub>3</sub>                                    | -                                                                  | S <sub>1</sub> x S <sub>3</sub><br>S <sub>2</sub> x S <sub>3</sub> | S <sub>1</sub> x S <sub>3</sub><br>S <sub>2</sub> x S <sub>3</sub> | -                                                                  | -                                                                  |

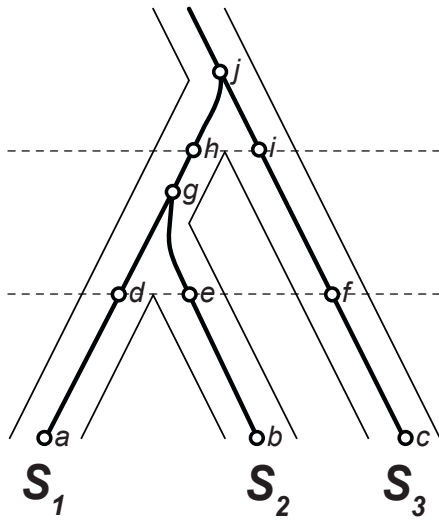

Rows: ( $S_1, S_2$ )  $S_3$  int.

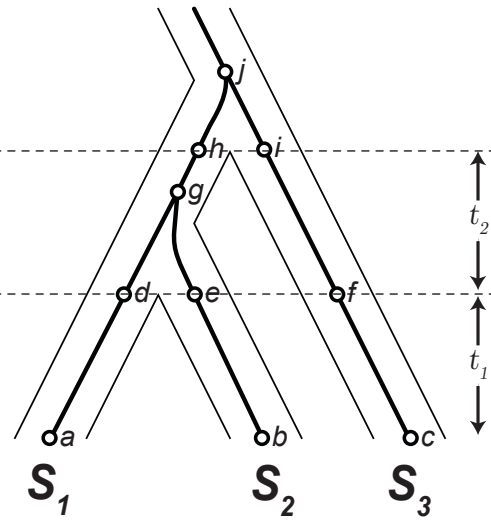

Columns: ( $S_1, S_2$ )  $S_3$  int.

|                                       |    | S <sub>1</sub> derived                                             |                                                                    | S <sub>2</sub> derived                                             |                                                                    | S <sub>3</sub> derived                                             |                                                                    |                                                                    | S <sub>1, S<sub>2</sub></sub> derived                              |                                                                    |
|---------------------------------------|----|--------------------------------------------------------------------|--------------------------------------------------------------------|--------------------------------------------------------------------|--------------------------------------------------------------------|--------------------------------------------------------------------|--------------------------------------------------------------------|--------------------------------------------------------------------|--------------------------------------------------------------------|--------------------------------------------------------------------|
|                                       |    | ad                                                                 | dg                                                                 | be                                                                 | eg                                                                 | cf                                                                 | fi                                                                 | ij                                                                 | gh                                                                 | hj                                                                 |
| S <sub>1</sub> derived                | ad | S <sub>1</sub> x S <sub>2</sub><br>S <sub>1</sub> x S <sub>3</sub> | S <sub>1</sub> x S <sub>2</sub><br>S <sub>1</sub> x S <sub>3</sub> | S <sub>1</sub> x S <sub>2</sub>                                    | S <sub>1</sub> x S <sub>2</sub>                                    | S <sub>1</sub> x S <sub>3</sub>                                    | S <sub>1</sub> x S <sub>3</sub>                                    | S <sub>1</sub> x S <sub>3</sub>                                    | S <sub>1</sub> x S <sub>3</sub>                                    | S <sub>1</sub> x S <sub>3</sub>                                    |
|                                       | dg | S <sub>1</sub> x S <sub>2</sub><br>S <sub>1</sub> x S <sub>3</sub> | -                                                                  | S <sub>1</sub> x S <sub>2</sub>                                    | -                                                                  | S <sub>1</sub> x S <sub>3</sub>                                    | S <sub>1</sub> x S <sub>3</sub>                                    | S <sub>1</sub> x S <sub>3</sub>                                    | S <sub>1</sub> x S <sub>3</sub>                                    | S <sub>1</sub> x S <sub>3</sub>                                    |
| S <sub>2</sub> derived                | be | S <sub>1</sub> x S <sub>2</sub>                                    | S <sub>1</sub> x S <sub>2</sub>                                    | S <sub>1</sub> x S <sub>2</sub><br>S <sub>2</sub> x S <sub>3</sub> | S <sub>1</sub> x S <sub>2</sub><br>S <sub>2</sub> x S <sub>3</sub> | S <sub>2</sub> x S <sub>3</sub>                                    | S <sub>2</sub> x S <sub>3</sub>                                    | S <sub>2</sub> x S <sub>3</sub>                                    | S <sub>2</sub> x S <sub>3</sub>                                    | S <sub>2</sub> x S <sub>3</sub>                                    |
|                                       | eg | S <sub>1</sub> x S <sub>2</sub>                                    | -                                                                  | S <sub>1</sub> x S <sub>2</sub><br>S <sub>2</sub> x S <sub>3</sub> | -                                                                  | S <sub>2</sub> x S <sub>3</sub>                                    | S <sub>2</sub> x S <sub>3</sub>                                    | S <sub>2</sub> x S <sub>3</sub>                                    | S <sub>2</sub> x S <sub>3</sub>                                    | S <sub>2</sub> x S <sub>3</sub>                                    |
| S <sub>3</sub> derived                | cf | S <sub>1</sub> x S <sub>3</sub>                                    | S <sub>1</sub> x S <sub>3</sub>                                    | S <sub>2</sub> x S <sub>3</sub>                                    | S <sub>2</sub> x S <sub>3</sub>                                    | S <sub>1</sub> x S <sub>3</sub><br>S <sub>2</sub> x S <sub>3</sub> | S <sub>1</sub> x S <sub>3</sub><br>S <sub>2</sub> x S <sub>3</sub> | S <sub>1</sub> x S <sub>3</sub><br>S <sub>2</sub> x S <sub>3</sub> | S <sub>1</sub> x S <sub>3</sub><br>S <sub>2</sub> x S <sub>3</sub> | S <sub>1</sub> x S <sub>3</sub><br>S <sub>2</sub> x S <sub>3</sub> |
|                                       | fi | S <sub>1</sub> x S <sub>3</sub>                                    | S <sub>1</sub> x S <sub>3</sub>                                    | S <sub>2</sub> x S <sub>3</sub>                                    | S <sub>2</sub> x S <sub>3</sub>                                    | S <sub>1</sub> x S <sub>3</sub><br>S <sub>2</sub> x S <sub>3</sub> | S <sub>1</sub> x S <sub>3</sub><br>S <sub>2</sub> x S <sub>3</sub> | S <sub>1</sub> x S <sub>3</sub><br>S <sub>2</sub> x S <sub>3</sub> | S <sub>1</sub> x S <sub>3</sub><br>S <sub>2</sub> x S <sub>3</sub> | S <sub>1</sub> x S <sub>3</sub><br>S <sub>2</sub> x S <sub>3</sub> |
|                                       | ij | S <sub>1</sub> x S <sub>3</sub>                                    | S <sub>1</sub> x S <sub>3</sub>                                    | S <sub>2</sub> x S <sub>3</sub>                                    | S <sub>2</sub> x S <sub>3</sub>                                    | S <sub>1</sub> x S <sub>3</sub><br>S <sub>2</sub> x S <sub>3</sub> | S <sub>1</sub> x S <sub>3</sub><br>S <sub>2</sub> x S <sub>3</sub> | -                                                                  | S <sub>1</sub> x S <sub>3</sub><br>S <sub>2</sub> x S <sub>3</sub> | -                                                                  |
| S <sub>1, S<sub>2</sub></sub> derived | gh | S <sub>1</sub> x S <sub>3</sub>                                    | S <sub>1</sub> x S <sub>3</sub>                                    | S <sub>2</sub> x S <sub>3</sub>                                    | S <sub>2</sub> x S <sub>3</sub>                                    | S <sub>1</sub> x S <sub>3</sub><br>S <sub>2</sub> x S <sub>3</sub> | S <sub>1</sub> x S <sub>3</sub><br>S <sub>2</sub> x S <sub>3</sub> | S <sub>1</sub> x S <sub>3</sub><br>S <sub>2</sub> x S <sub>3</sub> | S <sub>1</sub> x S <sub>3</sub><br>S <sub>2</sub> x S <sub>3</sub> | S <sub>1</sub> x S <sub>3</sub><br>S <sub>2</sub> x S <sub>3</sub> |
|                                       | hj | S <sub>1</sub> x S <sub>3</sub>                                    | S <sub>1</sub> x S <sub>3</sub>                                    | S <sub>2</sub> x S <sub>3</sub>                                    | S <sub>2</sub> x S <sub>3</sub>                                    | S <sub>1</sub> x S <sub>3</sub><br>S <sub>2</sub> x S <sub>3</sub> | S <sub>1</sub> x S <sub>3</sub><br>S <sub>2</sub> x S <sub>3</sub> | -                                                                  | S <sub>1</sub> x S <sub>3</sub><br>S <sub>2</sub> x S <sub>3</sub> | -                                                                  |

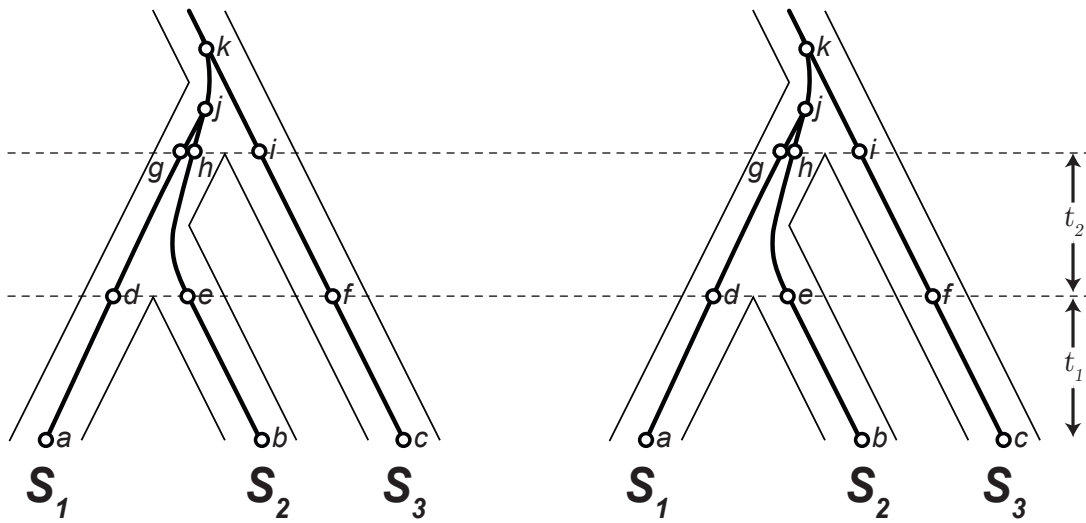

Rows: ( $S_1, S_2$ )  $S_3$  anc.

Columns: ( $S_1, S_2$ )  $S_3$  anc.

|                                       |    | S <sub>1</sub> derived                                             |                                                                    |                                                                    | S <sub>2</sub> derived                                             |                                                                    |                                                                    | S <sub>3</sub> derived                                             |                                                                    |                                                                    | S <sub>1, S<sub>2</sub></sub> derived                              |
|---------------------------------------|----|--------------------------------------------------------------------|--------------------------------------------------------------------|--------------------------------------------------------------------|--------------------------------------------------------------------|--------------------------------------------------------------------|--------------------------------------------------------------------|--------------------------------------------------------------------|--------------------------------------------------------------------|--------------------------------------------------------------------|--------------------------------------------------------------------|
|                                       |    | ad                                                                 | dg                                                                 | gj                                                                 | be                                                                 | eh                                                                 | hj                                                                 | cf                                                                 | fi                                                                 | ik                                                                 | jk                                                                 |
| S <sub>1</sub> derived                | ad | S <sub>1</sub> x S <sub>2</sub><br>S <sub>1</sub> x S <sub>3</sub> | S <sub>1</sub> x S <sub>2</sub><br>S <sub>1</sub> x S <sub>3</sub> | S <sub>1</sub> x S <sub>2</sub><br>S <sub>1</sub> x S <sub>3</sub> | S <sub>1</sub> x S <sub>2</sub>                                    | S <sub>1</sub> x S <sub>2</sub>                                    | S <sub>1</sub> x S <sub>2</sub>                                    | S <sub>1</sub> x S <sub>3</sub>                                    | S <sub>1</sub> x S <sub>3</sub>                                    | S <sub>1</sub> x S <sub>3</sub>                                    | S <sub>1</sub> x S <sub>3</sub>                                    |
|                                       | dg | S <sub>1</sub> x S <sub>2</sub><br>S <sub>1</sub> x S <sub>3</sub> | -                                                                  | -                                                                  | S <sub>1</sub> x S <sub>2</sub>                                    | -                                                                  | -                                                                  | S <sub>1</sub> x S <sub>3</sub>                                    | S <sub>1</sub> x S <sub>3</sub>                                    | S <sub>1</sub> x S <sub>3</sub>                                    | S <sub>1</sub> x S <sub>3</sub>                                    |
|                                       | gj | S <sub>1</sub> x S <sub>2</sub><br>S <sub>1</sub> x S <sub>3</sub> | -                                                                  | -                                                                  | S <sub>1</sub> x S <sub>2</sub>                                    | -                                                                  | -                                                                  | S <sub>1</sub> x S <sub>3</sub>                                    | S <sub>1</sub> x S <sub>3</sub>                                    | -                                                                  | -                                                                  |
| S <sub>2</sub> derived                | be | S <sub>1</sub> x S <sub>2</sub>                                    | S <sub>1</sub> x S <sub>2</sub>                                    | S <sub>1</sub> x S <sub>2</sub>                                    | S <sub>1</sub> x S <sub>2</sub><br>S <sub>2</sub> x S <sub>3</sub> | S <sub>1</sub> x S <sub>2</sub><br>S <sub>2</sub> x S <sub>3</sub> | S <sub>1</sub> x S <sub>2</sub><br>S <sub>2</sub> x S <sub>3</sub> | S <sub>2</sub> x S <sub>3</sub>                                    | S <sub>2</sub> x S <sub>3</sub>                                    | S <sub>2</sub> x S <sub>3</sub>                                    | S <sub>2</sub> x S <sub>3</sub>                                    |
|                                       | eh | S <sub>1</sub> x S <sub>2</sub>                                    | -                                                                  | -                                                                  | S <sub>1</sub> x S <sub>2</sub><br>S <sub>2</sub> x S <sub>3</sub> | -                                                                  | -                                                                  | S <sub>2</sub> x S <sub>3</sub>                                    | S <sub>2</sub> x S <sub>3</sub>                                    | S <sub>2</sub> x S <sub>3</sub>                                    | S <sub>2</sub> x S <sub>3</sub>                                    |
|                                       | hj | S <sub>1</sub> x S <sub>2</sub>                                    | -                                                                  | -                                                                  | S <sub>1</sub> x S <sub>2</sub><br>S <sub>2</sub> x S <sub>3</sub> | -                                                                  | -                                                                  | S <sub>2</sub> x S <sub>3</sub>                                    | S <sub>2</sub> x S <sub>3</sub>                                    | -                                                                  | -                                                                  |
| S <sub>3</sub> derived                | cf | S <sub>1</sub> x S <sub>3</sub>                                    | S <sub>1</sub> x S <sub>3</sub>                                    | S <sub>1</sub> x S <sub>3</sub>                                    | S <sub>2</sub> x S <sub>3</sub>                                    | S <sub>2</sub> x S <sub>3</sub>                                    | S <sub>2</sub> x S <sub>3</sub>                                    | S <sub>1</sub> x S <sub>3</sub><br>S <sub>2</sub> x S <sub>3</sub> | S <sub>1</sub> x S <sub>3</sub><br>S <sub>2</sub> x S <sub>3</sub> | S <sub>1</sub> x S <sub>3</sub><br>S <sub>2</sub> x S <sub>3</sub> | S <sub>1</sub> x S <sub>3</sub><br>S <sub>2</sub> x S <sub>3</sub> |
|                                       | fi | S <sub>1</sub> x S <sub>3</sub>                                    | S <sub>1</sub> x S <sub>3</sub>                                    | S <sub>1</sub> x S <sub>3</sub>                                    | S <sub>2</sub> x S <sub>3</sub>                                    | S <sub>2</sub> x S <sub>3</sub>                                    | S <sub>2</sub> x S <sub>3</sub>                                    | S <sub>1</sub> x S <sub>3</sub><br>S <sub>2</sub> x S <sub>3</sub> | S <sub>1</sub> x S <sub>3</sub><br>S <sub>2</sub> x S <sub>3</sub> | S <sub>1</sub> x S <sub>3</sub><br>S <sub>2</sub> x S <sub>3</sub> | S <sub>1</sub> x S <sub>3</sub><br>S <sub>2</sub> x S <sub>3</sub> |
|                                       | ik | S <sub>1</sub> x S <sub>3</sub>                                    | S <sub>1</sub> x S <sub>3</sub>                                    | -                                                                  | S <sub>2</sub> x S <sub>3</sub>                                    | S <sub>2</sub> x S <sub>3</sub>                                    | -                                                                  | S <sub>1</sub> x S <sub>3</sub><br>S <sub>2</sub> x S <sub>3</sub> | S <sub>1</sub> x S <sub>3</sub><br>S <sub>2</sub> x S <sub>3</sub> | -                                                                  | -                                                                  |
| S <sub>1, S<sub>2</sub></sub> derived | jk | S <sub>1</sub> x S <sub>3</sub>                                    | S <sub>1</sub> x S <sub>3</sub>                                    | -                                                                  | S <sub>2</sub> x S <sub>3</sub>                                    | S <sub>2</sub> x S <sub>3</sub>                                    | -                                                                  | S <sub>1</sub> x S <sub>3</sub><br>S <sub>2</sub> x S <sub>3</sub> | S <sub>1</sub> x S <sub>3</sub><br>S <sub>2</sub> x S <sub>3</sub> | -                                                                  | -                                                                  |

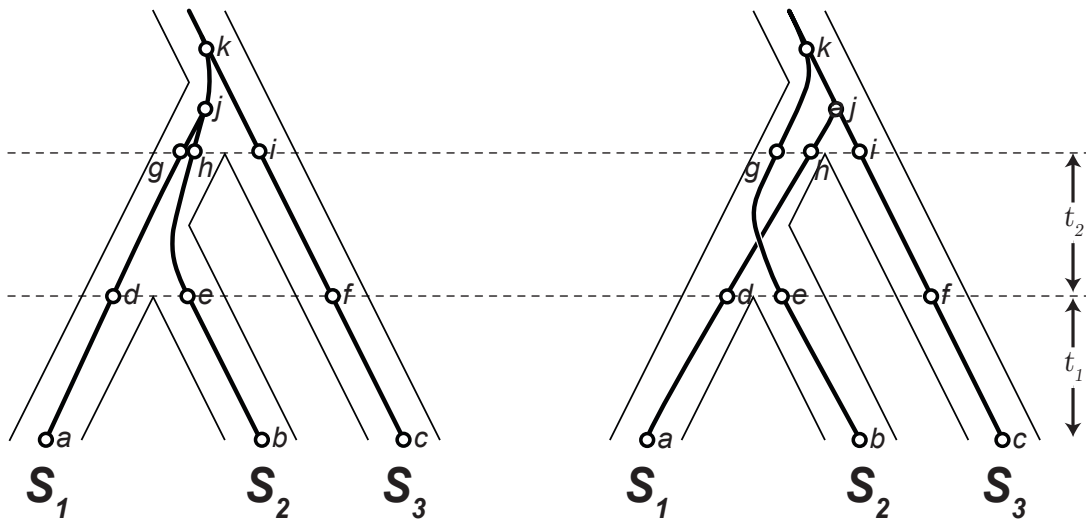

Rows: ( $S_1, S_2$ )  $S_3$  anc.

Columns: ( $S_1, S_3$ )  $S_2$

|                                       |    | S <sub>1</sub> derived                                             |                                                                    |                                                                    | S <sub>2</sub> derived                                             |                                                                    |                                                                    | S <sub>3</sub> derived                                             |                                                                    |                                                                    | S <sub>1, S<sub>3</sub></sub> derived                              |
|---------------------------------------|----|--------------------------------------------------------------------|--------------------------------------------------------------------|--------------------------------------------------------------------|--------------------------------------------------------------------|--------------------------------------------------------------------|--------------------------------------------------------------------|--------------------------------------------------------------------|--------------------------------------------------------------------|--------------------------------------------------------------------|--------------------------------------------------------------------|
|                                       |    | ad                                                                 | dh                                                                 | hj                                                                 | be                                                                 | eg                                                                 | gk                                                                 | cf                                                                 | fi                                                                 | ij                                                                 | jk                                                                 |
| S <sub>1</sub> derived                | ad | S <sub>1</sub> x S <sub>2</sub><br>S <sub>1</sub> x S <sub>3</sub> | S <sub>1</sub> x S <sub>2</sub><br>S <sub>1</sub> x S <sub>3</sub> | S <sub>1</sub> x S <sub>2</sub><br>S <sub>1</sub> x S <sub>3</sub> | S <sub>1</sub> x S <sub>2</sub>                                    | S <sub>1</sub> x S <sub>2</sub>                                    | S <sub>1</sub> x S <sub>2</sub>                                    | S <sub>1</sub> x S <sub>3</sub>                                    | S <sub>1</sub> x S <sub>3</sub>                                    | S <sub>1</sub> x S <sub>3</sub>                                    | S <sub>1</sub> x S <sub>2</sub>                                    |
|                                       | dg | S <sub>1</sub> x S <sub>2</sub><br>S <sub>1</sub> x S <sub>3</sub> | -                                                                  | -                                                                  | S <sub>1</sub> x S <sub>2</sub>                                    | -                                                                  | -                                                                  | S <sub>1</sub> x S <sub>3</sub>                                    | S <sub>1</sub> x S <sub>3</sub>                                    | S <sub>1</sub> x S <sub>3</sub>                                    | -                                                                  |
|                                       | gj | S <sub>1</sub> x S <sub>2</sub><br>S <sub>1</sub> x S <sub>3</sub> | -                                                                  | -                                                                  | S <sub>1</sub> x S <sub>2</sub>                                    | -                                                                  | -                                                                  | S <sub>1</sub> x S <sub>3</sub>                                    | S <sub>1</sub> x S <sub>3</sub>                                    | -                                                                  | -                                                                  |
| S <sub>2</sub> derived                | be | S <sub>1</sub> x S <sub>2</sub>                                    | S <sub>1</sub> x S <sub>2</sub>                                    | S <sub>1</sub> x S <sub>2</sub>                                    | S <sub>1</sub> x S <sub>2</sub><br>S <sub>2</sub> x S <sub>3</sub> | S <sub>1</sub> x S <sub>2</sub><br>S <sub>2</sub> x S <sub>3</sub> | S <sub>1</sub> x S <sub>2</sub><br>S <sub>2</sub> x S <sub>3</sub> | S <sub>2</sub> x S <sub>3</sub>                                    | S <sub>2</sub> x S <sub>3</sub>                                    | S <sub>2</sub> x S <sub>3</sub>                                    | S <sub>1</sub> x S <sub>2</sub><br>S <sub>2</sub> x S <sub>3</sub> |
|                                       | eh | S <sub>1</sub> x S <sub>2</sub>                                    | -                                                                  | -                                                                  | S <sub>1</sub> x S <sub>2</sub><br>S <sub>2</sub> x S <sub>3</sub> | -                                                                  | -                                                                  | S <sub>2</sub> x S <sub>3</sub>                                    | S <sub>2</sub> x S <sub>3</sub>                                    | S <sub>2</sub> x S <sub>3</sub>                                    | -                                                                  |
|                                       | hj | S <sub>1</sub> x S <sub>2</sub>                                    | -                                                                  | -                                                                  | S <sub>1</sub> x S <sub>2</sub><br>S <sub>2</sub> x S <sub>3</sub> | -                                                                  | -                                                                  | S <sub>2</sub> x S <sub>3</sub>                                    | S <sub>2</sub> x S <sub>3</sub>                                    | -                                                                  | -                                                                  |
| S <sub>3</sub> derived                | cf | S <sub>1</sub> x S <sub>3</sub>                                    | S <sub>1</sub> x S <sub>3</sub>                                    | S <sub>1</sub> x S <sub>3</sub>                                    | S <sub>2</sub> x S <sub>3</sub>                                    | S <sub>2</sub> x S <sub>3</sub>                                    | S <sub>2</sub> x S <sub>3</sub>                                    | S <sub>1</sub> x S <sub>3</sub><br>S <sub>2</sub> x S <sub>3</sub> | S <sub>1</sub> x S <sub>3</sub><br>S <sub>2</sub> x S <sub>3</sub> | S <sub>1</sub> x S <sub>3</sub><br>S <sub>2</sub> x S <sub>3</sub> | S <sub>2</sub> x S <sub>3</sub>                                    |
|                                       | fi | S <sub>1</sub> x S <sub>3</sub>                                    | S <sub>1</sub> x S <sub>3</sub>                                    | S <sub>1</sub> x S <sub>3</sub>                                    | S <sub>2</sub> x S <sub>3</sub>                                    | S <sub>2</sub> x S <sub>3</sub>                                    | S <sub>2</sub> x S <sub>3</sub>                                    | S <sub>1</sub> x S <sub>3</sub><br>S <sub>2</sub> x S <sub>3</sub> | S <sub>1</sub> x S <sub>3</sub><br>S <sub>2</sub> x S <sub>3</sub> | S <sub>1</sub> x S <sub>3</sub><br>S <sub>2</sub> x S <sub>3</sub> | S <sub>2</sub> x S <sub>3</sub>                                    |
|                                       | ik | S <sub>1</sub> x S <sub>3</sub>                                    | S <sub>1</sub> x S <sub>3</sub>                                    | -                                                                  | S <sub>2</sub> x S <sub>3</sub>                                    | S <sub>2</sub> x S <sub>3</sub>                                    | -                                                                  | S <sub>1</sub> x S <sub>3</sub><br>S <sub>2</sub> x S <sub>3</sub> | S <sub>1</sub> x S <sub>3</sub><br>S <sub>2</sub> x S <sub>3</sub> | -                                                                  | -                                                                  |
| S <sub>1, S<sub>2</sub></sub> derived | jk | S <sub>1</sub> x S <sub>3</sub>                                    | S <sub>1</sub> x S <sub>3</sub>                                    | -                                                                  | S <sub>2</sub> x S <sub>3</sub>                                    | S <sub>2</sub> x S <sub>3</sub>                                    | -                                                                  | S <sub>1</sub> x S <sub>3</sub><br>S <sub>2</sub> x S <sub>3</sub> | S <sub>1</sub> x S <sub>3</sub><br>S <sub>2</sub> x S <sub>3</sub> | -                                                                  | -                                                                  |

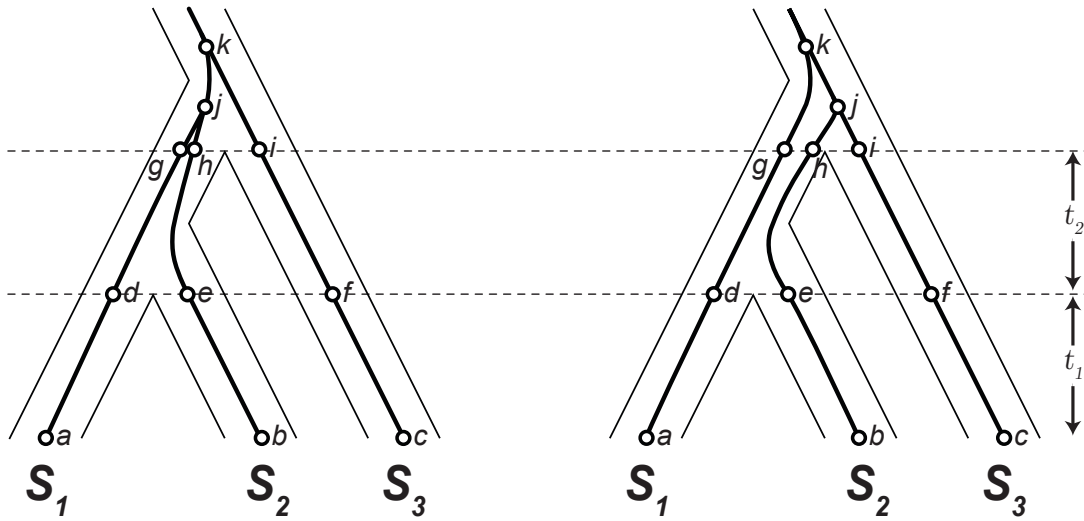

Rows: ( $S_1, S_2$ )  $S_3$  anc.

Columns: ( $S_2, S_3$ )  $S_1$

|                                       |    | S <sub>1</sub> derived                                             |                                                                    |                                                                    | S <sub>2</sub> derived                                             |                                                                    |                                                                    | S <sub>3</sub> derived                                             |                                                                    |                                                                    | S <sub>2, S<sub>3</sub></sub> derived                              |
|---------------------------------------|----|--------------------------------------------------------------------|--------------------------------------------------------------------|--------------------------------------------------------------------|--------------------------------------------------------------------|--------------------------------------------------------------------|--------------------------------------------------------------------|--------------------------------------------------------------------|--------------------------------------------------------------------|--------------------------------------------------------------------|--------------------------------------------------------------------|
|                                       |    | ad                                                                 | dg                                                                 | gk                                                                 | be                                                                 | eh                                                                 | hj                                                                 | cf                                                                 | fi                                                                 | ij                                                                 | jk                                                                 |
| S <sub>1</sub> derived                | ad | S <sub>1</sub> x S <sub>2</sub><br>S <sub>1</sub> x S <sub>3</sub> | S <sub>1</sub> x S <sub>2</sub><br>S <sub>1</sub> x S <sub>3</sub> | S <sub>1</sub> x S <sub>2</sub><br>S <sub>1</sub> x S <sub>3</sub> | S <sub>1</sub> x S <sub>2</sub>                                    | S <sub>1</sub> x S <sub>2</sub>                                    | S <sub>1</sub> x S <sub>2</sub>                                    | S <sub>1</sub> x S <sub>3</sub>                                    | S <sub>1</sub> x S <sub>3</sub>                                    | S <sub>1</sub> x S <sub>3</sub>                                    | S <sub>1</sub> x S <sub>2</sub><br>S <sub>1</sub> x S <sub>3</sub> |
|                                       | dg | S <sub>1</sub> x S <sub>2</sub><br>S <sub>1</sub> x S <sub>3</sub> | -                                                                  | -                                                                  | S <sub>1</sub> x S <sub>2</sub>                                    | -                                                                  | -                                                                  | S <sub>1</sub> x S <sub>3</sub>                                    | S <sub>1</sub> x S <sub>3</sub>                                    | S <sub>1</sub> x S <sub>3</sub>                                    | -                                                                  |
|                                       | gj | S <sub>1</sub> x S <sub>2</sub><br>S <sub>1</sub> x S <sub>3</sub> | -                                                                  | -                                                                  | S <sub>1</sub> x S <sub>2</sub>                                    | -                                                                  | -                                                                  | S <sub>1</sub> x S <sub>3</sub>                                    | S <sub>1</sub> x S <sub>3</sub>                                    | -                                                                  | -                                                                  |
| S <sub>2</sub> derived                | be | S <sub>1</sub> x S <sub>2</sub>                                    | S <sub>1</sub> x S <sub>2</sub>                                    | S <sub>1</sub> x S <sub>2</sub>                                    | S <sub>1</sub> x S <sub>2</sub><br>S <sub>2</sub> x S <sub>3</sub> | S <sub>1</sub> x S <sub>2</sub><br>S <sub>2</sub> x S <sub>3</sub> | S <sub>1</sub> x S <sub>2</sub><br>S <sub>2</sub> x S <sub>3</sub> | S <sub>2</sub> x S <sub>3</sub>                                    | S <sub>2</sub> x S <sub>3</sub>                                    | S <sub>2</sub> x S <sub>3</sub>                                    | S <sub>1</sub> x S <sub>2</sub>                                    |
|                                       | eh | S <sub>1</sub> x S <sub>2</sub>                                    | -                                                                  | -                                                                  | S <sub>1</sub> x S <sub>2</sub><br>S <sub>2</sub> x S <sub>3</sub> | -                                                                  | -                                                                  | S <sub>2</sub> x S <sub>3</sub>                                    | S <sub>2</sub> x S <sub>3</sub>                                    | S <sub>2</sub> x S <sub>3</sub>                                    | -                                                                  |
|                                       | hj | S <sub>1</sub> x S <sub>2</sub>                                    | -                                                                  | -                                                                  | S <sub>1</sub> x S <sub>2</sub><br>S <sub>2</sub> x S <sub>3</sub> | -                                                                  | -                                                                  | S <sub>2</sub> x S <sub>3</sub>                                    | S <sub>2</sub> x S <sub>3</sub>                                    | -                                                                  | -                                                                  |
| S <sub>3</sub> derived                | cf | S <sub>1</sub> x S <sub>3</sub>                                    | S <sub>1</sub> x S <sub>3</sub>                                    | S <sub>1</sub> x S <sub>3</sub>                                    | S <sub>2</sub> x S <sub>3</sub>                                    | S <sub>2</sub> x S <sub>3</sub>                                    | S <sub>2</sub> x S <sub>3</sub>                                    | S <sub>1</sub> x S <sub>3</sub><br>S <sub>2</sub> x S <sub>3</sub> | S <sub>1</sub> x S <sub>3</sub><br>S <sub>2</sub> x S <sub>3</sub> | S <sub>1</sub> x S <sub>3</sub><br>S <sub>2</sub> x S <sub>3</sub> | S <sub>1</sub> x S <sub>3</sub>                                    |
|                                       | fi | S <sub>1</sub> x S <sub>3</sub>                                    | S <sub>1</sub> x S <sub>3</sub>                                    | S <sub>1</sub> x S <sub>3</sub>                                    | S <sub>2</sub> x S <sub>3</sub>                                    | S <sub>2</sub> x S <sub>3</sub>                                    | S <sub>2</sub> x S <sub>3</sub>                                    | S <sub>1</sub> x S <sub>3</sub><br>S <sub>2</sub> x S <sub>3</sub> | S <sub>1</sub> x S <sub>3</sub><br>S <sub>2</sub> x S <sub>3</sub> | S <sub>1</sub> x S <sub>3</sub><br>S <sub>2</sub> x S <sub>3</sub> | S <sub>1</sub> x S <sub>3</sub>                                    |
|                                       | ik | S <sub>1</sub> x S <sub>3</sub>                                    | S <sub>1</sub> x S <sub>3</sub>                                    | -                                                                  | S <sub>2</sub> x S <sub>3</sub>                                    | S <sub>2</sub> x S <sub>3</sub>                                    | -                                                                  | S <sub>1</sub> x S <sub>3</sub><br>S <sub>2</sub> x S <sub>3</sub> | S <sub>1</sub> x S <sub>3</sub><br>S <sub>2</sub> x S <sub>3</sub> | -                                                                  | -                                                                  |
| S <sub>1, S<sub>2</sub></sub> derived | jk | S <sub>1</sub> x S <sub>3</sub>                                    | S <sub>1</sub> x S <sub>3</sub>                                    | -                                                                  | S <sub>2</sub> x S <sub>3</sub>                                    | S <sub>2</sub> x S <sub>3</sub>                                    | -                                                                  | S <sub>1</sub> x S <sub>3</sub><br>S <sub>2</sub> x S <sub>3</sub> | S <sub>1</sub> x S <sub>3</sub><br>S <sub>2</sub> x S <sub>3</sub> | -                                                                  | -                                                                  |

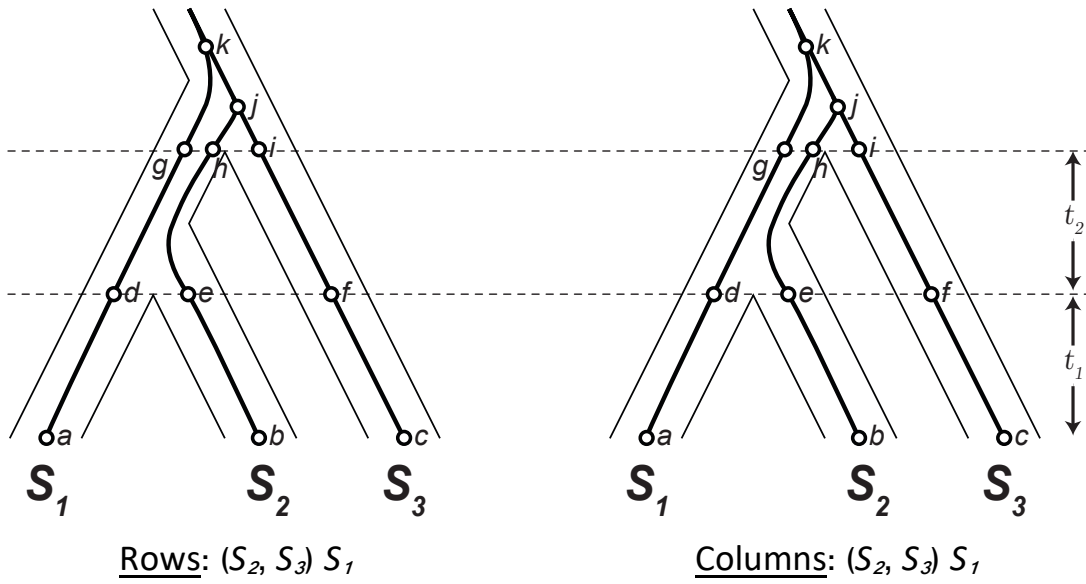

|                                         |    | S <sub>1</sub> derived                                             |                                                                    |                                                                    | S <sub>2</sub> derived                                             |                                                                    |                                                                    | S <sub>3</sub> derived                                             |                                                                    |                                                                    | S <sub>2</sub> , S <sub>3</sub> derived                            |
|-----------------------------------------|----|--------------------------------------------------------------------|--------------------------------------------------------------------|--------------------------------------------------------------------|--------------------------------------------------------------------|--------------------------------------------------------------------|--------------------------------------------------------------------|--------------------------------------------------------------------|--------------------------------------------------------------------|--------------------------------------------------------------------|--------------------------------------------------------------------|
|                                         |    | ad                                                                 | dg                                                                 | gk                                                                 | be                                                                 | eh                                                                 | hj                                                                 | cf                                                                 | fi                                                                 | ij                                                                 | jk                                                                 |
| S <sub>1</sub> derived                  | ad | S <sub>1</sub> x S <sub>2</sub><br>S <sub>1</sub> x S <sub>3</sub> | S <sub>1</sub> x S <sub>2</sub><br>S <sub>1</sub> x S <sub>3</sub> | S <sub>1</sub> x S <sub>2</sub><br>S <sub>1</sub> x S <sub>3</sub> | S <sub>1</sub> x S <sub>2</sub>                                    | S <sub>1</sub> x S <sub>2</sub>                                    | S <sub>1</sub> x S <sub>2</sub>                                    | S <sub>1</sub> x S <sub>3</sub>                                    | S <sub>1</sub> x S <sub>3</sub>                                    | S <sub>1</sub> x S <sub>3</sub>                                    | S <sub>1</sub> x S <sub>2</sub><br>S <sub>1</sub> x S <sub>3</sub> |
|                                         | dg | S <sub>1</sub> x S <sub>2</sub><br>S <sub>1</sub> x S <sub>3</sub> | -                                                                  | -                                                                  | S <sub>1</sub> x S <sub>2</sub>                                    | -                                                                  | -                                                                  | S <sub>1</sub> x S <sub>3</sub>                                    | S <sub>1</sub> x S <sub>3</sub>                                    | S <sub>1</sub> x S <sub>3</sub>                                    | -                                                                  |
|                                         | gk | S <sub>1</sub> x S <sub>2</sub><br>S <sub>1</sub> x S <sub>3</sub> | -                                                                  | -                                                                  | S <sub>1</sub> x S <sub>2</sub>                                    | -                                                                  | -                                                                  | S <sub>1</sub> x S <sub>3</sub>                                    | S <sub>1</sub> x S <sub>3</sub>                                    | -                                                                  | -                                                                  |
| S <sub>2</sub> derived                  | be | S <sub>1</sub> x S <sub>2</sub>                                    | S <sub>1</sub> x S <sub>2</sub>                                    | S <sub>1</sub> x S <sub>2</sub>                                    | S <sub>1</sub> x S <sub>2</sub><br>S <sub>2</sub> x S <sub>3</sub> | S <sub>1</sub> x S <sub>2</sub><br>S <sub>2</sub> x S <sub>3</sub> | S <sub>1</sub> x S <sub>2</sub><br>S <sub>2</sub> x S <sub>3</sub> | S <sub>2</sub> x S <sub>3</sub>                                    | S <sub>2</sub> x S <sub>3</sub>                                    | S <sub>2</sub> x S <sub>3</sub>                                    | S <sub>1</sub> x S <sub>2</sub>                                    |
|                                         | eh | S <sub>1</sub> x S <sub>2</sub>                                    | -                                                                  | -                                                                  | S <sub>1</sub> x S <sub>2</sub><br>S <sub>2</sub> x S <sub>3</sub> | -                                                                  | -                                                                  | S <sub>2</sub> x S <sub>3</sub>                                    | S <sub>2</sub> x S <sub>3</sub>                                    | S <sub>2</sub> x S <sub>3</sub>                                    | -                                                                  |
|                                         | hj | S <sub>1</sub> x S <sub>2</sub>                                    | -                                                                  | -                                                                  | S <sub>1</sub> x S <sub>2</sub><br>S <sub>2</sub> x S <sub>3</sub> | -                                                                  | -                                                                  | S <sub>2</sub> x S <sub>3</sub>                                    | S <sub>2</sub> x S <sub>3</sub>                                    | -                                                                  | -                                                                  |
| S <sub>3</sub> derived                  | cf | S <sub>1</sub> x S <sub>3</sub>                                    | S <sub>1</sub> x S <sub>3</sub>                                    | S <sub>1</sub> x S <sub>3</sub>                                    | S <sub>2</sub> x S <sub>3</sub>                                    | S <sub>2</sub> x S <sub>3</sub>                                    | S <sub>2</sub> x S <sub>3</sub>                                    | S <sub>1</sub> x S <sub>3</sub><br>S <sub>2</sub> x S <sub>3</sub> | S <sub>1</sub> x S <sub>3</sub><br>S <sub>2</sub> x S <sub>3</sub> | S <sub>1</sub> x S <sub>3</sub><br>S <sub>2</sub> x S <sub>3</sub> | S <sub>1</sub> x S <sub>3</sub>                                    |
|                                         | fi | S <sub>1</sub> x S <sub>3</sub>                                    | S <sub>1</sub> x S <sub>3</sub>                                    | S <sub>1</sub> x S <sub>3</sub>                                    | S <sub>2</sub> x S <sub>3</sub>                                    | S <sub>2</sub> x S <sub>3</sub>                                    | S <sub>2</sub> x S <sub>3</sub>                                    | S <sub>1</sub> x S <sub>3</sub><br>S <sub>2</sub> x S <sub>3</sub> | S <sub>1</sub> x S <sub>3</sub><br>S <sub>2</sub> x S <sub>3</sub> | S <sub>1</sub> x S <sub>3</sub><br>S <sub>2</sub> x S <sub>3</sub> | S <sub>1</sub> x S <sub>3</sub>                                    |
|                                         | ij | S <sub>1</sub> x S <sub>3</sub>                                    | S <sub>1</sub> x S <sub>3</sub>                                    | -                                                                  | S <sub>2</sub> x S <sub>3</sub>                                    | S <sub>2</sub> x S <sub>3</sub>                                    | -                                                                  | S <sub>1</sub> x S <sub>3</sub><br>S <sub>2</sub> x S <sub>3</sub> | S <sub>1</sub> x S <sub>3</sub><br>S <sub>2</sub> x S <sub>3</sub> | -                                                                  | -                                                                  |
| S <sub>2</sub> , S <sub>3</sub> derived | jk | S <sub>1</sub> x S <sub>2</sub><br>S <sub>1</sub> x S <sub>3</sub> | -                                                                  | -                                                                  | S <sub>1</sub> x S <sub>2</sub>                                    | -                                                                  | -                                                                  | S <sub>1</sub> x S <sub>3</sub>                                    | S <sub>1</sub> x S <sub>3</sub>                                    | -                                                                  | -                                                                  |



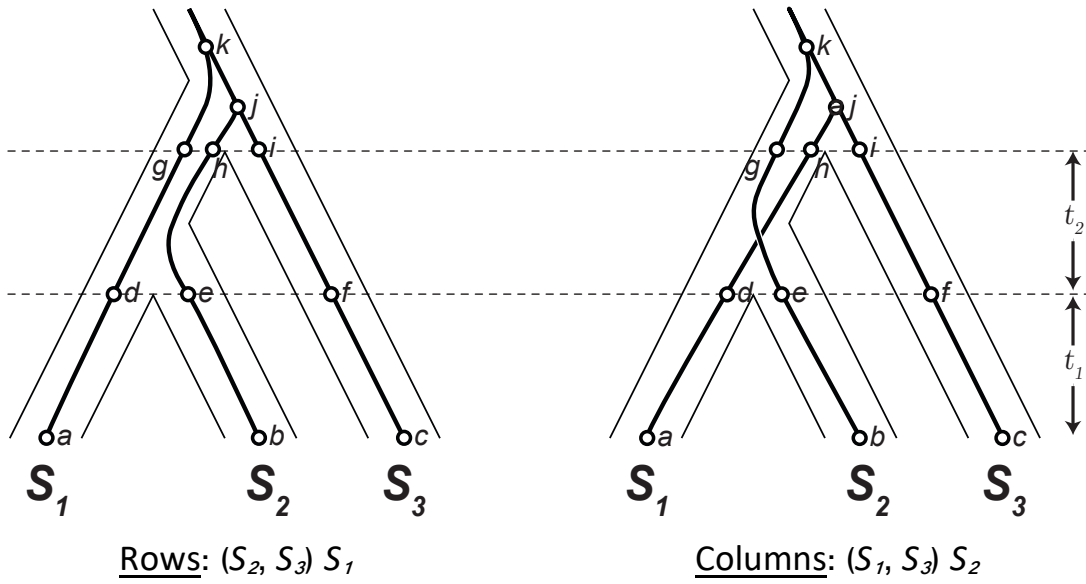

|                                       |    | S <sub>1</sub> derived                                             |                                                                    |                                                                    | S <sub>2</sub> derived                                             |                                                                    |                                                                    | S <sub>3</sub> derived                                             |                                                                    |                                                                    | S <sub>1, S<sub>3</sub></sub> derived                              |
|---------------------------------------|----|--------------------------------------------------------------------|--------------------------------------------------------------------|--------------------------------------------------------------------|--------------------------------------------------------------------|--------------------------------------------------------------------|--------------------------------------------------------------------|--------------------------------------------------------------------|--------------------------------------------------------------------|--------------------------------------------------------------------|--------------------------------------------------------------------|
|                                       |    | ad                                                                 | dh                                                                 | hj                                                                 | be                                                                 | eg                                                                 | gk                                                                 | cf                                                                 | fi                                                                 | ij                                                                 | jk                                                                 |
| S <sub>1</sub> derived                | ad | S <sub>1</sub> x S <sub>2</sub><br>S <sub>1</sub> x S <sub>3</sub> | S <sub>1</sub> x S <sub>2</sub><br>S <sub>1</sub> x S <sub>3</sub> | S <sub>1</sub> x S <sub>2</sub><br>S <sub>1</sub> x S <sub>3</sub> | S <sub>1</sub> x S <sub>2</sub>                                    | S <sub>1</sub> x S <sub>2</sub>                                    | S <sub>1</sub> x S <sub>2</sub>                                    | S <sub>1</sub> x S <sub>3</sub>                                    | S <sub>1</sub> x S <sub>3</sub>                                    | S <sub>1</sub> x S <sub>3</sub>                                    | S <sub>1</sub> x S <sub>2</sub>                                    |
|                                       | dg | S <sub>1</sub> x S <sub>2</sub><br>S <sub>1</sub> x S <sub>3</sub> | -                                                                  | -                                                                  | S <sub>1</sub> x S <sub>2</sub>                                    | -                                                                  | -                                                                  | S <sub>1</sub> x S <sub>3</sub>                                    | S <sub>1</sub> x S <sub>3</sub>                                    | S <sub>1</sub> x S <sub>3</sub>                                    | -                                                                  |
|                                       | gk | S <sub>1</sub> x S <sub>2</sub><br>S <sub>1</sub> x S <sub>3</sub> | -                                                                  | -                                                                  | S <sub>1</sub> x S <sub>2</sub>                                    | -                                                                  | -                                                                  | S <sub>1</sub> x S <sub>3</sub>                                    | S <sub>1</sub> x S <sub>3</sub>                                    | -                                                                  | -                                                                  |
| S <sub>2</sub> derived                | be | S <sub>1</sub> x S <sub>2</sub>                                    | S <sub>1</sub> x S <sub>2</sub>                                    | S <sub>1</sub> x S <sub>2</sub>                                    | S <sub>1</sub> x S <sub>2</sub><br>S <sub>2</sub> x S <sub>3</sub> | S <sub>1</sub> x S <sub>2</sub><br>S <sub>2</sub> x S <sub>3</sub> | S <sub>1</sub> x S <sub>2</sub><br>S <sub>2</sub> x S <sub>3</sub> | S <sub>2</sub> x S <sub>3</sub>                                    | S <sub>2</sub> x S <sub>3</sub>                                    | S <sub>2</sub> x S <sub>3</sub>                                    | S <sub>1</sub> x S <sub>2</sub><br>S <sub>2</sub> x S <sub>3</sub> |
|                                       | eh | S <sub>1</sub> x S <sub>2</sub>                                    | -                                                                  | -                                                                  | S <sub>1</sub> x S <sub>2</sub><br>S <sub>2</sub> x S <sub>3</sub> | -                                                                  | -                                                                  | S <sub>2</sub> x S <sub>3</sub>                                    | S <sub>2</sub> x S <sub>3</sub>                                    | S <sub>2</sub> x S <sub>3</sub>                                    | -                                                                  |
|                                       | hj | S <sub>1</sub> x S <sub>2</sub>                                    | -                                                                  | -                                                                  | S <sub>1</sub> x S <sub>2</sub><br>S <sub>2</sub> x S <sub>3</sub> | -                                                                  | -                                                                  | S <sub>2</sub> x S <sub>3</sub>                                    | S <sub>2</sub> x S <sub>3</sub>                                    | -                                                                  | -                                                                  |
| S <sub>3</sub> derived                | cf | S <sub>1</sub> x S <sub>3</sub>                                    | S <sub>1</sub> x S <sub>3</sub>                                    | S <sub>1</sub> x S <sub>3</sub>                                    | S <sub>2</sub> x S <sub>3</sub>                                    | S <sub>2</sub> x S <sub>3</sub>                                    | S <sub>2</sub> x S <sub>3</sub>                                    | S <sub>1</sub> x S <sub>3</sub><br>S <sub>2</sub> x S <sub>3</sub> | S <sub>1</sub> x S <sub>3</sub><br>S <sub>2</sub> x S <sub>3</sub> | S <sub>1</sub> x S <sub>3</sub><br>S <sub>2</sub> x S <sub>3</sub> | S <sub>2</sub> x S <sub>3</sub>                                    |
|                                       | fi | S <sub>1</sub> x S <sub>3</sub>                                    | S <sub>1</sub> x S <sub>3</sub>                                    | S <sub>1</sub> x S <sub>3</sub>                                    | S <sub>2</sub> x S <sub>3</sub>                                    | S <sub>2</sub> x S <sub>3</sub>                                    | S <sub>2</sub> x S <sub>3</sub>                                    | S <sub>1</sub> x S <sub>3</sub><br>S <sub>2</sub> x S <sub>3</sub> | S <sub>1</sub> x S <sub>3</sub><br>S <sub>2</sub> x S <sub>3</sub> | S <sub>1</sub> x S <sub>3</sub><br>S <sub>2</sub> x S <sub>3</sub> | S <sub>2</sub> x S <sub>3</sub>                                    |
|                                       | ij | S <sub>1</sub> x S <sub>3</sub>                                    | S <sub>1</sub> x S <sub>3</sub>                                    | -                                                                  | S <sub>2</sub> x S <sub>3</sub>                                    | S <sub>2</sub> x S <sub>3</sub>                                    | -                                                                  | S <sub>1</sub> x S <sub>3</sub><br>S <sub>2</sub> x S <sub>3</sub> | S <sub>1</sub> x S <sub>3</sub><br>S <sub>2</sub> x S <sub>3</sub> | -                                                                  | -                                                                  |
| S <sub>2, S<sub>3</sub></sub> derived | jk | S <sub>1</sub> x S <sub>2</sub><br>S <sub>1</sub> x S <sub>3</sub> | -                                                                  | -                                                                  | S <sub>1</sub> x S <sub>2</sub>                                    | -                                                                  | -                                                                  | S <sub>1</sub> x S <sub>3</sub>                                    | S <sub>1</sub> x S <sub>3</sub>                                    | -                                                                  | -                                                                  |

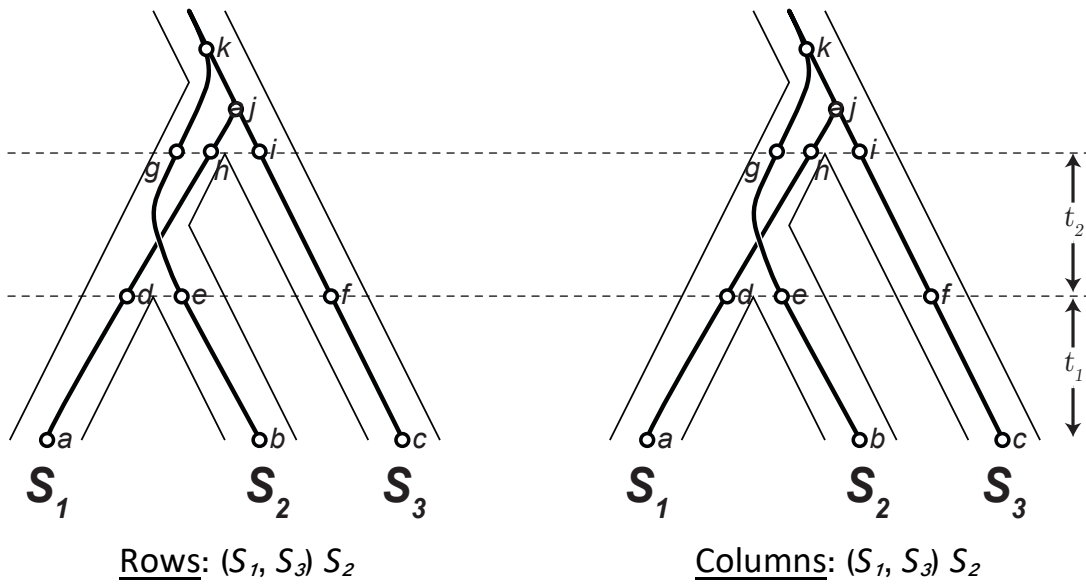

|                                       |    | S <sub>1</sub> derived                                             |                                                                    |                                                                    | S <sub>2</sub> derived                                             |                                                                    |                                                                    | S <sub>3</sub> derived                                             |                                                                    |                                                                    | S <sub>1, S<sub>3</sub></sub> derived                              |
|---------------------------------------|----|--------------------------------------------------------------------|--------------------------------------------------------------------|--------------------------------------------------------------------|--------------------------------------------------------------------|--------------------------------------------------------------------|--------------------------------------------------------------------|--------------------------------------------------------------------|--------------------------------------------------------------------|--------------------------------------------------------------------|--------------------------------------------------------------------|
|                                       |    | ad                                                                 | dh                                                                 | hj                                                                 | be                                                                 | eg                                                                 | gk                                                                 | cf                                                                 | fi                                                                 | ij                                                                 | jk                                                                 |
| S <sub>1</sub> derived                | ad | S <sub>1</sub> x S <sub>2</sub><br>S <sub>1</sub> x S <sub>3</sub> | S <sub>1</sub> x S <sub>2</sub><br>S <sub>1</sub> x S <sub>3</sub> | S <sub>1</sub> x S <sub>2</sub><br>S <sub>1</sub> x S <sub>3</sub> | S <sub>1</sub> x S <sub>2</sub>                                    | S <sub>1</sub> x S <sub>2</sub>                                    | S <sub>1</sub> x S <sub>2</sub>                                    | S <sub>1</sub> x S <sub>3</sub>                                    | S <sub>1</sub> x S <sub>3</sub>                                    | S <sub>1</sub> x S <sub>3</sub>                                    | S <sub>1</sub> x S <sub>2</sub>                                    |
|                                       | dh | S <sub>1</sub> x S <sub>2</sub><br>S <sub>1</sub> x S <sub>3</sub> | -                                                                  | -                                                                  | S <sub>1</sub> x S <sub>2</sub>                                    | -                                                                  | -                                                                  | S <sub>1</sub> x S <sub>3</sub>                                    | S <sub>1</sub> x S <sub>3</sub>                                    | S <sub>1</sub> x S <sub>3</sub>                                    | -                                                                  |
|                                       | hj | S <sub>1</sub> x S <sub>2</sub><br>S <sub>1</sub> x S <sub>3</sub> | -                                                                  | -                                                                  | S <sub>1</sub> x S <sub>2</sub>                                    | -                                                                  | -                                                                  | S <sub>1</sub> x S <sub>3</sub>                                    | S <sub>1</sub> x S <sub>3</sub>                                    | -                                                                  | -                                                                  |
| S <sub>2</sub> derived                | be | S <sub>1</sub> x S <sub>2</sub>                                    | S <sub>1</sub> x S <sub>2</sub>                                    | S <sub>1</sub> x S <sub>2</sub>                                    | S <sub>1</sub> x S <sub>2</sub><br>S <sub>2</sub> x S <sub>3</sub> | S <sub>1</sub> x S <sub>2</sub><br>S <sub>2</sub> x S <sub>3</sub> | S <sub>1</sub> x S <sub>2</sub><br>S <sub>2</sub> x S <sub>3</sub> | S <sub>2</sub> x S <sub>3</sub>                                    | S <sub>2</sub> x S <sub>3</sub>                                    | S <sub>2</sub> x S <sub>3</sub>                                    | S <sub>1</sub> x S <sub>2</sub><br>S <sub>2</sub> x S <sub>3</sub> |
|                                       | eg | S <sub>1</sub> x S <sub>2</sub>                                    | -                                                                  | -                                                                  | S <sub>1</sub> x S <sub>2</sub><br>S <sub>2</sub> x S <sub>3</sub> | -                                                                  | -                                                                  | S <sub>2</sub> x S <sub>3</sub>                                    | S <sub>2</sub> x S <sub>3</sub>                                    | S <sub>2</sub> x S <sub>3</sub>                                    | -                                                                  |
|                                       | gk | S <sub>1</sub> x S <sub>2</sub>                                    | -                                                                  | -                                                                  | S <sub>1</sub> x S <sub>2</sub><br>S <sub>2</sub> x S <sub>3</sub> | -                                                                  | -                                                                  | S <sub>2</sub> x S <sub>3</sub>                                    | S <sub>2</sub> x S <sub>3</sub>                                    | -                                                                  | -                                                                  |
| S <sub>3</sub> derived                | cf | S <sub>1</sub> x S <sub>3</sub>                                    | S <sub>1</sub> x S <sub>3</sub>                                    | S <sub>1</sub> x S <sub>3</sub>                                    | S <sub>2</sub> x S <sub>3</sub>                                    | S <sub>2</sub> x S <sub>3</sub>                                    | S <sub>2</sub> x S <sub>3</sub>                                    | S <sub>1</sub> x S <sub>3</sub><br>S <sub>2</sub> x S <sub>3</sub> | S <sub>1</sub> x S <sub>3</sub><br>S <sub>2</sub> x S <sub>3</sub> | S <sub>1</sub> x S <sub>3</sub><br>S <sub>2</sub> x S <sub>3</sub> | S <sub>2</sub> x S <sub>3</sub>                                    |
|                                       | fi | S <sub>1</sub> x S <sub>3</sub>                                    | S <sub>1</sub> x S <sub>3</sub>                                    | S <sub>1</sub> x S <sub>3</sub>                                    | S <sub>2</sub> x S <sub>3</sub>                                    | S <sub>2</sub> x S <sub>3</sub>                                    | S <sub>2</sub> x S <sub>3</sub>                                    | S <sub>1</sub> x S <sub>3</sub><br>S <sub>2</sub> x S <sub>3</sub> | S <sub>1</sub> x S <sub>3</sub><br>S <sub>2</sub> x S <sub>3</sub> | S <sub>1</sub> x S <sub>3</sub><br>S <sub>2</sub> x S <sub>3</sub> | S <sub>2</sub> x S <sub>3</sub>                                    |
|                                       | ij | S <sub>1</sub> x S <sub>3</sub>                                    | S <sub>1</sub> x S <sub>3</sub>                                    | -                                                                  | S <sub>2</sub> x S <sub>3</sub>                                    | S <sub>2</sub> x S <sub>3</sub>                                    | -                                                                  | S <sub>1</sub> x S <sub>3</sub><br>S <sub>2</sub> x S <sub>3</sub> | S <sub>1</sub> x S <sub>3</sub><br>S <sub>2</sub> x S <sub>3</sub> | -                                                                  | -                                                                  |
| S <sub>1, S<sub>3</sub></sub> derived | jk | S <sub>1</sub> x S <sub>2</sub>                                    | -                                                                  | -                                                                  | S <sub>1</sub> x S <sub>2</sub><br>S <sub>2</sub> x S <sub>3</sub> | -                                                                  | -                                                                  | S <sub>2</sub> x S <sub>3</sub>                                    | S <sub>2</sub> x S <sub>3</sub>                                    | -                                                                  | -                                                                  |
