# Supplementary material for: Speciation genes are more likely to have discordant gene trees
Source: PubMed Central journal article supplement (PMC6121824; doi:10.1002/evl3.77), 2018-08-08
Supplement: EVL3-2-281-s013.pdf [file EVL3-2-281-s013.pdf]

## Appendix 2. Incompatibility Matrices with incompatibilities allowed to arise in the same population

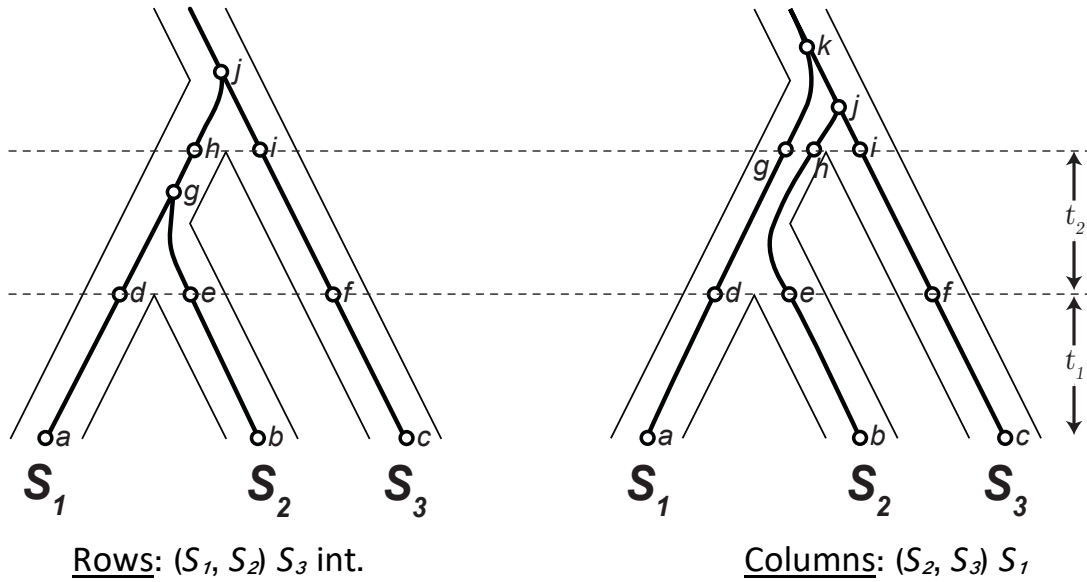

|                                       |    | S <sub>1</sub> derived                                             |                                                                    |                                                                    | S <sub>2</sub> derived                                             |                                                                    |                                                                    | S <sub>3</sub> derived                                             |                                                                    |                                                                    | S <sub>2, S<sub>3</sub></sub> derived                              |
|---------------------------------------|----|--------------------------------------------------------------------|--------------------------------------------------------------------|--------------------------------------------------------------------|--------------------------------------------------------------------|--------------------------------------------------------------------|--------------------------------------------------------------------|--------------------------------------------------------------------|--------------------------------------------------------------------|--------------------------------------------------------------------|--------------------------------------------------------------------|
|                                       |    | ad                                                                 | dg                                                                 | gk                                                                 | be                                                                 | eh                                                                 | hj                                                                 | cf                                                                 | fi                                                                 | ij                                                                 | jk                                                                 |
| S <sub>1</sub> derived                | ad | S <sub>1</sub> x S <sub>2</sub><br>S <sub>1</sub> x S <sub>3</sub> | S <sub>1</sub> x S <sub>2</sub><br>S <sub>1</sub> x S <sub>3</sub> | S <sub>1</sub> x S <sub>2</sub><br>S <sub>1</sub> x S <sub>3</sub> | S <sub>1</sub> x S <sub>2</sub>                                    | S <sub>1</sub> x S <sub>2</sub>                                    | S <sub>1</sub> x S <sub>2</sub>                                    | S <sub>1</sub> x S <sub>3</sub>                                    | S <sub>1</sub> x S <sub>3</sub>                                    | S <sub>1</sub> x S <sub>3</sub>                                    | S <sub>1</sub> x S <sub>2</sub><br>S <sub>1</sub> x S <sub>3</sub> |
|                                       | dg | S <sub>1</sub> x S <sub>2</sub><br>S <sub>1</sub> x S <sub>3</sub> | S <sub>1</sub> x S <sub>2</sub><br>S <sub>1</sub> x S <sub>3</sub> | S <sub>1</sub> x S <sub>2</sub><br>S <sub>1</sub> x S <sub>3</sub> | S <sub>1</sub> x S <sub>2</sub>                                    | S <sub>1</sub> x S <sub>2</sub>                                    | S <sub>1</sub> x S <sub>2</sub>                                    | S <sub>1</sub> x S <sub>3</sub>                                    | S <sub>1</sub> x S <sub>3</sub>                                    | S <sub>1</sub> x S <sub>3</sub>                                    | S <sub>1</sub> x S <sub>2</sub><br>S <sub>1</sub> x S <sub>3</sub> |
| S <sub>2</sub> derived                | be | S <sub>1</sub> x S <sub>2</sub>                                    | S <sub>1</sub> x S <sub>2</sub>                                    | S <sub>1</sub> x S <sub>2</sub>                                    | S <sub>1</sub> x S <sub>2</sub><br>S <sub>2</sub> x S <sub>3</sub> | S <sub>1</sub> x S <sub>2</sub><br>S <sub>2</sub> x S <sub>3</sub> | S <sub>1</sub> x S <sub>2</sub><br>S <sub>2</sub> x S <sub>3</sub> | S <sub>2</sub> x S <sub>3</sub>                                    | S <sub>2</sub> x S <sub>3</sub>                                    | S <sub>2</sub> x S <sub>3</sub>                                    | S <sub>1</sub> x S <sub>2</sub>                                    |
|                                       | eg | S <sub>1</sub> x S <sub>2</sub>                                    | S <sub>1</sub> x S <sub>2</sub>                                    | S <sub>1</sub> x S <sub>2</sub>                                    | S <sub>1</sub> x S <sub>2</sub><br>S <sub>2</sub> x S <sub>3</sub> | S <sub>1</sub> x S <sub>2</sub><br>S <sub>2</sub> x S <sub>3</sub> | S <sub>1</sub> x S <sub>2</sub><br>S <sub>2</sub> x S <sub>3</sub> | S <sub>2</sub> x S <sub>3</sub>                                    | S <sub>2</sub> x S <sub>3</sub>                                    | S <sub>2</sub> x S <sub>3</sub>                                    | S <sub>1</sub> x S <sub>2</sub>                                    |
| S <sub>3</sub> derived                | cf | S <sub>1</sub> x S <sub>3</sub>                                    | S <sub>1</sub> x S <sub>3</sub>                                    | S <sub>1</sub> x S <sub>3</sub>                                    | S <sub>2</sub> x S <sub>3</sub>                                    | S <sub>2</sub> x S <sub>3</sub>                                    | S <sub>2</sub> x S <sub>3</sub>                                    | S <sub>1</sub> x S <sub>3</sub><br>S <sub>2</sub> x S <sub>3</sub> | S <sub>1</sub> x S <sub>3</sub><br>S <sub>2</sub> x S <sub>3</sub> | S <sub>1</sub> x S <sub>3</sub><br>S <sub>2</sub> x S <sub>3</sub> | S <sub>1</sub> x S <sub>3</sub>                                    |
|                                       | fi | S <sub>1</sub> x S <sub>3</sub>                                    | S <sub>1</sub> x S <sub>3</sub>                                    | S <sub>1</sub> x S <sub>3</sub>                                    | S <sub>2</sub> x S <sub>3</sub>                                    | S <sub>2</sub> x S <sub>3</sub>                                    | S <sub>2</sub> x S <sub>3</sub>                                    | S <sub>1</sub> x S <sub>3</sub><br>S <sub>2</sub> x S <sub>3</sub> | S <sub>1</sub> x S <sub>3</sub><br>S <sub>2</sub> x S <sub>3</sub> | S <sub>1</sub> x S <sub>3</sub><br>S <sub>2</sub> x S <sub>3</sub> | S <sub>1</sub> x S <sub>3</sub>                                    |
|                                       | ij | S <sub>1</sub> x S <sub>3</sub>                                    | S <sub>1</sub> x S <sub>3</sub>                                    | S <sub>1</sub> x S <sub>3</sub>                                    | S <sub>2</sub> x S <sub>3</sub>                                    | S <sub>2</sub> x S <sub>3</sub>                                    | S <sub>2</sub> x S <sub>3</sub>                                    | S <sub>1</sub> x S <sub>3</sub><br>S <sub>2</sub> x S <sub>3</sub> | S <sub>1</sub> x S <sub>3</sub><br>S <sub>2</sub> x S <sub>3</sub> | S <sub>1</sub> x S <sub>3</sub><br>S <sub>2</sub> x S <sub>3</sub> | S <sub>1</sub> x S <sub>3</sub><br><b>A<sub>1</sub> order</b>      |
| S <sub>1, S<sub>2</sub></sub> derived | gh | S <sub>1</sub> x S <sub>3</sub>                                    | S <sub>1</sub> x S <sub>3</sub><br><b>A<sub>2</sub> order</b>      | -                                                                  | S <sub>2</sub> x S <sub>3</sub>                                    | S <sub>2</sub> x S <sub>3</sub><br><b>A<sub>2</sub> order</b>      | -                                                                  | S <sub>1</sub> x S <sub>3</sub><br>S <sub>2</sub> x S <sub>3</sub> | S <sub>1</sub> x S <sub>3</sub><br>S <sub>2</sub> x S <sub>3</sub> | S <sub>1</sub> x S <sub>3</sub><br>S <sub>2</sub> x S <sub>3</sub> | -                                                                  |
|                                       | hj | S <sub>1</sub> x S <sub>3</sub>                                    | S <sub>1</sub> x S <sub>3</sub>                                    | S <sub>1</sub> x S <sub>3</sub><br><b>A<sub>3</sub> order</b>      | S <sub>2</sub> x S <sub>3</sub>                                    | S <sub>2</sub> x S <sub>3</sub>                                    | S <sub>2</sub> x S <sub>3</sub><br><b>A<sub>4</sub> order</b>      | S <sub>1</sub> x S <sub>3</sub><br>S <sub>2</sub> x S <sub>3</sub> | S <sub>1</sub> x S <sub>3</sub><br>S <sub>2</sub> x S <sub>3</sub> | S <sub>1</sub> x S <sub>3</sub><br>S <sub>2</sub> x S <sub>3</sub> | -                                                                  |

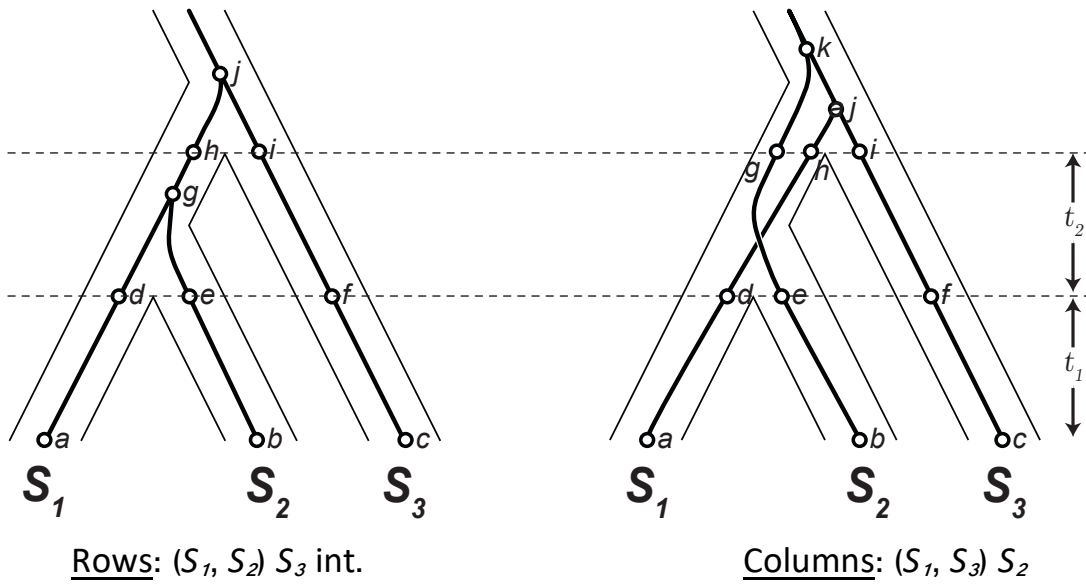

|                                       |    | S <sub>1</sub> derived                                             |                                                                    |                                                                            | S <sub>2</sub> derived                                             |                                                                    |                                                                    | S <sub>3</sub> derived                                             |                                                                    |                                                                    | S <sub>1, S<sub>3</sub></sub> derived                              |
|---------------------------------------|----|--------------------------------------------------------------------|--------------------------------------------------------------------|----------------------------------------------------------------------------|--------------------------------------------------------------------|--------------------------------------------------------------------|--------------------------------------------------------------------|--------------------------------------------------------------------|--------------------------------------------------------------------|--------------------------------------------------------------------|--------------------------------------------------------------------|
|                                       |    | ad                                                                 | dh                                                                 | hj                                                                         | be                                                                 | eg                                                                 | gk                                                                 | cf                                                                 | fi                                                                 | ij                                                                 | jk                                                                 |
| S <sub>1</sub> derived                | ad | S <sub>1</sub> x S <sub>2</sub><br>S <sub>1</sub> x S <sub>3</sub> | S <sub>1</sub> x S <sub>2</sub><br>S <sub>1</sub> x S <sub>3</sub> | S <sub>1</sub> x S <sub>2</sub><br>S <sub>1</sub> x S <sub>3</sub>         | S <sub>1</sub> x S <sub>2</sub>                                    | S <sub>1</sub> x S <sub>2</sub>                                    | S <sub>1</sub> x S <sub>2</sub>                                    | S <sub>1</sub> x S <sub>3</sub>                                    | S <sub>1</sub> x S <sub>3</sub>                                    | S <sub>1</sub> x S <sub>3</sub>                                    | S <sub>1</sub> x S <sub>2</sub>                                    |
|                                       | dg | S <sub>1</sub> x S <sub>2</sub><br>S <sub>1</sub> x S <sub>3</sub> | S <sub>1</sub> x S <sub>2</sub><br>S <sub>1</sub> x S <sub>3</sub> | S <sub>1</sub> x S <sub>2</sub><br>S <sub>1</sub> x S <sub>3</sub>         | S <sub>1</sub> x S <sub>2</sub>                                    | S <sub>1</sub> x S <sub>2</sub>                                    | S <sub>1</sub> x S <sub>2</sub>                                    | S <sub>1</sub> x S <sub>3</sub>                                    | S <sub>1</sub> x S <sub>3</sub>                                    | S <sub>1</sub> x S <sub>3</sub>                                    | S <sub>1</sub> x S <sub>2</sub>                                    |
| S <sub>2</sub> derived                | be | S <sub>1</sub> x S <sub>2</sub>                                    | S <sub>1</sub> x S <sub>2</sub>                                    | S <sub>1</sub> x S <sub>2</sub>                                            | S <sub>1</sub> x S <sub>2</sub><br>S <sub>2</sub> x S <sub>3</sub> | S <sub>1</sub> x S <sub>2</sub><br>S <sub>2</sub> x S <sub>3</sub> | S <sub>1</sub> x S <sub>2</sub><br>S <sub>2</sub> x S <sub>3</sub> | S <sub>2</sub> x S <sub>3</sub>                                    | S <sub>2</sub> x S <sub>3</sub>                                    | S <sub>2</sub> x S <sub>3</sub>                                    | S <sub>1</sub> x S <sub>2</sub><br>S <sub>2</sub> x S <sub>3</sub> |
|                                       | eg | S <sub>1</sub> x S <sub>2</sub>                                    | S <sub>1</sub> x S <sub>2</sub>                                    | S <sub>1</sub> x S <sub>2</sub>                                            | S <sub>1</sub> x S <sub>2</sub><br>S <sub>2</sub> x S <sub>3</sub> | S <sub>1</sub> x S <sub>2</sub><br>S <sub>2</sub> x S <sub>3</sub> | S <sub>1</sub> x S <sub>2</sub><br>S <sub>2</sub> x S <sub>3</sub> | S <sub>2</sub> x S <sub>3</sub>                                    | S <sub>2</sub> x S <sub>3</sub>                                    | S <sub>2</sub> x S <sub>3</sub>                                    | S <sub>1</sub> x S <sub>2</sub><br>S <sub>2</sub> x S <sub>3</sub> |
| S <sub>3</sub> derived                | cf | S <sub>1</sub> x S <sub>3</sub>                                    | S <sub>1</sub> x S <sub>3</sub>                                    | S <sub>1</sub> x S <sub>3</sub>                                            | S <sub>2</sub> x S <sub>3</sub>                                    | S <sub>2</sub> x S <sub>3</sub>                                    | S <sub>2</sub> x S <sub>3</sub>                                    | S <sub>1</sub> x S <sub>3</sub><br>S <sub>2</sub> x S <sub>3</sub> | S <sub>1</sub> x S <sub>3</sub><br>S <sub>2</sub> x S <sub>3</sub> | S <sub>1</sub> x S <sub>3</sub><br>S <sub>2</sub> x S <sub>3</sub> | S <sub>2</sub> x S <sub>3</sub>                                    |
|                                       | fi | S <sub>1</sub> x S <sub>3</sub>                                    | S <sub>1</sub> x S <sub>3</sub>                                    | S <sub>1</sub> x S <sub>3</sub>                                            | S <sub>2</sub> x S <sub>3</sub>                                    | S <sub>2</sub> x S <sub>3</sub>                                    | S <sub>2</sub> x S <sub>3</sub>                                    | S <sub>1</sub> x S <sub>3</sub><br>S <sub>2</sub> x S <sub>3</sub> | S <sub>1</sub> x S <sub>3</sub><br>S <sub>2</sub> x S <sub>3</sub> | S <sub>1</sub> x S <sub>3</sub><br>S <sub>2</sub> x S <sub>3</sub> | S <sub>2</sub> x S <sub>3</sub>                                    |
|                                       | ij | S <sub>1</sub> x S <sub>3</sub>                                    | S <sub>1</sub> x S <sub>3</sub>                                    | S <sub>1</sub> x S <sub>3</sub>                                            | S <sub>2</sub> x S <sub>3</sub>                                    | S <sub>2</sub> x S <sub>3</sub>                                    | S <sub>2</sub> x S <sub>3</sub>                                    | S <sub>1</sub> x S <sub>3</sub><br>S <sub>2</sub> x S <sub>3</sub> | S <sub>1</sub> x S <sub>3</sub><br>S <sub>2</sub> x S <sub>3</sub> | S <sub>1</sub> x S <sub>3</sub><br>S <sub>2</sub> x S <sub>3</sub> | S <sub>2</sub> x S <sub>3</sub><br><b>A<sub>1</sub> order</b>      |
| S <sub>1, S<sub>2</sub></sub> derived | gh | S <sub>1</sub> x S <sub>3</sub>                                    | S <sub>1</sub> x S <sub>3</sub><br><b>A<sub>2</sub> order</b>      | -                                                                          | S <sub>2</sub> x S <sub>3</sub>                                    | S <sub>2</sub> x S <sub>3</sub><br><b>A<sub>2</sub> order</b>      | -                                                                  | S <sub>1</sub> x S <sub>3</sub><br>S <sub>2</sub> x S <sub>3</sub> | S <sub>1</sub> x S <sub>3</sub><br>S <sub>2</sub> x S <sub>3</sub> | S <sub>1</sub> x S <sub>3</sub><br>S <sub>2</sub> x S <sub>3</sub> | -                                                                  |
|                                       | hj | S <sub>1</sub> x S <sub>3</sub>                                    | S <sub>1</sub> x S <sub>3</sub>                                    | S <sub>1</sub> x S <sub>3</sub> <sup>d</sup><br><b>A<sub>4</sub> order</b> | S <sub>2</sub> x S <sub>3</sub>                                    | S <sub>2</sub> x S <sub>3</sub>                                    | S <sub>2</sub> x S <sub>3</sub><br><b>A<sub>3</sub> order</b>      | S <sub>1</sub> x S <sub>3</sub><br>S <sub>2</sub> x S <sub>3</sub> | S <sub>1</sub> x S <sub>3</sub><br>S <sub>2</sub> x S <sub>3</sub> | S <sub>1</sub> x S <sub>3</sub><br>S <sub>2</sub> x S <sub>3</sub> | -                                                                  |

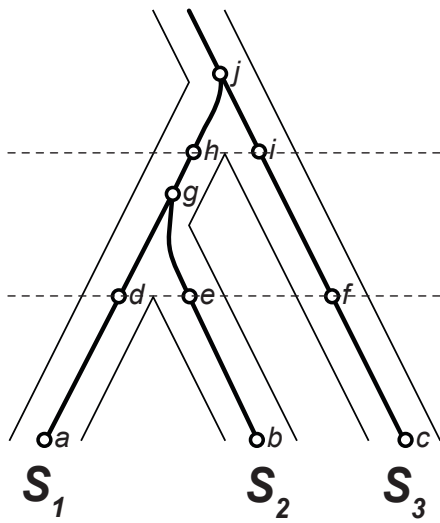

Rows:  $(S_1, S_2) S_3$  int.

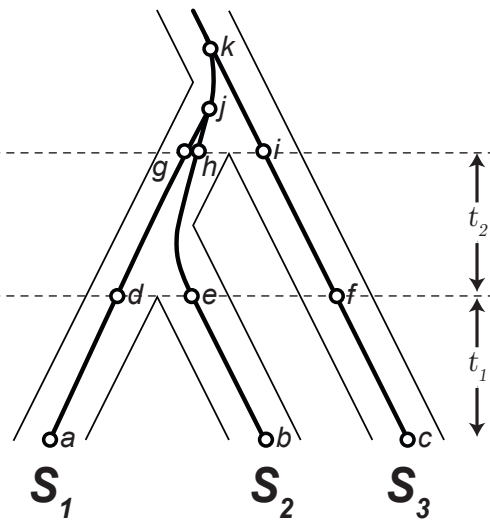

Columns:  $(S_1, S_2) S_3$  anc.

|                                       |    | S <sub>1</sub> derived                                             |                                                                    |                                                                    | S <sub>2</sub> derived                                             |                                                                    |                                                                    | S <sub>3</sub> derived                                             |                                                                    |                                                                    | S <sub>1, S<sub>2</sub></sub> derived                              |
|---------------------------------------|----|--------------------------------------------------------------------|--------------------------------------------------------------------|--------------------------------------------------------------------|--------------------------------------------------------------------|--------------------------------------------------------------------|--------------------------------------------------------------------|--------------------------------------------------------------------|--------------------------------------------------------------------|--------------------------------------------------------------------|--------------------------------------------------------------------|
|                                       |    | ad                                                                 | dg                                                                 | gj                                                                 | be                                                                 | eh                                                                 | hj                                                                 | cf                                                                 | fi                                                                 | ik                                                                 | jk                                                                 |
| S <sub>1</sub> derived                | ad | S <sub>1</sub> x S <sub>2</sub><br>S <sub>1</sub> x S <sub>3</sub> | S <sub>1</sub> x S <sub>2</sub><br>S <sub>1</sub> x S <sub>3</sub> | S <sub>1</sub> x S <sub>2</sub><br>S <sub>1</sub> x S <sub>3</sub> | S <sub>1</sub> x S <sub>2</sub>                                    | S <sub>1</sub> x S <sub>2</sub>                                    | S <sub>1</sub> x S <sub>2</sub>                                    | S <sub>1</sub> x S <sub>3</sub>                                    | S <sub>1</sub> x S <sub>3</sub>                                    | S <sub>1</sub> x S <sub>3</sub>                                    | S <sub>1</sub> x S <sub>3</sub>                                    |
|                                       | dg | S <sub>1</sub> x S <sub>2</sub><br>S <sub>1</sub> x S <sub>3</sub> | S <sub>1</sub> x S <sub>2</sub><br>S <sub>1</sub> x S <sub>3</sub> | S <sub>1</sub> x S <sub>2</sub><br>S <sub>1</sub> x S <sub>3</sub> | S <sub>1</sub> x S <sub>2</sub>                                    | S <sub>1</sub> x S <sub>2</sub>                                    | S <sub>1</sub> x S <sub>2</sub>                                    | S <sub>1</sub> x S <sub>3</sub>                                    | S <sub>1</sub> x S <sub>3</sub>                                    | S <sub>1</sub> x S <sub>3</sub>                                    | S <sub>1</sub> x S <sub>3</sub>                                    |
| S <sub>2</sub> derived                | be | S <sub>1</sub> x S <sub>2</sub>                                    | S <sub>1</sub> x S <sub>2</sub>                                    | S <sub>1</sub> x S <sub>2</sub>                                    | S <sub>1</sub> x S <sub>2</sub><br>S <sub>2</sub> x S <sub>3</sub> | S <sub>1</sub> x S <sub>2</sub><br>S <sub>2</sub> x S <sub>3</sub> | S <sub>1</sub> x S <sub>2</sub><br>S <sub>2</sub> x S <sub>3</sub> | S <sub>2</sub> x S <sub>3</sub>                                    | S <sub>2</sub> x S <sub>3</sub>                                    | S <sub>2</sub> x S <sub>3</sub>                                    | S <sub>2</sub> x S <sub>3</sub>                                    |
|                                       | eg | S <sub>1</sub> x S <sub>2</sub>                                    | S <sub>1</sub> x S <sub>2</sub>                                    | S <sub>1</sub> x S <sub>2</sub>                                    | S <sub>1</sub> x S <sub>2</sub><br>S <sub>2</sub> x S <sub>3</sub> | S <sub>1</sub> x S <sub>2</sub><br>S <sub>2</sub> x S <sub>3</sub> | S <sub>1</sub> x S <sub>2</sub><br>S <sub>2</sub> x S <sub>3</sub> | S <sub>2</sub> x S <sub>3</sub>                                    | S <sub>2</sub> x S <sub>3</sub>                                    | S <sub>2</sub> x S <sub>3</sub>                                    | S <sub>2</sub> x S <sub>3</sub>                                    |
| S <sub>3</sub> derived                | cf | S <sub>1</sub> x S <sub>3</sub>                                    | S <sub>1</sub> x S <sub>3</sub>                                    | S <sub>1</sub> x S <sub>3</sub>                                    | S <sub>2</sub> x S <sub>3</sub>                                    | S <sub>2</sub> x S <sub>3</sub>                                    | S <sub>2</sub> x S <sub>3</sub>                                    | S <sub>1</sub> x S <sub>3</sub><br>S <sub>2</sub> x S <sub>3</sub> | S <sub>1</sub> x S <sub>3</sub><br>S <sub>2</sub> x S <sub>3</sub> | S <sub>1</sub> x S <sub>3</sub><br>S <sub>2</sub> x S <sub>3</sub> | S <sub>1</sub> x S <sub>3</sub><br>S <sub>2</sub> x S <sub>3</sub> |
|                                       | fi | S <sub>1</sub> x S <sub>3</sub>                                    | S <sub>1</sub> x S <sub>3</sub>                                    | S <sub>1</sub> x S <sub>3</sub>                                    | S <sub>2</sub> x S <sub>3</sub>                                    | S <sub>2</sub> x S <sub>3</sub>                                    | S <sub>2</sub> x S <sub>3</sub>                                    | S <sub>1</sub> x S <sub>3</sub><br>S <sub>2</sub> x S <sub>3</sub> | S <sub>1</sub> x S <sub>3</sub><br>S <sub>2</sub> x S <sub>3</sub> | S <sub>1</sub> x S <sub>3</sub><br>S <sub>2</sub> x S <sub>3</sub> | S <sub>1</sub> x S <sub>3</sub><br>S <sub>2</sub> x S <sub>3</sub> |
|                                       | ij | S <sub>1</sub> x S <sub>3</sub>                                    | S <sub>1</sub> x S <sub>3</sub>                                    | S <sub>1</sub> x S <sub>3</sub>                                    | S <sub>2</sub> x S <sub>3</sub>                                    | S <sub>2</sub> x S <sub>3</sub>                                    | S <sub>2</sub> x S <sub>3</sub>                                    | S <sub>1</sub> x S <sub>3</sub><br>S <sub>2</sub> x S <sub>3</sub> | S <sub>1</sub> x S <sub>3</sub><br>S <sub>2</sub> x S <sub>3</sub> | S <sub>1</sub> x S <sub>3</sub><br>S <sub>2</sub> x S <sub>3</sub> | S <sub>1</sub> x S <sub>3</sub><br>S <sub>2</sub> x S <sub>3</sub> |
| S <sub>1, S<sub>2</sub></sub> derived | gh | S <sub>1</sub> x S <sub>3</sub>                                    | S <sub>1</sub> x S <sub>3</sub><br><b>A<sub>2</sub> order</b>      | -                                                                  | S <sub>2</sub> x S <sub>3</sub>                                    | S <sub>2</sub> x S <sub>3</sub><br><b>A<sub>2</sub> order</b>      | -                                                                  | S <sub>1</sub> x S <sub>3</sub><br>S <sub>2</sub> x S <sub>3</sub> | S <sub>1</sub> x S <sub>3</sub><br>S <sub>2</sub> x S <sub>3</sub> | S <sub>1</sub> x S <sub>3</sub><br>S <sub>2</sub> x S <sub>3</sub> | S <sub>1</sub> x S <sub>3</sub><br>S <sub>2</sub> x S <sub>3</sub> |
|                                       | hj | S <sub>1</sub> x S <sub>3</sub>                                    | S <sub>1</sub> x S <sub>3</sub>                                    | S <sub>1</sub> x S <sub>3</sub><br><b>A<sub>4</sub> order</b>      | S <sub>2</sub> x S <sub>3</sub>                                    | S <sub>2</sub> x S <sub>3</sub>                                    | S <sub>2</sub> x S <sub>3</sub><br><b>A<sub>4</sub> order</b>      | S <sub>1</sub> x S <sub>3</sub><br>S <sub>2</sub> x S <sub>3</sub> | S <sub>1</sub> x S <sub>3</sub><br>S <sub>2</sub> x S <sub>3</sub> | S <sub>1</sub> x S <sub>3</sub><br>S <sub>2</sub> x S <sub>3</sub> | S <sub>1</sub> x S <sub>3</sub><br>S <sub>2</sub> x S <sub>3</sub> |

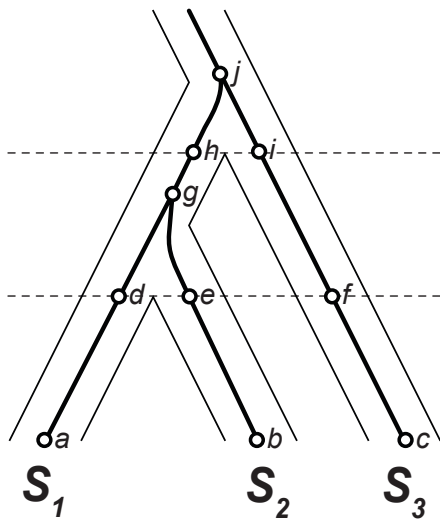

Rows: ( $S_1, S_2$ )  $S_3$  int.

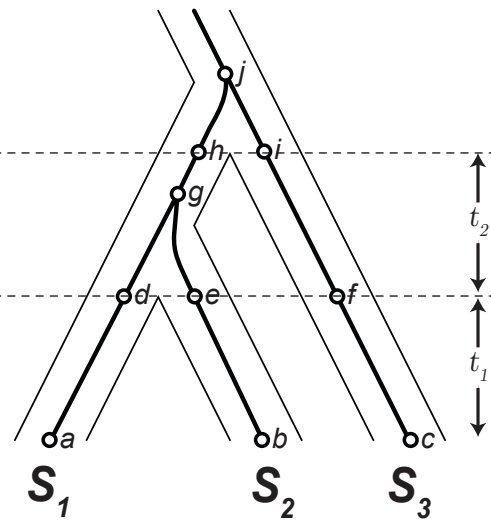

Columns: ( $S_1, S_2$ )  $S_3$  int.

|                                       |    | S <sub>1</sub> derived                                             |                                                                    | S <sub>2</sub> derived                                             |                                                                    | S <sub>3</sub> derived                                             |                                                                    |                                                                    | S <sub>1, S<sub>2</sub></sub> derived                              |                                                                    |
|---------------------------------------|----|--------------------------------------------------------------------|--------------------------------------------------------------------|--------------------------------------------------------------------|--------------------------------------------------------------------|--------------------------------------------------------------------|--------------------------------------------------------------------|--------------------------------------------------------------------|--------------------------------------------------------------------|--------------------------------------------------------------------|
|                                       |    | ad                                                                 | dg                                                                 | be                                                                 | eg                                                                 | cf                                                                 | fi                                                                 | ij                                                                 | gh                                                                 | hj                                                                 |
| S <sub>1</sub> derived                | ad | S <sub>1</sub> x S <sub>2</sub><br>S <sub>1</sub> x S <sub>3</sub> | S <sub>1</sub> x S <sub>2</sub><br>S <sub>1</sub> x S <sub>3</sub> | S <sub>1</sub> x S <sub>2</sub>                                    | S <sub>1</sub> x S <sub>2</sub>                                    | S <sub>1</sub> x S <sub>3</sub>                                    | S <sub>1</sub> x S <sub>3</sub>                                    | S <sub>1</sub> x S <sub>3</sub>                                    | S <sub>1</sub> x S <sub>3</sub>                                    | S <sub>1</sub> x S <sub>3</sub>                                    |
|                                       | dg | S <sub>1</sub> x S <sub>2</sub><br>S <sub>1</sub> x S <sub>3</sub> | S <sub>1</sub> x S <sub>2</sub><br>S <sub>1</sub> x S <sub>3</sub> | S <sub>1</sub> x S <sub>2</sub>                                    | S <sub>1</sub> x S <sub>2</sub>                                    | S <sub>1</sub> x S <sub>3</sub>                                    | S <sub>1</sub> x S <sub>3</sub>                                    | S <sub>1</sub> x S <sub>3</sub>                                    | S <sub>1</sub> x S <sub>3</sub><br><b>A<sub>5</sub> order</b>      | S <sub>1</sub> x S <sub>3</sub>                                    |
| S <sub>2</sub> derived                | be | S <sub>1</sub> x S <sub>2</sub>                                    | S <sub>1</sub> x S <sub>2</sub>                                    | S <sub>1</sub> x S <sub>2</sub><br>S <sub>2</sub> x S <sub>3</sub> | S <sub>1</sub> x S <sub>2</sub><br>S <sub>2</sub> x S <sub>3</sub> | S <sub>2</sub> x S <sub>3</sub>                                    | S <sub>2</sub> x S <sub>3</sub>                                    | S <sub>2</sub> x S <sub>3</sub>                                    | S <sub>2</sub> x S <sub>3</sub>                                    | S <sub>2</sub> x S <sub>3</sub>                                    |
|                                       | eg | S <sub>1</sub> x S <sub>2</sub>                                    | S <sub>1</sub> x S <sub>2</sub>                                    | S <sub>1</sub> x S <sub>2</sub><br>S <sub>2</sub> x S <sub>3</sub> | S <sub>1</sub> x S <sub>2</sub><br>S <sub>2</sub> x S <sub>3</sub> | S <sub>2</sub> x S <sub>3</sub>                                    | S <sub>2</sub> x S <sub>3</sub>                                    | S <sub>2</sub> x S <sub>3</sub>                                    | S <sub>2</sub> x S <sub>3</sub><br><b>A<sub>5</sub> order</b>      | S <sub>2</sub> x S <sub>3</sub>                                    |
| S <sub>3</sub> derived                | cf | S <sub>1</sub> x S <sub>3</sub>                                    | S <sub>1</sub> x S <sub>3</sub>                                    | S <sub>2</sub> x S <sub>3</sub>                                    | S <sub>2</sub> x S <sub>3</sub>                                    | S <sub>1</sub> x S <sub>3</sub><br>S <sub>2</sub> x S <sub>3</sub> | S <sub>1</sub> x S <sub>3</sub><br>S <sub>2</sub> x S <sub>3</sub> | S <sub>1</sub> x S <sub>3</sub><br>S <sub>2</sub> x S <sub>3</sub> | S <sub>1</sub> x S <sub>3</sub><br>S <sub>2</sub> x S <sub>3</sub> | S <sub>1</sub> x S <sub>3</sub><br>S <sub>2</sub> x S <sub>3</sub> |
|                                       | fi | S <sub>1</sub> x S <sub>3</sub>                                    | S <sub>1</sub> x S <sub>3</sub>                                    | S <sub>2</sub> x S <sub>3</sub>                                    | S <sub>2</sub> x S <sub>3</sub>                                    | S <sub>1</sub> x S <sub>3</sub><br>S <sub>2</sub> x S <sub>3</sub> | S <sub>1</sub> x S <sub>3</sub><br>S <sub>2</sub> x S <sub>3</sub> | S <sub>1</sub> x S <sub>3</sub><br>S <sub>2</sub> x S <sub>3</sub> | S <sub>1</sub> x S <sub>3</sub><br>S <sub>2</sub> x S <sub>3</sub> | S <sub>1</sub> x S <sub>3</sub><br>S <sub>2</sub> x S <sub>3</sub> |
|                                       | ij | S <sub>1</sub> x S <sub>3</sub>                                    | S <sub>1</sub> x S <sub>3</sub>                                    | S <sub>2</sub> x S <sub>3</sub>                                    | S <sub>2</sub> x S <sub>3</sub>                                    | S <sub>1</sub> x S <sub>3</sub><br>S <sub>2</sub> x S <sub>3</sub> | S <sub>1</sub> x S <sub>3</sub><br>S <sub>2</sub> x S <sub>3</sub> | S <sub>1</sub> x S <sub>3</sub><br>S <sub>2</sub> x S <sub>3</sub> | S <sub>1</sub> x S <sub>3</sub><br>S <sub>2</sub> x S <sub>3</sub> | S <sub>1</sub> x S <sub>3</sub><br>S <sub>2</sub> x S <sub>3</sub> |
| S <sub>1, S<sub>2</sub></sub> derived | gh | S <sub>1</sub> x S <sub>3</sub>                                    | S <sub>1</sub> x S <sub>3</sub><br><b>A<sub>5</sub> order</b>      | S <sub>2</sub> x S <sub>3</sub>                                    | S <sub>2</sub> x S <sub>3</sub><br><b>A<sub>5</sub> order</b>      | S <sub>1</sub> x S <sub>3</sub><br>S <sub>2</sub> x S <sub>3</sub> | S <sub>1</sub> x S <sub>3</sub><br>S <sub>2</sub> x S <sub>3</sub> | S <sub>1</sub> x S <sub>3</sub><br>S <sub>2</sub> x S <sub>3</sub> | S <sub>1</sub> x S <sub>3</sub><br>S <sub>2</sub> x S <sub>3</sub> | S <sub>1</sub> x S <sub>3</sub><br>S <sub>2</sub> x S <sub>3</sub> |
|                                       | hj | S <sub>1</sub> x S <sub>3</sub>                                    | S <sub>1</sub> x S <sub>3</sub>                                    | S <sub>2</sub> x S <sub>3</sub>                                    | S <sub>2</sub> x S <sub>3</sub>                                    | S <sub>1</sub> x S <sub>3</sub><br>S <sub>2</sub> x S <sub>3</sub> | S <sub>1</sub> x S <sub>3</sub><br>S <sub>2</sub> x S <sub>3</sub> | S <sub>1</sub> x S <sub>3</sub><br>S <sub>2</sub> x S <sub>3</sub> | S <sub>1</sub> x S <sub>3</sub><br>S <sub>2</sub> x S <sub>3</sub> | S <sub>1</sub> x S <sub>3</sub><br>S <sub>2</sub> x S <sub>3</sub> |

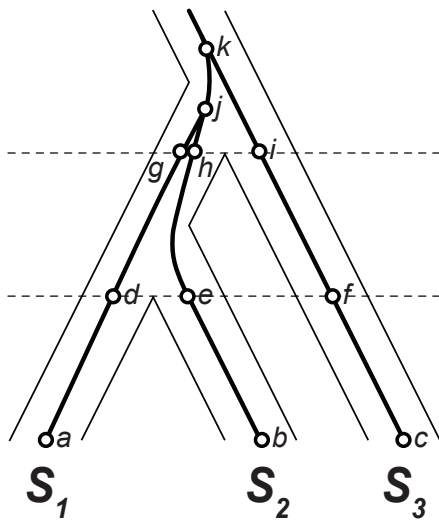

Rows:  $(S_1, S_2) S_3$  anc.

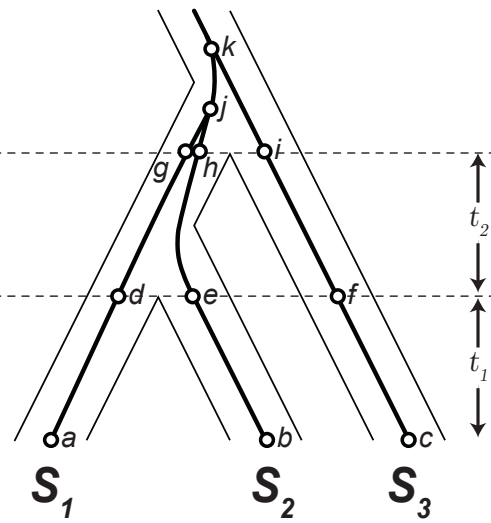

Columns:  $(S_1, S_2) S_3$  anc.

|                                       |    | S <sub>1</sub> derived                                             |                                                                    |                                                                    | S <sub>2</sub> derived                                             |                                                                    |                                                                    | S <sub>3</sub> derived                                             |                                                                    |                                                                    | S <sub>1, S<sub>2</sub></sub> derived                              |
|---------------------------------------|----|--------------------------------------------------------------------|--------------------------------------------------------------------|--------------------------------------------------------------------|--------------------------------------------------------------------|--------------------------------------------------------------------|--------------------------------------------------------------------|--------------------------------------------------------------------|--------------------------------------------------------------------|--------------------------------------------------------------------|--------------------------------------------------------------------|
|                                       |    | ad                                                                 | dg                                                                 | gj                                                                 | be                                                                 | eh                                                                 | hj                                                                 | cf                                                                 | fi                                                                 | ik                                                                 | jk                                                                 |
| S <sub>1</sub> derived                | ad | S <sub>1</sub> x S <sub>2</sub><br>S <sub>1</sub> x S <sub>3</sub> | S <sub>1</sub> x S <sub>2</sub><br>S <sub>1</sub> x S <sub>3</sub> | S <sub>1</sub> x S <sub>2</sub><br>S <sub>1</sub> x S <sub>3</sub> | S <sub>1</sub> x S <sub>2</sub>                                    | S <sub>1</sub> x S <sub>2</sub>                                    | S <sub>1</sub> x S <sub>2</sub>                                    | S <sub>1</sub> x S <sub>3</sub>                                    | S <sub>1</sub> x S <sub>3</sub>                                    | S <sub>1</sub> x S <sub>3</sub>                                    | S <sub>1</sub> x S <sub>3</sub>                                    |
|                                       | dg | S <sub>1</sub> x S <sub>2</sub><br>S <sub>1</sub> x S <sub>3</sub> | S <sub>1</sub> x S <sub>2</sub><br>S <sub>1</sub> x S <sub>3</sub> | S <sub>1</sub> x S <sub>2</sub><br>S <sub>1</sub> x S <sub>3</sub> | S <sub>1</sub> x S <sub>2</sub>                                    | S <sub>1</sub> x S <sub>2</sub>                                    | S <sub>1</sub> x S <sub>2</sub>                                    | S <sub>1</sub> x S <sub>3</sub>                                    | S <sub>1</sub> x S <sub>3</sub>                                    | S <sub>1</sub> x S <sub>3</sub>                                    | S <sub>1</sub> x S <sub>3</sub>                                    |
|                                       | gj | S <sub>1</sub> x S <sub>2</sub><br>S <sub>1</sub> x S <sub>3</sub> | S <sub>1</sub> x S <sub>2</sub><br>S <sub>1</sub> x S <sub>3</sub> | S <sub>1</sub> x S <sub>2</sub><br>S <sub>1</sub> x S <sub>3</sub> | S <sub>1</sub> x S <sub>2</sub>                                    | S <sub>1</sub> x S <sub>2</sub>                                    | S <sub>1</sub> x S <sub>2</sub>                                    | S <sub>1</sub> x S <sub>3</sub>                                    | S <sub>1</sub> x S <sub>3</sub>                                    | S <sub>1</sub> x S <sub>3</sub>                                    | S <sub>1</sub> x S <sub>3</sub><br><b>A<sub>6</sub> order</b>      |
| S <sub>2</sub> derived                | be | S <sub>1</sub> x S <sub>2</sub>                                    | S <sub>1</sub> x S <sub>2</sub>                                    | S <sub>1</sub> x S <sub>2</sub>                                    | S <sub>1</sub> x S <sub>2</sub><br>S <sub>2</sub> x S <sub>3</sub> | S <sub>1</sub> x S <sub>2</sub><br>S <sub>2</sub> x S <sub>3</sub> | S <sub>1</sub> x S <sub>2</sub><br>S <sub>2</sub> x S <sub>3</sub> | S <sub>2</sub> x S <sub>3</sub>                                    | S <sub>2</sub> x S <sub>3</sub>                                    | S <sub>2</sub> x S <sub>3</sub>                                    | S <sub>2</sub> x S <sub>3</sub>                                    |
|                                       | eh | S <sub>1</sub> x S <sub>2</sub>                                    | S <sub>1</sub> x S <sub>2</sub>                                    | S <sub>1</sub> x S <sub>2</sub>                                    | S <sub>1</sub> x S <sub>2</sub><br>S <sub>2</sub> x S <sub>3</sub> | S <sub>1</sub> x S <sub>2</sub><br>S <sub>2</sub> x S <sub>3</sub> | S <sub>1</sub> x S <sub>2</sub><br>S <sub>2</sub> x S <sub>3</sub> | S <sub>2</sub> x S <sub>3</sub>                                    | S <sub>2</sub> x S <sub>3</sub>                                    | S <sub>2</sub> x S <sub>3</sub>                                    | S <sub>2</sub> x S <sub>3</sub>                                    |
|                                       | hj | S <sub>1</sub> x S <sub>2</sub>                                    | S <sub>1</sub> x S <sub>2</sub>                                    | S <sub>1</sub> x S <sub>2</sub>                                    | S <sub>1</sub> x S <sub>2</sub><br>S <sub>2</sub> x S <sub>3</sub> | S <sub>1</sub> x S <sub>2</sub><br>S <sub>2</sub> x S <sub>3</sub> | S <sub>1</sub> x S <sub>2</sub><br>S <sub>2</sub> x S <sub>3</sub> | S <sub>2</sub> x S <sub>3</sub>                                    | S <sub>2</sub> x S <sub>3</sub>                                    | S <sub>2</sub> x S <sub>3</sub>                                    | S <sub>2</sub> x S <sub>3</sub><br><b>A<sub>6</sub> order</b>      |
| S <sub>3</sub> derived                | cf | S <sub>1</sub> x S <sub>3</sub>                                    | S <sub>1</sub> x S <sub>3</sub>                                    | S <sub>1</sub> x S <sub>3</sub>                                    | S <sub>2</sub> x S <sub>3</sub>                                    | S <sub>2</sub> x S <sub>3</sub>                                    | S <sub>2</sub> x S <sub>3</sub>                                    | S <sub>1</sub> x S <sub>3</sub><br>S <sub>2</sub> x S <sub>3</sub> | S <sub>1</sub> x S <sub>3</sub><br>S <sub>2</sub> x S <sub>3</sub> | S <sub>1</sub> x S <sub>3</sub><br>S <sub>2</sub> x S <sub>3</sub> | S <sub>1</sub> x S <sub>3</sub><br>S <sub>2</sub> x S <sub>3</sub> |
|                                       | fi | S <sub>1</sub> x S <sub>3</sub>                                    | S <sub>1</sub> x S <sub>3</sub>                                    | S <sub>1</sub> x S <sub>3</sub>                                    | S <sub>2</sub> x S <sub>3</sub>                                    | S <sub>2</sub> x S <sub>3</sub>                                    | S <sub>2</sub> x S <sub>3</sub>                                    | S <sub>1</sub> x S <sub>3</sub><br>S <sub>2</sub> x S <sub>3</sub> | S <sub>1</sub> x S <sub>3</sub><br>S <sub>2</sub> x S <sub>3</sub> | S <sub>1</sub> x S <sub>3</sub><br>S <sub>2</sub> x S <sub>3</sub> | S <sub>1</sub> x S <sub>3</sub><br>S <sub>2</sub> x S <sub>3</sub> |
|                                       | ik | S <sub>1</sub> x S <sub>3</sub>                                    | S <sub>1</sub> x S <sub>3</sub>                                    | S <sub>1</sub> x S <sub>3</sub>                                    | S <sub>2</sub> x S <sub>3</sub>                                    | S <sub>2</sub> x S <sub>3</sub>                                    | S <sub>2</sub> x S <sub>3</sub>                                    | S <sub>1</sub> x S <sub>3</sub><br>S <sub>2</sub> x S <sub>3</sub> | S <sub>1</sub> x S <sub>3</sub><br>S <sub>2</sub> x S <sub>3</sub> | S <sub>1</sub> x S <sub>3</sub><br>S <sub>2</sub> x S <sub>3</sub> | S <sub>1</sub> x S <sub>3</sub><br>S <sub>2</sub> x S <sub>3</sub> |
| S <sub>1, S<sub>2</sub></sub> derived | jk | S <sub>1</sub> x S <sub>3</sub>                                    | S <sub>1</sub> x S <sub>3</sub>                                    | S <sub>1</sub> x S <sub>3</sub><br><b>A<sub>6</sub> order</b>      | S <sub>2</sub> x S <sub>3</sub>                                    | S <sub>2</sub> x S <sub>3</sub>                                    | S <sub>2</sub> x S <sub>3</sub><br><b>A<sub>6</sub> order</b>      | S <sub>1</sub> x S <sub>3</sub><br>S <sub>2</sub> x S <sub>3</sub> | S <sub>1</sub> x S <sub>3</sub><br>S <sub>2</sub> x S <sub>3</sub> | S <sub>1</sub> x S <sub>3</sub><br>S <sub>2</sub> x S <sub>3</sub> | S <sub>1</sub> x S <sub>3</sub><br>S <sub>2</sub> x S <sub>3</sub> |

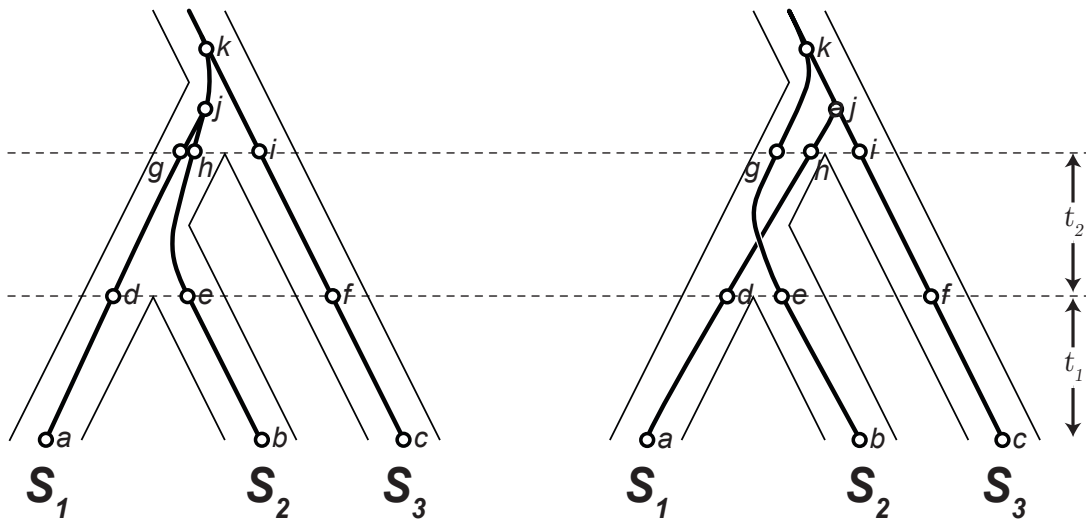

Rows: ( $S_1, S_2$ )  $S_3$  anc.

Columns: ( $S_1, S_3$ )  $S_2$

|                                       |    | S <sub>1</sub> derived                                             |                                                                    |                                                                    | S <sub>2</sub> derived                                             |                                                                    |                                                                    | S <sub>3</sub> derived                                             |                                                                    |                                                                    | S <sub>1, S<sub>3</sub></sub> derived                              |
|---------------------------------------|----|--------------------------------------------------------------------|--------------------------------------------------------------------|--------------------------------------------------------------------|--------------------------------------------------------------------|--------------------------------------------------------------------|--------------------------------------------------------------------|--------------------------------------------------------------------|--------------------------------------------------------------------|--------------------------------------------------------------------|--------------------------------------------------------------------|
|                                       |    | ad                                                                 | dh                                                                 | hj                                                                 | be                                                                 | eg                                                                 | gk                                                                 | cf                                                                 | fi                                                                 | ij                                                                 | jk                                                                 |
| S <sub>1</sub> derived                | ad | S <sub>1</sub> x S <sub>2</sub><br>S <sub>1</sub> x S <sub>3</sub> | S <sub>1</sub> x S <sub>2</sub><br>S <sub>1</sub> x S <sub>3</sub> | S <sub>1</sub> x S <sub>2</sub><br>S <sub>1</sub> x S <sub>3</sub> | S <sub>1</sub> x S <sub>2</sub>                                    | S <sub>1</sub> x S <sub>2</sub>                                    | S <sub>1</sub> x S <sub>2</sub>                                    | S <sub>1</sub> x S <sub>3</sub>                                    | S <sub>1</sub> x S <sub>3</sub>                                    | S <sub>1</sub> x S <sub>3</sub>                                    | S <sub>1</sub> x S <sub>2</sub>                                    |
|                                       | dg | S <sub>1</sub> x S <sub>2</sub><br>S <sub>1</sub> x S <sub>3</sub> | S <sub>1</sub> x S <sub>2</sub><br>S <sub>1</sub> x S <sub>3</sub> | S <sub>1</sub> x S <sub>2</sub><br>S <sub>1</sub> x S <sub>3</sub> | S <sub>1</sub> x S <sub>2</sub>                                    | S <sub>1</sub> x S <sub>2</sub>                                    | S <sub>1</sub> x S <sub>2</sub>                                    | S <sub>1</sub> x S <sub>3</sub>                                    | S <sub>1</sub> x S <sub>3</sub>                                    | S <sub>1</sub> x S <sub>3</sub>                                    | S <sub>1</sub> x S <sub>2</sub>                                    |
|                                       | gj | S <sub>1</sub> x S <sub>2</sub><br>S <sub>1</sub> x S <sub>3</sub> | S <sub>1</sub> x S <sub>2</sub><br>S <sub>1</sub> x S <sub>3</sub> | S <sub>1</sub> x S <sub>2</sub><br>S <sub>1</sub> x S <sub>3</sub> | S <sub>1</sub> x S <sub>2</sub>                                    | S <sub>1</sub> x S <sub>2</sub>                                    | S <sub>1</sub> x S <sub>2</sub>                                    | S <sub>1</sub> x S <sub>3</sub>                                    | S <sub>1</sub> x S <sub>3</sub>                                    | S <sub>1</sub> x S <sub>3</sub>                                    | S <sub>1</sub> x S <sub>2</sub><br><b>A<sub>6</sub> order</b>      |
| S <sub>2</sub> derived                | be | S <sub>1</sub> x S <sub>2</sub>                                    | S <sub>1</sub> x S <sub>2</sub>                                    | S <sub>1</sub> x S <sub>2</sub>                                    | S <sub>1</sub> x S <sub>2</sub><br>S <sub>2</sub> x S <sub>3</sub> | S <sub>1</sub> x S <sub>2</sub><br>S <sub>2</sub> x S <sub>3</sub> | S <sub>1</sub> x S <sub>2</sub><br>S <sub>2</sub> x S <sub>3</sub> | S <sub>2</sub> x S <sub>3</sub>                                    | S <sub>2</sub> x S <sub>3</sub>                                    | S <sub>2</sub> x S <sub>3</sub>                                    | S <sub>1</sub> x S <sub>2</sub><br>S <sub>2</sub> x S <sub>3</sub> |
|                                       | eh | S <sub>1</sub> x S <sub>2</sub>                                    | S <sub>1</sub> x S <sub>2</sub>                                    | S <sub>1</sub> x S <sub>2</sub>                                    | S <sub>1</sub> x S <sub>2</sub><br>S <sub>2</sub> x S <sub>3</sub> | S <sub>1</sub> x S <sub>2</sub><br>S <sub>2</sub> x S <sub>3</sub> | S <sub>1</sub> x S <sub>2</sub><br>S <sub>2</sub> x S <sub>3</sub> | S <sub>2</sub> x S <sub>3</sub>                                    | S <sub>2</sub> x S <sub>3</sub>                                    | S <sub>2</sub> x S <sub>3</sub>                                    | S <sub>1</sub> x S <sub>2</sub><br>S <sub>2</sub> x S <sub>3</sub> |
|                                       | hj | S <sub>1</sub> x S <sub>2</sub>                                    | S <sub>1</sub> x S <sub>2</sub>                                    | S <sub>1</sub> x S <sub>2</sub>                                    | S <sub>1</sub> x S <sub>2</sub><br>S <sub>2</sub> x S <sub>3</sub> | S <sub>1</sub> x S <sub>2</sub><br>S <sub>2</sub> x S <sub>3</sub> | S <sub>1</sub> x S <sub>2</sub><br>S <sub>2</sub> x S <sub>3</sub> | S <sub>2</sub> x S <sub>3</sub>                                    | S <sub>2</sub> x S <sub>3</sub>                                    | S <sub>2</sub> x S <sub>3</sub>                                    | S <sub>1</sub> x S <sub>2</sub><br>S <sub>2</sub> x S <sub>3</sub> |
| S <sub>3</sub> derived                | cf | S <sub>1</sub> x S <sub>3</sub>                                    | S <sub>1</sub> x S <sub>3</sub>                                    | S <sub>1</sub> x S <sub>3</sub>                                    | S <sub>2</sub> x S <sub>3</sub>                                    | S <sub>2</sub> x S <sub>3</sub>                                    | S <sub>2</sub> x S <sub>3</sub>                                    | S <sub>1</sub> x S <sub>3</sub><br>S <sub>2</sub> x S <sub>3</sub> | S <sub>1</sub> x S <sub>3</sub><br>S <sub>2</sub> x S <sub>3</sub> | S <sub>1</sub> x S <sub>3</sub><br>S <sub>2</sub> x S <sub>3</sub> | S <sub>2</sub> x S <sub>3</sub>                                    |
|                                       | fi | S <sub>1</sub> x S <sub>3</sub>                                    | S <sub>1</sub> x S <sub>3</sub>                                    | S <sub>1</sub> x S <sub>3</sub>                                    | S <sub>2</sub> x S <sub>3</sub>                                    | S <sub>2</sub> x S <sub>3</sub>                                    | S <sub>2</sub> x S <sub>3</sub>                                    | S <sub>1</sub> x S <sub>3</sub><br>S <sub>2</sub> x S <sub>3</sub> | S <sub>1</sub> x S <sub>3</sub><br>S <sub>2</sub> x S <sub>3</sub> | S <sub>1</sub> x S <sub>3</sub><br>S <sub>2</sub> x S <sub>3</sub> | S <sub>2</sub> x S <sub>3</sub>                                    |
|                                       | ik | S <sub>1</sub> x S <sub>3</sub>                                    | S <sub>1</sub> x S <sub>3</sub>                                    | S <sub>1</sub> x S <sub>3</sub>                                    | S <sub>2</sub> x S <sub>3</sub>                                    | S <sub>2</sub> x S <sub>3</sub>                                    | S <sub>2</sub> x S <sub>3</sub>                                    | S <sub>1</sub> x S <sub>3</sub><br>S <sub>2</sub> x S <sub>3</sub> | S <sub>1</sub> x S <sub>3</sub><br>S <sub>2</sub> x S <sub>3</sub> | S <sub>1</sub> x S <sub>3</sub><br>S <sub>2</sub> x S <sub>3</sub> | S <sub>2</sub> x S <sub>3</sub><br><b>A<sub>7</sub> order</b>      |
| S <sub>1, S<sub>2</sub></sub> derived | jk | S <sub>1</sub> x S <sub>3</sub>                                    | S <sub>1</sub> x S <sub>3</sub>                                    | S <sub>1</sub> x S <sub>3</sub><br><b>A<sub>6</sub> order</b>      | S <sub>2</sub> x S <sub>3</sub>                                    | S <sub>2</sub> x S <sub>3</sub>                                    | S <sub>2</sub> x S <sub>3</sub><br><b>A<sub>7</sub> order</b>      | S <sub>1</sub> x S <sub>3</sub><br>S <sub>2</sub> x S <sub>3</sub> | S <sub>1</sub> x S <sub>3</sub><br>S <sub>2</sub> x S <sub>3</sub> | S <sub>1</sub> x S <sub>3</sub><br>S <sub>2</sub> x S <sub>3</sub> | -                                                                  |

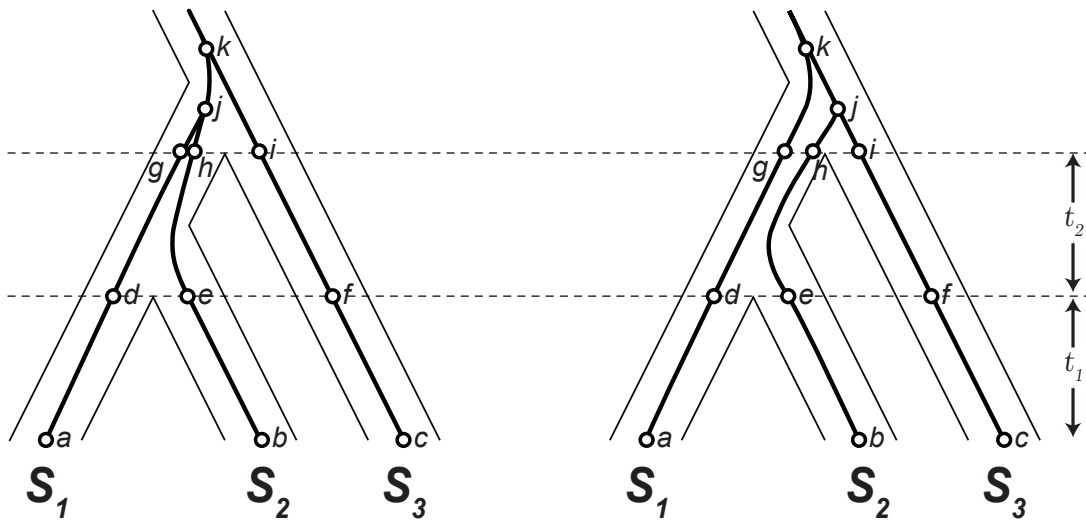

Rows: ( $S_1, S_2$ )  $S_3$  anc.

Columns: ( $S_2, S_3$ )  $S_1$

|                                       |    | S <sub>1</sub> derived                                             |                                                                    |                                                                    | S <sub>2</sub> derived                                             |                                                                    |                                                                    | S <sub>3</sub> derived                                             |                                                                    |                                                                    | S <sub>2, S<sub>3</sub></sub> derived                              |
|---------------------------------------|----|--------------------------------------------------------------------|--------------------------------------------------------------------|--------------------------------------------------------------------|--------------------------------------------------------------------|--------------------------------------------------------------------|--------------------------------------------------------------------|--------------------------------------------------------------------|--------------------------------------------------------------------|--------------------------------------------------------------------|--------------------------------------------------------------------|
|                                       |    | ad                                                                 | dg                                                                 | gk                                                                 | be                                                                 | eh                                                                 | hj                                                                 | cf                                                                 | fi                                                                 | ij                                                                 | jk                                                                 |
| S <sub>1</sub> derived                | ad | S <sub>1</sub> x S <sub>2</sub><br>S <sub>1</sub> x S <sub>3</sub> | S <sub>1</sub> x S <sub>2</sub><br>S <sub>1</sub> x S <sub>3</sub> | S <sub>1</sub> x S <sub>2</sub><br>S <sub>1</sub> x S <sub>3</sub> | S <sub>1</sub> x S <sub>2</sub>                                    | S <sub>1</sub> x S <sub>2</sub>                                    | S <sub>1</sub> x S <sub>2</sub>                                    | S <sub>1</sub> x S <sub>3</sub>                                    | S <sub>1</sub> x S <sub>3</sub>                                    | S <sub>1</sub> x S <sub>3</sub>                                    | S <sub>1</sub> x S <sub>2</sub><br>S <sub>1</sub> x S <sub>3</sub> |
|                                       | dg | S <sub>1</sub> x S <sub>2</sub><br>S <sub>1</sub> x S <sub>3</sub> | S <sub>1</sub> x S <sub>2</sub><br>S <sub>1</sub> x S <sub>3</sub> | S <sub>1</sub> x S <sub>2</sub><br>S <sub>1</sub> x S <sub>3</sub> | S <sub>1</sub> x S <sub>2</sub>                                    | S <sub>1</sub> x S <sub>2</sub>                                    | S <sub>1</sub> x S <sub>2</sub>                                    | S <sub>1</sub> x S <sub>3</sub>                                    | S <sub>1</sub> x S <sub>3</sub>                                    | S <sub>1</sub> x S <sub>3</sub>                                    | S <sub>1</sub> x S <sub>2</sub><br>S <sub>1</sub> x S <sub>3</sub> |
|                                       | gj | S <sub>1</sub> x S <sub>2</sub><br>S <sub>1</sub> x S <sub>3</sub> | S <sub>1</sub> x S <sub>2</sub><br>S <sub>1</sub> x S <sub>3</sub> | S <sub>1</sub> x S <sub>2</sub><br>S <sub>1</sub> x S <sub>3</sub> | S <sub>1</sub> x S <sub>2</sub>                                    | S <sub>1</sub> x S <sub>2</sub>                                    | S <sub>1</sub> x S <sub>2</sub>                                    | S <sub>1</sub> x S <sub>3</sub>                                    | S <sub>1</sub> x S <sub>3</sub>                                    | S <sub>1</sub> x S <sub>3</sub>                                    | S <sub>1</sub> x S <sub>2</sub><br>S <sub>1</sub> x S <sub>3</sub> |
| S <sub>2</sub> derived                | be | S <sub>1</sub> x S <sub>2</sub>                                    | S <sub>1</sub> x S <sub>2</sub>                                    | S <sub>1</sub> x S <sub>2</sub>                                    | S <sub>1</sub> x S <sub>2</sub><br>S <sub>2</sub> x S <sub>3</sub> | S <sub>1</sub> x S <sub>2</sub><br>S <sub>2</sub> x S <sub>3</sub> | S <sub>1</sub> x S <sub>2</sub><br>S <sub>2</sub> x S <sub>3</sub> | S <sub>2</sub> x S <sub>3</sub>                                    | S <sub>2</sub> x S <sub>3</sub>                                    | S <sub>2</sub> x S <sub>3</sub>                                    | S <sub>1</sub> x S <sub>2</sub>                                    |
|                                       | eh | S <sub>1</sub> x S <sub>2</sub>                                    | S <sub>1</sub> x S <sub>2</sub>                                    | S <sub>1</sub> x S <sub>2</sub>                                    | S <sub>1</sub> x S <sub>2</sub><br>S <sub>2</sub> x S <sub>3</sub> | S <sub>1</sub> x S <sub>2</sub><br>S <sub>2</sub> x S <sub>3</sub> | S <sub>1</sub> x S <sub>2</sub><br>S <sub>2</sub> x S <sub>3</sub> | S <sub>2</sub> x S <sub>3</sub>                                    | S <sub>2</sub> x S <sub>3</sub>                                    | S <sub>2</sub> x S <sub>3</sub>                                    | S <sub>1</sub> x S <sub>2</sub>                                    |
|                                       | hj | S <sub>1</sub> x S <sub>2</sub>                                    | S <sub>1</sub> x S <sub>2</sub>                                    | S <sub>1</sub> x S <sub>2</sub>                                    | S <sub>1</sub> x S <sub>2</sub><br>S <sub>2</sub> x S <sub>3</sub> | S <sub>1</sub> x S <sub>2</sub><br>S <sub>2</sub> x S <sub>3</sub> | S <sub>1</sub> x S <sub>2</sub><br>S <sub>2</sub> x S <sub>3</sub> | S <sub>2</sub> x S <sub>3</sub>                                    | S <sub>2</sub> x S <sub>3</sub>                                    | S <sub>2</sub> x S <sub>3</sub>                                    | S <sub>1</sub> x S <sub>2</sub><br>A <sub>6</sub> order            |
| S <sub>3</sub> derived                | cf | S <sub>1</sub> x S <sub>3</sub>                                    | S <sub>1</sub> x S <sub>3</sub>                                    | S <sub>1</sub> x S <sub>3</sub>                                    | S <sub>2</sub> x S <sub>3</sub>                                    | S <sub>2</sub> x S <sub>3</sub>                                    | S <sub>2</sub> x S <sub>3</sub>                                    | S <sub>1</sub> x S <sub>3</sub><br>S <sub>2</sub> x S <sub>3</sub> | S <sub>1</sub> x S <sub>3</sub><br>S <sub>2</sub> x S <sub>3</sub> | S <sub>1</sub> x S <sub>3</sub><br>S <sub>2</sub> x S <sub>3</sub> | S <sub>1</sub> x S <sub>3</sub>                                    |
|                                       | fi | S <sub>1</sub> x S <sub>3</sub>                                    | S <sub>1</sub> x S <sub>3</sub>                                    | S <sub>1</sub> x S <sub>3</sub>                                    | S <sub>2</sub> x S <sub>3</sub>                                    | S <sub>2</sub> x S <sub>3</sub>                                    | S <sub>2</sub> x S <sub>3</sub>                                    | S <sub>1</sub> x S <sub>3</sub><br>S <sub>2</sub> x S <sub>3</sub> | S <sub>1</sub> x S <sub>3</sub><br>S <sub>2</sub> x S <sub>3</sub> | S <sub>1</sub> x S <sub>3</sub><br>S <sub>2</sub> x S <sub>3</sub> | S <sub>1</sub> x S <sub>3</sub>                                    |
|                                       | ik | S <sub>1</sub> x S <sub>3</sub>                                    | S <sub>1</sub> x S <sub>3</sub>                                    | S <sub>1</sub> x S <sub>3</sub>                                    | S <sub>2</sub> x S <sub>3</sub>                                    | S <sub>2</sub> x S <sub>3</sub>                                    | S <sub>2</sub> x S <sub>3</sub>                                    | S <sub>1</sub> x S <sub>3</sub><br>S <sub>2</sub> x S <sub>3</sub> | S <sub>1</sub> x S <sub>3</sub><br>S <sub>2</sub> x S <sub>3</sub> | S <sub>1</sub> x S <sub>3</sub><br>S <sub>2</sub> x S <sub>3</sub> | S <sub>1</sub> x S <sub>3</sub><br>A <sub>7</sub> order            |
| S <sub>1, S<sub>2</sub></sub> derived | jk | S <sub>1</sub> x S <sub>3</sub>                                    | S <sub>1</sub> x S <sub>3</sub>                                    | S <sub>1</sub> x S <sub>3</sub><br>A <sub>7</sub> order            | S <sub>2</sub> x S <sub>3</sub>                                    | S <sub>2</sub> x S <sub>3</sub>                                    | S <sub>2</sub> x S <sub>3</sub><br>A <sub>6</sub> order            | S <sub>1</sub> x S <sub>3</sub><br>S <sub>2</sub> x S <sub>3</sub> | S <sub>1</sub> x S <sub>3</sub><br>S <sub>2</sub> x S <sub>3</sub> | S <sub>1</sub> x S <sub>3</sub><br>S <sub>2</sub> x S <sub>3</sub> | -                                                                  |

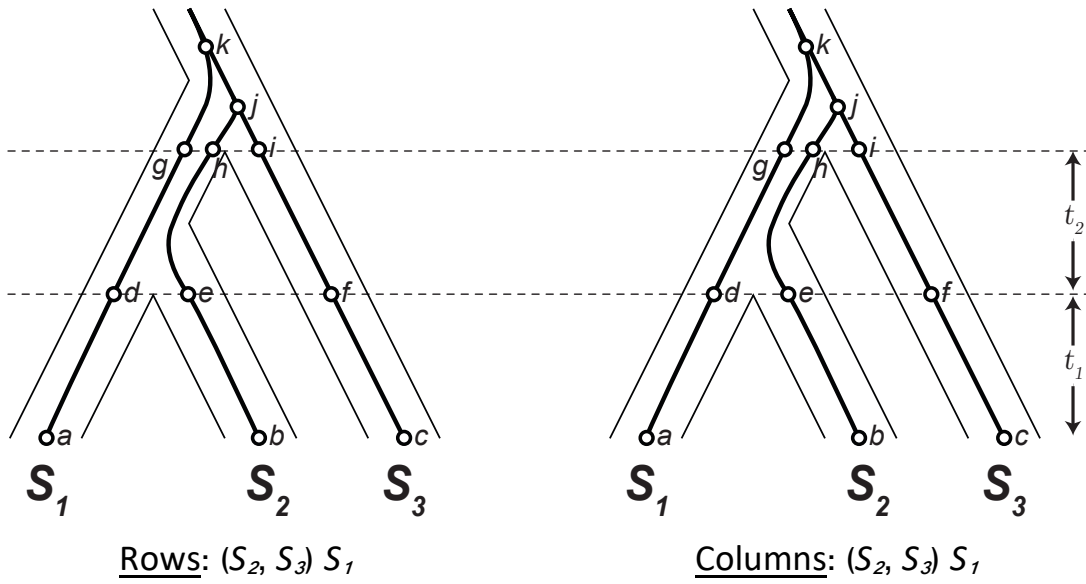

|                                       |    | S <sub>1</sub> derived                                             |                                                                    |                                                                    | S <sub>2</sub> derived                                             |                                                                    |                                                                    | S <sub>3</sub> derived                                             |                                                                    |                                                                    | S <sub>2, S<sub>3</sub></sub> derived                              |
|---------------------------------------|----|--------------------------------------------------------------------|--------------------------------------------------------------------|--------------------------------------------------------------------|--------------------------------------------------------------------|--------------------------------------------------------------------|--------------------------------------------------------------------|--------------------------------------------------------------------|--------------------------------------------------------------------|--------------------------------------------------------------------|--------------------------------------------------------------------|
|                                       |    | ad                                                                 | dg                                                                 | gk                                                                 | be                                                                 | eh                                                                 | hj                                                                 | cf                                                                 | fi                                                                 | ij                                                                 | jk                                                                 |
| S <sub>1</sub> derived                | ad | S <sub>1</sub> x S <sub>2</sub><br>S <sub>1</sub> x S <sub>3</sub> | S <sub>1</sub> x S <sub>2</sub><br>S <sub>1</sub> x S <sub>3</sub> | S <sub>1</sub> x S <sub>2</sub><br>S <sub>1</sub> x S <sub>3</sub> | S <sub>1</sub> x S <sub>2</sub>                                    | S <sub>1</sub> x S <sub>2</sub>                                    | S <sub>1</sub> x S <sub>2</sub>                                    | S <sub>1</sub> x S <sub>3</sub>                                    | S <sub>1</sub> x S <sub>3</sub>                                    | S <sub>1</sub> x S <sub>3</sub>                                    | S <sub>1</sub> x S <sub>2</sub><br>S <sub>1</sub> x S <sub>3</sub> |
|                                       | dg | S <sub>1</sub> x S <sub>2</sub><br>S <sub>1</sub> x S <sub>3</sub> | S <sub>1</sub> x S <sub>2</sub><br>S <sub>1</sub> x S <sub>3</sub> | S <sub>1</sub> x S <sub>2</sub><br>S <sub>1</sub> x S <sub>3</sub> | S <sub>1</sub> x S <sub>2</sub>                                    | S <sub>1</sub> x S <sub>2</sub>                                    | S <sub>1</sub> x S <sub>2</sub>                                    | S <sub>1</sub> x S <sub>3</sub>                                    | S <sub>1</sub> x S <sub>3</sub>                                    | S <sub>1</sub> x S <sub>3</sub>                                    | S <sub>1</sub> x S <sub>2</sub><br>S <sub>1</sub> x S <sub>3</sub> |
|                                       | gk | S <sub>1</sub> x S <sub>2</sub><br>S <sub>1</sub> x S <sub>3</sub> | S <sub>1</sub> x S <sub>2</sub><br>S <sub>1</sub> x S <sub>3</sub> | S <sub>1</sub> x S <sub>2</sub><br>S <sub>1</sub> x S <sub>3</sub> | S <sub>1</sub> x S <sub>2</sub>                                    | S <sub>1</sub> x S <sub>2</sub>                                    | S <sub>1</sub> x S <sub>2</sub>                                    | S <sub>1</sub> x S <sub>3</sub>                                    | S <sub>1</sub> x S <sub>3</sub>                                    | S <sub>1</sub> x S <sub>3</sub>                                    | S <sub>1</sub> x S <sub>2</sub><br>S <sub>1</sub> x S <sub>3</sub> |
| S <sub>2</sub> derived                | be | S <sub>1</sub> x S <sub>2</sub>                                    | S <sub>1</sub> x S <sub>2</sub>                                    | S <sub>1</sub> x S <sub>2</sub>                                    | S <sub>1</sub> x S <sub>2</sub><br>S <sub>2</sub> x S <sub>3</sub> | S <sub>1</sub> x S <sub>2</sub><br>S <sub>2</sub> x S <sub>3</sub> | S <sub>1</sub> x S <sub>2</sub><br>S <sub>2</sub> x S <sub>3</sub> | S <sub>2</sub> x S <sub>3</sub>                                    | S <sub>2</sub> x S <sub>3</sub>                                    | S <sub>2</sub> x S <sub>3</sub>                                    | S <sub>1</sub> x S <sub>2</sub>                                    |
|                                       | eh | S <sub>1</sub> x S <sub>2</sub>                                    | S <sub>1</sub> x S <sub>2</sub>                                    | S <sub>1</sub> x S <sub>2</sub>                                    | S <sub>1</sub> x S <sub>2</sub><br>S <sub>2</sub> x S <sub>3</sub> | S <sub>1</sub> x S <sub>2</sub><br>S <sub>2</sub> x S <sub>3</sub> | S <sub>1</sub> x S <sub>2</sub><br>S <sub>2</sub> x S <sub>3</sub> | S <sub>2</sub> x S <sub>3</sub>                                    | S <sub>2</sub> x S <sub>3</sub>                                    | S <sub>2</sub> x S <sub>3</sub>                                    | S <sub>1</sub> x S <sub>2</sub>                                    |
|                                       | hj | S <sub>1</sub> x S <sub>2</sub>                                    | S <sub>1</sub> x S <sub>2</sub>                                    | S <sub>1</sub> x S <sub>2</sub>                                    | S <sub>1</sub> x S <sub>2</sub><br>S <sub>2</sub> x S <sub>3</sub> | S <sub>1</sub> x S <sub>2</sub><br>S <sub>2</sub> x S <sub>3</sub> | S <sub>1</sub> x S <sub>2</sub><br>S <sub>2</sub> x S <sub>3</sub> | S <sub>2</sub> x S <sub>3</sub>                                    | S <sub>2</sub> x S <sub>3</sub>                                    | S <sub>2</sub> x S <sub>3</sub>                                    | S <sub>1</sub> x S <sub>2</sub><br>A <sub>6</sub> order            |
| S <sub>3</sub> derived                | cf | S <sub>1</sub> x S <sub>3</sub>                                    | S <sub>1</sub> x S <sub>3</sub>                                    | S <sub>1</sub> x S <sub>3</sub>                                    | S <sub>2</sub> x S <sub>3</sub>                                    | S <sub>2</sub> x S <sub>3</sub>                                    | S <sub>2</sub> x S <sub>3</sub>                                    | S <sub>1</sub> x S <sub>3</sub><br>S <sub>2</sub> x S <sub>3</sub> | S <sub>1</sub> x S <sub>3</sub><br>S <sub>2</sub> x S <sub>3</sub> | S <sub>1</sub> x S <sub>3</sub><br>S <sub>2</sub> x S <sub>3</sub> | S <sub>1</sub> x S <sub>3</sub>                                    |
|                                       | fi | S <sub>1</sub> x S <sub>3</sub>                                    | S <sub>1</sub> x S <sub>3</sub>                                    | S <sub>1</sub> x S <sub>3</sub>                                    | S <sub>2</sub> x S <sub>3</sub>                                    | S <sub>2</sub> x S <sub>3</sub>                                    | S <sub>2</sub> x S <sub>3</sub>                                    | S <sub>1</sub> x S <sub>3</sub><br>S <sub>2</sub> x S <sub>3</sub> | S <sub>1</sub> x S <sub>3</sub><br>S <sub>2</sub> x S <sub>3</sub> | S <sub>1</sub> x S <sub>3</sub><br>S <sub>2</sub> x S <sub>3</sub> | S <sub>1</sub> x S <sub>3</sub>                                    |
|                                       | ij | S <sub>1</sub> x S <sub>3</sub>                                    | S <sub>1</sub> x S <sub>3</sub>                                    | S <sub>1</sub> x S <sub>3</sub>                                    | S <sub>2</sub> x S <sub>3</sub>                                    | S <sub>2</sub> x S <sub>3</sub>                                    | S <sub>2</sub> x S <sub>3</sub>                                    | S <sub>1</sub> x S <sub>3</sub><br>S <sub>2</sub> x S <sub>3</sub> | S <sub>1</sub> x S <sub>3</sub><br>S <sub>2</sub> x S <sub>3</sub> | S <sub>1</sub> x S <sub>3</sub><br>S <sub>2</sub> x S <sub>3</sub> | S <sub>1</sub> x S <sub>3</sub><br>A <sub>6</sub> order            |
| S <sub>2, S<sub>3</sub></sub> derived | jk | S <sub>1</sub> x S <sub>2</sub><br>S <sub>1</sub> x S <sub>3</sub> | S <sub>1</sub> x S <sub>2</sub><br>S <sub>1</sub> x S <sub>3</sub> | S <sub>1</sub> x S <sub>2</sub><br>S <sub>1</sub> x S <sub>3</sub> | S <sub>1</sub> x S <sub>2</sub>                                    | S <sub>1</sub> x S <sub>2</sub>                                    | S <sub>1</sub> x S <sub>2</sub><br>A <sub>6</sub> order            | S <sub>1</sub> x S <sub>3</sub>                                    | S <sub>1</sub> x S <sub>3</sub>                                    | S <sub>1</sub> x S <sub>3</sub><br>A <sub>6</sub> order            | S <sub>1</sub> x S <sub>2</sub><br>S <sub>1</sub> x S <sub>3</sub> |



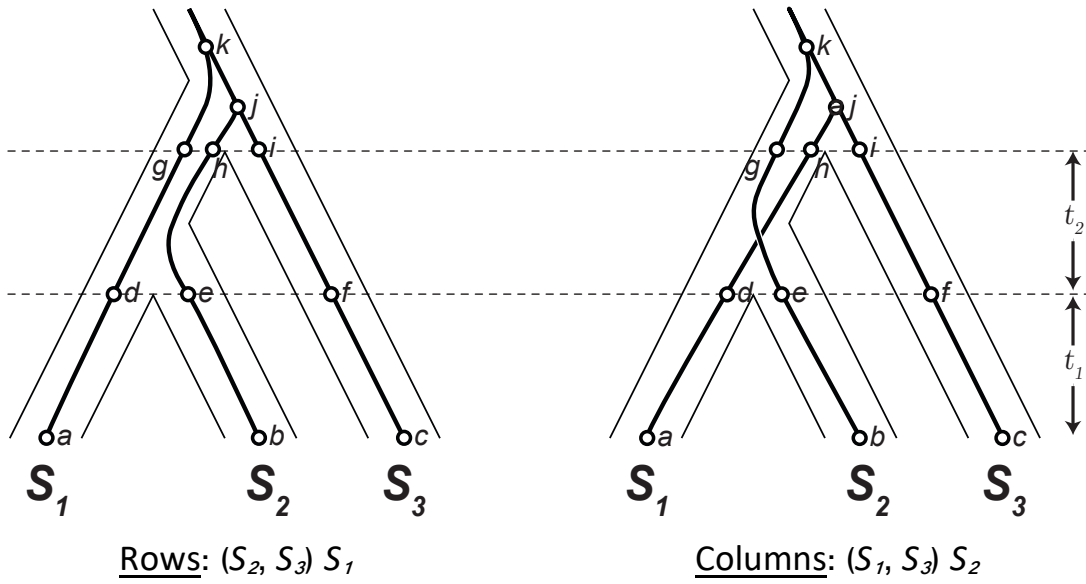

|                                       |    | S <sub>1</sub> derived                                             |                                                                    |                                                                    | S <sub>2</sub> derived                                             |                                                                    |                                                                    | S <sub>3</sub> derived                                             |                                                                    |                                                                    | S <sub>1, S<sub>3</sub></sub> derived                              |
|---------------------------------------|----|--------------------------------------------------------------------|--------------------------------------------------------------------|--------------------------------------------------------------------|--------------------------------------------------------------------|--------------------------------------------------------------------|--------------------------------------------------------------------|--------------------------------------------------------------------|--------------------------------------------------------------------|--------------------------------------------------------------------|--------------------------------------------------------------------|
|                                       |    | ad                                                                 | dh                                                                 | hj                                                                 | be                                                                 | eg                                                                 | gk                                                                 | cf                                                                 | fi                                                                 | ij                                                                 | jk                                                                 |
| S <sub>1</sub> derived                | ad | S <sub>1</sub> x S <sub>2</sub><br>S <sub>1</sub> x S <sub>3</sub> | S <sub>1</sub> x S <sub>2</sub><br>S <sub>1</sub> x S <sub>3</sub> | S <sub>1</sub> x S <sub>2</sub><br>S <sub>1</sub> x S <sub>3</sub> | S <sub>1</sub> x S <sub>2</sub>                                    | S <sub>1</sub> x S <sub>2</sub>                                    | S <sub>1</sub> x S <sub>2</sub>                                    | S <sub>1</sub> x S <sub>3</sub>                                    | S <sub>1</sub> x S <sub>3</sub>                                    | S <sub>1</sub> x S <sub>3</sub>                                    | S <sub>1</sub> x S <sub>2</sub>                                    |
|                                       | dg | S <sub>1</sub> x S <sub>2</sub><br>S <sub>1</sub> x S <sub>3</sub> | S <sub>1</sub> x S <sub>2</sub><br>S <sub>1</sub> x S <sub>3</sub> | S <sub>1</sub> x S <sub>2</sub><br>S <sub>1</sub> x S <sub>3</sub> | S <sub>1</sub> x S <sub>2</sub>                                    | S <sub>1</sub> x S <sub>2</sub>                                    | S <sub>1</sub> x S <sub>2</sub>                                    | S <sub>1</sub> x S <sub>3</sub>                                    | S <sub>1</sub> x S <sub>3</sub>                                    | S <sub>1</sub> x S <sub>3</sub>                                    | S <sub>1</sub> x S <sub>2</sub>                                    |
|                                       | gk | S <sub>1</sub> x S <sub>2</sub><br>S <sub>1</sub> x S <sub>3</sub> | S <sub>1</sub> x S <sub>2</sub><br>S <sub>1</sub> x S <sub>3</sub> | S <sub>1</sub> x S <sub>2</sub><br>S <sub>1</sub> x S <sub>3</sub> | S <sub>1</sub> x S <sub>2</sub>                                    | S <sub>1</sub> x S <sub>2</sub>                                    | S <sub>1</sub> x S <sub>2</sub>                                    | S <sub>1</sub> x S <sub>3</sub>                                    | S <sub>1</sub> x S <sub>3</sub>                                    | S <sub>1</sub> x S <sub>3</sub>                                    | S <sub>1</sub> x S <sub>2</sub><br>A <sub>7</sub> order            |
| S <sub>2</sub> derived                | be | S <sub>1</sub> x S <sub>2</sub>                                    | S <sub>1</sub> x S <sub>2</sub>                                    | S <sub>1</sub> x S <sub>2</sub>                                    | S <sub>1</sub> x S <sub>2</sub><br>S <sub>2</sub> x S <sub>3</sub> | S <sub>1</sub> x S <sub>2</sub><br>S <sub>2</sub> x S <sub>3</sub> | S <sub>1</sub> x S <sub>2</sub><br>S <sub>2</sub> x S <sub>3</sub> | S <sub>2</sub> x S <sub>3</sub>                                    | S <sub>2</sub> x S <sub>3</sub>                                    | S <sub>2</sub> x S <sub>3</sub>                                    | S <sub>1</sub> x S <sub>2</sub><br>S <sub>2</sub> x S <sub>3</sub> |
|                                       | eh | S <sub>1</sub> x S <sub>2</sub>                                    | S <sub>1</sub> x S <sub>2</sub>                                    | S <sub>1</sub> x S <sub>2</sub>                                    | S <sub>1</sub> x S <sub>2</sub><br>S <sub>2</sub> x S <sub>3</sub> | S <sub>1</sub> x S <sub>2</sub><br>S <sub>2</sub> x S <sub>3</sub> | S <sub>1</sub> x S <sub>2</sub><br>S <sub>2</sub> x S <sub>3</sub> | S <sub>2</sub> x S <sub>3</sub>                                    | S <sub>2</sub> x S <sub>3</sub>                                    | S <sub>2</sub> x S <sub>3</sub>                                    | S <sub>1</sub> x S <sub>2</sub><br>S <sub>2</sub> x S <sub>3</sub> |
|                                       | hj | S <sub>1</sub> x S <sub>2</sub>                                    | S <sub>1</sub> x S <sub>2</sub>                                    | S <sub>1</sub> x S <sub>2</sub>                                    | S <sub>1</sub> x S <sub>2</sub><br>S <sub>2</sub> x S <sub>3</sub> | S <sub>1</sub> x S <sub>2</sub><br>S <sub>2</sub> x S <sub>3</sub> | S <sub>1</sub> x S <sub>2</sub><br>S <sub>2</sub> x S <sub>3</sub> | S <sub>2</sub> x S <sub>3</sub>                                    | S <sub>2</sub> x S <sub>3</sub>                                    | S <sub>2</sub> x S <sub>3</sub>                                    | S <sub>1</sub> x S <sub>2</sub><br>S <sub>2</sub> x S <sub>3</sub> |
| S <sub>3</sub> derived                | cf | S <sub>1</sub> x S <sub>3</sub>                                    | S <sub>1</sub> x S <sub>3</sub>                                    | S <sub>1</sub> x S <sub>3</sub>                                    | S <sub>2</sub> x S <sub>3</sub>                                    | S <sub>2</sub> x S <sub>3</sub>                                    | S <sub>2</sub> x S <sub>3</sub>                                    | S <sub>1</sub> x S <sub>3</sub><br>S <sub>2</sub> x S <sub>3</sub> | S <sub>1</sub> x S <sub>3</sub><br>S <sub>2</sub> x S <sub>3</sub> | S <sub>1</sub> x S <sub>3</sub><br>S <sub>2</sub> x S <sub>3</sub> | S <sub>2</sub> x S <sub>3</sub>                                    |
|                                       | fi | S <sub>1</sub> x S <sub>3</sub>                                    | S <sub>1</sub> x S <sub>3</sub>                                    | S <sub>1</sub> x S <sub>3</sub>                                    | S <sub>2</sub> x S <sub>3</sub>                                    | S <sub>2</sub> x S <sub>3</sub>                                    | S <sub>2</sub> x S <sub>3</sub>                                    | S <sub>1</sub> x S <sub>3</sub><br>S <sub>2</sub> x S <sub>3</sub> | S <sub>1</sub> x S <sub>3</sub><br>S <sub>2</sub> x S <sub>3</sub> | S <sub>1</sub> x S <sub>3</sub><br>S <sub>2</sub> x S <sub>3</sub> | S <sub>2</sub> x S <sub>3</sub>                                    |
|                                       | ij | S <sub>1</sub> x S <sub>3</sub>                                    | S <sub>1</sub> x S <sub>3</sub>                                    | S <sub>1</sub> x S <sub>3</sub>                                    | S <sub>2</sub> x S <sub>3</sub>                                    | S <sub>2</sub> x S <sub>3</sub>                                    | S <sub>2</sub> x S <sub>3</sub>                                    | S <sub>1</sub> x S <sub>3</sub><br>S <sub>2</sub> x S <sub>3</sub> | S <sub>1</sub> x S <sub>3</sub><br>S <sub>2</sub> x S <sub>3</sub> | S <sub>1</sub> x S <sub>3</sub><br>S <sub>2</sub> x S <sub>3</sub> | S <sub>2</sub> x S <sub>3</sub><br>A <sub>6</sub> order            |
| S <sub>2, S<sub>3</sub></sub> derived | jk | S <sub>1</sub> x S <sub>2</sub><br>S <sub>1</sub> x S <sub>3</sub> | S <sub>1</sub> x S <sub>2</sub><br>S <sub>1</sub> x S <sub>3</sub> | S <sub>1</sub> x S <sub>2</sub><br>S <sub>1</sub> x S <sub>3</sub> | S <sub>1</sub> x S <sub>2</sub>                                    | S <sub>1</sub> x S <sub>2</sub>                                    | S <sub>1</sub> x S <sub>2</sub><br>A <sub>7</sub> order            | S <sub>1</sub> x S <sub>3</sub>                                    | S <sub>1</sub> x S <sub>3</sub>                                    | S <sub>1</sub> x S <sub>3</sub><br>A <sub>6</sub> order            | -                                                                  |

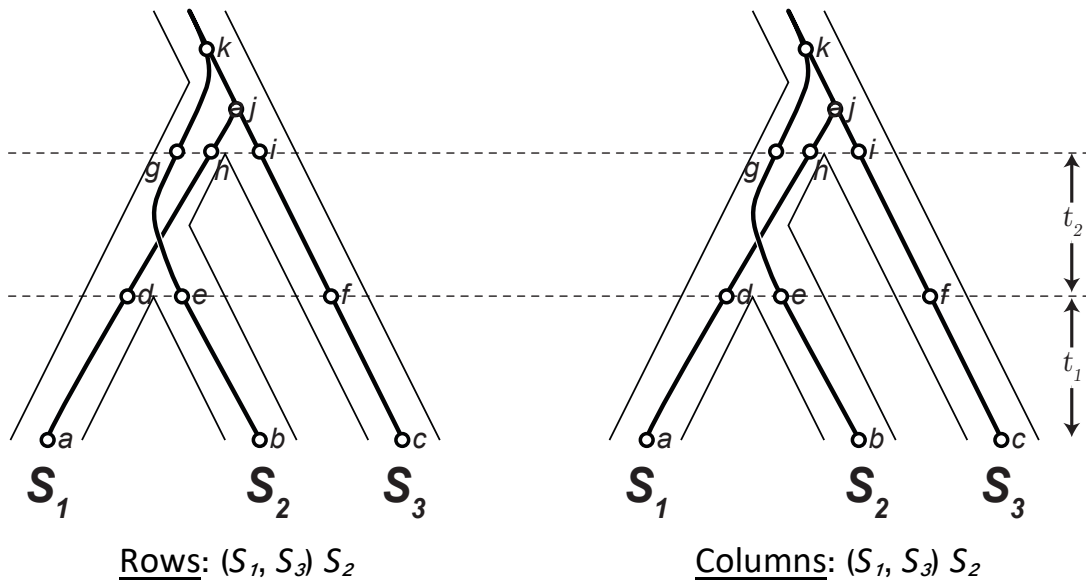

|                                         |    | S <sub>1</sub> derived                                             |                                                                    |                                                                    | S <sub>2</sub> derived                                             |                                                                    |                                                                    | S <sub>3</sub> derived                                             |                                                                    |                                                                    | S <sub>1</sub> , S <sub>3</sub> derived                            |
|-----------------------------------------|----|--------------------------------------------------------------------|--------------------------------------------------------------------|--------------------------------------------------------------------|--------------------------------------------------------------------|--------------------------------------------------------------------|--------------------------------------------------------------------|--------------------------------------------------------------------|--------------------------------------------------------------------|--------------------------------------------------------------------|--------------------------------------------------------------------|
|                                         |    | ad                                                                 | dh                                                                 | hj                                                                 | be                                                                 | eg                                                                 | gk                                                                 | cf                                                                 | fi                                                                 | ij                                                                 | jk                                                                 |
| S <sub>1</sub> derived                  | ad | S <sub>1</sub> x S <sub>2</sub><br>S <sub>1</sub> x S <sub>3</sub> | S <sub>1</sub> x S <sub>2</sub><br>S <sub>1</sub> x S <sub>3</sub> | S <sub>1</sub> x S <sub>2</sub><br>S <sub>1</sub> x S <sub>3</sub> | S <sub>1</sub> x S <sub>2</sub>                                    | S <sub>1</sub> x S <sub>2</sub>                                    | S <sub>1</sub> x S <sub>2</sub>                                    | S <sub>1</sub> x S <sub>3</sub>                                    | S <sub>1</sub> x S <sub>3</sub>                                    | S <sub>1</sub> x S <sub>3</sub>                                    | S <sub>1</sub> x S <sub>2</sub>                                    |
|                                         | dh | S <sub>1</sub> x S <sub>2</sub><br>S <sub>1</sub> x S <sub>3</sub> | S <sub>1</sub> x S <sub>2</sub><br>S <sub>1</sub> x S <sub>3</sub> | S <sub>1</sub> x S <sub>2</sub><br>S <sub>1</sub> x S <sub>3</sub> | S <sub>1</sub> x S <sub>2</sub>                                    | S <sub>1</sub> x S <sub>2</sub>                                    | S <sub>1</sub> x S <sub>2</sub>                                    | S <sub>1</sub> x S <sub>3</sub>                                    | S <sub>1</sub> x S <sub>3</sub>                                    | S <sub>1</sub> x S <sub>3</sub>                                    | S <sub>1</sub> x S <sub>2</sub>                                    |
|                                         | hj | S <sub>1</sub> x S <sub>2</sub><br>S <sub>1</sub> x S <sub>3</sub> | S <sub>1</sub> x S <sub>2</sub><br>S <sub>1</sub> x S <sub>3</sub> | S <sub>1</sub> x S <sub>2</sub><br>S <sub>1</sub> x S <sub>3</sub> | S <sub>1</sub> x S <sub>2</sub>                                    | S <sub>1</sub> x S <sub>2</sub>                                    | S <sub>1</sub> x S <sub>2</sub>                                    | S <sub>1</sub> x S <sub>3</sub>                                    | S <sub>1</sub> x S <sub>3</sub>                                    | S <sub>1</sub> x S <sub>3</sub>                                    | S <sub>1</sub> x S <sub>2</sub><br>A <sub>6</sub> order            |
| S <sub>2</sub> derived                  | be | S <sub>1</sub> x S <sub>2</sub>                                    | S <sub>1</sub> x S <sub>2</sub>                                    | S <sub>1</sub> x S <sub>2</sub>                                    | S <sub>1</sub> x S <sub>2</sub><br>S <sub>2</sub> x S <sub>3</sub> | S <sub>1</sub> x S <sub>2</sub><br>S <sub>2</sub> x S <sub>3</sub> | S <sub>1</sub> x S <sub>2</sub><br>S <sub>2</sub> x S <sub>3</sub> | S <sub>2</sub> x S <sub>3</sub>                                    | S <sub>2</sub> x S <sub>3</sub>                                    | S <sub>2</sub> x S <sub>3</sub>                                    | S <sub>1</sub> x S <sub>2</sub><br>S <sub>2</sub> x S <sub>3</sub> |
|                                         | eg | S <sub>1</sub> x S <sub>2</sub>                                    | S <sub>1</sub> x S <sub>2</sub>                                    | S <sub>1</sub> x S <sub>2</sub>                                    | S <sub>1</sub> x S <sub>2</sub><br>S <sub>2</sub> x S <sub>3</sub> | S <sub>1</sub> x S <sub>2</sub><br>S <sub>2</sub> x S <sub>3</sub> | S <sub>1</sub> x S <sub>2</sub><br>S <sub>2</sub> x S <sub>3</sub> | S <sub>2</sub> x S <sub>3</sub>                                    | S <sub>2</sub> x S <sub>3</sub>                                    | S <sub>2</sub> x S <sub>3</sub>                                    | S <sub>1</sub> x S <sub>2</sub><br>S <sub>2</sub> x S <sub>3</sub> |
|                                         | gk | S <sub>1</sub> x S <sub>2</sub>                                    | S <sub>1</sub> x S <sub>2</sub>                                    | S <sub>1</sub> x S <sub>2</sub>                                    | S <sub>1</sub> x S <sub>2</sub><br>S <sub>2</sub> x S <sub>3</sub> | S <sub>1</sub> x S <sub>2</sub><br>S <sub>2</sub> x S <sub>3</sub> | S <sub>1</sub> x S <sub>2</sub><br>S <sub>2</sub> x S <sub>3</sub> | S <sub>2</sub> x S <sub>3</sub>                                    | S <sub>2</sub> x S <sub>3</sub>                                    | S <sub>2</sub> x S <sub>3</sub>                                    | S <sub>1</sub> x S <sub>2</sub><br>S <sub>2</sub> x S <sub>3</sub> |
| S <sub>3</sub> derived                  | cf | S <sub>1</sub> x S <sub>3</sub>                                    | S <sub>1</sub> x S <sub>3</sub>                                    | S <sub>1</sub> x S <sub>3</sub>                                    | S <sub>2</sub> x S <sub>3</sub>                                    | S <sub>2</sub> x S <sub>3</sub>                                    | S <sub>2</sub> x S <sub>3</sub>                                    | S <sub>1</sub> x S <sub>3</sub><br>S <sub>2</sub> x S <sub>3</sub> | S <sub>1</sub> x S <sub>3</sub><br>S <sub>2</sub> x S <sub>3</sub> | S <sub>1</sub> x S <sub>3</sub><br>S <sub>2</sub> x S <sub>3</sub> | S <sub>2</sub> x S <sub>3</sub>                                    |
|                                         | fi | S <sub>1</sub> x S <sub>3</sub>                                    | S <sub>1</sub> x S <sub>3</sub>                                    | S <sub>1</sub> x S <sub>3</sub>                                    | S <sub>2</sub> x S <sub>3</sub>                                    | S <sub>2</sub> x S <sub>3</sub>                                    | S <sub>2</sub> x S <sub>3</sub>                                    | S <sub>1</sub> x S <sub>3</sub><br>S <sub>2</sub> x S <sub>3</sub> | S <sub>1</sub> x S <sub>3</sub><br>S <sub>2</sub> x S <sub>3</sub> | S <sub>1</sub> x S <sub>3</sub><br>S <sub>2</sub> x S <sub>3</sub> | S <sub>2</sub> x S <sub>3</sub>                                    |
|                                         | ij | S <sub>1</sub> x S <sub>3</sub>                                    | S <sub>1</sub> x S <sub>3</sub>                                    | S <sub>1</sub> x S <sub>3</sub>                                    | S <sub>2</sub> x S <sub>3</sub>                                    | S <sub>2</sub> x S <sub>3</sub>                                    | S <sub>2</sub> x S <sub>3</sub>                                    | S <sub>1</sub> x S <sub>3</sub><br>S <sub>2</sub> x S <sub>3</sub> | S <sub>1</sub> x S <sub>3</sub><br>S <sub>2</sub> x S <sub>3</sub> | S <sub>1</sub> x S <sub>3</sub><br>S <sub>2</sub> x S <sub>3</sub> | S <sub>2</sub> x S <sub>3</sub><br>A <sub>6</sub> order            |
| S <sub>1</sub> , S <sub>3</sub> derived | jk | S <sub>1</sub> x S <sub>2</sub>                                    | S <sub>1</sub> x S <sub>2</sub>                                    | S <sub>1</sub> x S <sub>2</sub><br>A <sub>6</sub> order            | S <sub>1</sub> x S <sub>2</sub><br>S <sub>2</sub> x S <sub>3</sub> | S <sub>1</sub> x S <sub>2</sub><br>S <sub>2</sub> x S <sub>3</sub> | S <sub>1</sub> x S <sub>2</sub><br>S <sub>2</sub> x S <sub>3</sub> | S <sub>2</sub> x S <sub>3</sub>                                    | S <sub>2</sub> x S <sub>3</sub>                                    | S <sub>2</sub> x S <sub>3</sub><br>A <sub>6</sub> order            | S <sub>1</sub> x S <sub>2</sub><br>S <sub>2</sub> x S <sub>3</sub> |
