# Supplementary material for: Speciation genes are more likely to have discordant gene trees
Source: PubMed Central journal article supplement (PMC6121824; doi:10.1002/evl3.77), 2018-08-08
Supplement: EVL3-2-281-s017.pdf [file EVL3-2-281-s017.pdf]

## Supplemental Methods

### *Probability of a mutation on a branch segment*

Assuming mutations are rare, the probability of a mutation on a particular branch segment, i.e.  $x_\alpha$  and  $y_\beta$ , is proportional to the length of that segment (Hudson 1992). The probability of a mutation can be estimated as the probability for at least one mutation on the given segment, with no mutations on the rest of the tree,

$$\begin{aligned} P(\text{mutation on } x_\alpha) &= [1 - e^{-2N_e\mu \cdot L(x_\alpha)}][e^{-2N_e\mu \sum_\alpha L(x_\alpha)}] \\ &= [1 - (1 - 2N_e\mu \cdot L(x_\alpha) + O(\mu^2))][1 - 2N_e\mu \sum_\alpha L(x_\alpha) + O(\mu^2)] \\ &\approx 2N_e\mu \cdot L(x_\alpha) \end{aligned} \quad (\text{S1})$$

where  $2N_e\mu$  is the population mutation parameter,  $L(x_\alpha)$  is the length of branch segment  $x_\alpha$ , and a Taylor series approximation has been made to remove terms of order  $\mu^2$  and higher.

### *Mutation order for (S<sub>1</sub>, S<sub>2</sub>) S<sub>3</sub> int. gene trees*

Let  $\tau_1$  be a random variable representing the time from the  $S_1, S_2$  divergence to the first mutation on segment  $g-h$  on the first tree. Let  $v_1$  and  $v_2$  be random variables representing the time from the  $S_1, S_2$  divergence to the most recent coalescence on the first and second tree, respectively. The first mutation on segment  $g-h$  is unconstrained and its probability remains  $t_2 - q(t_2)$ . The second mutation on segment  $d-g$  is constrained by both the timing of the first mutation as well as the timing of the coalescence event at one end of the segment (see Fig. S9). If the mutation on the first tree occurs before the coalescence on the second tree, the second mutation can arise on the entire length of the  $d-g$  segment, up to time  $v_2$ . If the coalescence on the second tree occurs before the first mutation, the second mutation may only arise on the truncated  $d-g$  segment, up to length  $\tau_1$ . The probability of an incompatible mutation arising on  $d-g$  is the expected length,

$$P(I \text{ mutation on } d-g) = P(\tau_1 > v_2)E[v_2 | \tau_1 > v_2] + P(\tau_1 < v_2)E[\tau_1 | \tau_1 < v_2] \quad (\text{S2})$$

Let  $f_v$  be the probability distribution function for  $v_1$  and  $v_2$  (as described earlier in Equation 11; main text), and  $f_\tau$  be the probability distribution function for  $\tau_1$ . Because we assume only a single mutation occurs on segment  $g-h$ , the probability of  $\tau_1$  is uniformly distributed along its length,

$t_2 - v_1$ . The probability distribution function,  $f_\tau$  is then

$$f_\tau(t) = \int_0^t \frac{1}{t_2 - x} f_v(x) dx \quad (\text{S3})$$

The conditional expectations can thus be expressed as

$$E[\tau_1 | \tau_1 < v_2] = \int_0^{t_2} t f_\tau(t) \left[ \int_t^{t_2} \frac{f_v(x) dx}{P(\tau_1 < v_2)} \right] dt$$

$$E[v_2 | \tau_1 > v_2] = \int_0^{t_2} t f_v(t) \left[ \int_t^{t_2} \frac{f_\tau(x) dx}{P(\tau_1 > v_2)} \right] dt$$

When these expectations are substituted into Equation S2, the probability of an incompatible mutation arising on  $d-g$  becomes,

$$P(I \text{ mutation on } d-g) = \int_0^{t_2} t f_v(t) \left[ \int_t^{t_2} f_\tau(x) dx \right] dt + \int_0^{t_2} t f_\tau(t) \left[ \int_t^{t_2} f_v(x) dx \right] dt \quad (S4)$$

The probability of an incompatibility between these segments can be calculated from the product of the unconstrained mutation probability on segment  $g-h$ ,  $t_2 - q(t_2)$ , and Equation S4. Since segments  $d-g$  and  $g-h$  exist on both trees, this product contributes twice to the probability of a derived-ancestral incompatibility when both loci have  $(S_1, S_2) S_3$  int. trees.

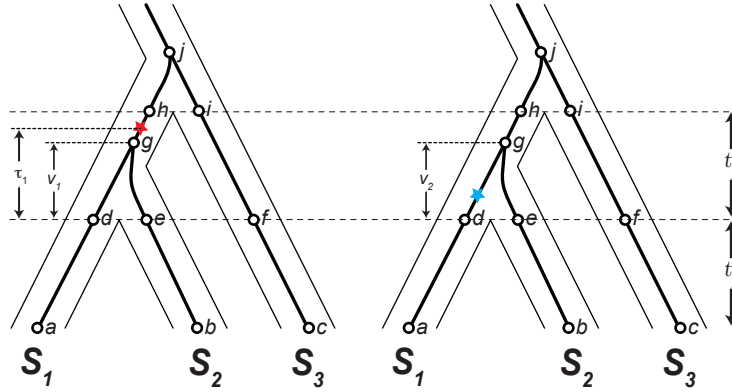

**Figure S12.** Calculating constraints on derived-ancestral incompatibilities due to mutation order on a pair of  $(S_1, S_2) S_3$  int. trees.

While this figure shows the mutation on the left tree, marked by the red star, as occurring first, this is not always true. Because  $v_1$ ,  $v_2$ , and  $\tau_1$  are all random variables, it is possible for the mutation on the second tree, marked by the blue star, to be the first mutation.

#### *Mutation order for incompatibilities that arise ancestrally*

As previously noted, there are a number of branch segments with ambiguous endpoints in the ancestral population, forcing us to consider mutation order for derived-ancestral incompatibilities when incompatible alleles are allowed to arise before divergence. These calculations follow Eqs. S2 and S4; the timing of the first mutation restricts the length of the segment on which the second mutation may occur. Let  $\lambda_{Ai}$  be a random variable representing the length of the segment on which an unrestricted second mutation might occur for a pattern of branch segment asymmetry,  $A_i$ . Let  $\tau_{Ai}$  be a random variable representing the time from the oldest divergence to the first mutation for this asymmetry pattern. The probability of the first

mutation is unrestricted and equal to the expected length of the first branch segment. The probability of the second mutation depends on whether the first mutation precedes the coalescence of the second branch segment and can be expressed as

$$P(\mu_2) = P(\tau_{Ai} > \lambda_{Ai})E[\lambda_{Ai}|\tau_{Ai} > \lambda_{Ai}] + P(\tau_{Ai} < \lambda_{Ai})E[\tau_{Ai}|\tau_{Ai} < \lambda_{Ai}] \quad (S5)$$

Branch segments with mutation order asymmetry affecting the probability of derived-ancestral incompatibilities are labeled with their respective asymmetry patterns in Appendix 2. The probability distribution functions for  $\lambda_{Ai}$  can be calculated from the time to coalescence for three-to-two and two-to-one lineages. Similarly,  $\tau_{Ai}$  can be calculated from the convolution of these functions and the probability distribution function for a mutation uniformly distributed along the appropriate branch. The probability distribution functions for  $\lambda_{Ai}$  and  $\tau_{Ai}$ , as well as  $P(\mu_1)$  and  $P(\mu_2)$ , are listed for each asymmetry pattern in Table S1.

We modify Equation 13 (main text) to calculate the probability of concordance with polymorphic incompatibilities. Let  $\mathbf{1R}_{T_x, T_y}$  be the indicator matrix for segments on trees  $T_x$  and  $T_y$ , whose elements are 1 when the segment combination can lead to an incompatibility and 0 otherwise. Let  $\mathbf{A}_{T_x, T_y}$  be a matrix whose elements are the probabilities for a derived-ancestral incompatibility that depends on mutation order (i.e.  $P(\mu_1) \cdot P(\mu_2)$  for that segment combination). The probability of an incompatibility with isolation pattern  $I$ , conditioned on gene trees  $T_x$  and  $T_y$ , is then

$$P(I|T_x, T_y) = p \left( B_{T_x} \mathbf{1R}_{T_x, T_y} B_{T_y} - B_{T_x} \mathbf{1}_{\mathbf{A}_{T_x, T_y}} B_{T_y} + \mathbf{A}_{T_x, T_y} \circ \mathbf{1R}_{T_x, T_y} \right) \quad (S6)$$

where  $\mathbf{1}_{\mathbf{A}_{T_x, T_y}}$  is a matrix whose elements are 1 for non-zero entries of  $\mathbf{A}_{T_x, T_y}$  and 0 otherwise.

As before, we can form the 4x4 matrix,  $\mathbf{D}(I)$ , for each isolation pattern  $I$  from Equation S6, and calculate concordance probabilities from Equation 4 (main text).

**Table S1.** Probabilities for incompatibility-participating mutations that depend on mutation order. Note that patterns A<sub>2</sub> and A<sub>5</sub> correspond to calculations from Eqs. 16 (main text) and S4 respectively.

| Pattern        | $f_{\lambda_{Ai}}(t)$           | $f_{\tau_{Ai}}(t)$                                                          | $P(\mu_1)$     | $P(\mu_2)$                            |
|----------------|---------------------------------|-----------------------------------------------------------------------------|----------------|---------------------------------------|
| A <sub>1</sub> | $e^{-t}$                        | $\int_0^t 3e^{-3(t-s)} \left[ \int_s^\infty \frac{e^{-x}}{x} dx \right] ds$ | 1              | $1 - \frac{3}{4} \log(2)$             |
| A <sub>2</sub> | 1 for $t = t_2$                 | $\int_0^t \frac{1}{t_2 - x} f_v(x) dx$                                      | $t_2 - q(t_2)$ | $\frac{1}{2}(t_2 + q(t_2))$           |
| A <sub>3</sub> | $\frac{3}{2}(e^{-t} - e^{-3t})$ | $\int_t^\infty \frac{e^{-x}}{x} dx$                                         | 1              | $\frac{4}{3} - \frac{25}{18} \log(2)$ |
| A <sub>4</sub> | $3e^{-3t}$                      | $\int_t^\infty \frac{e^{-x}}{x} dx$                                         | 1              | $\frac{1}{3} - \frac{1}{9} \log(4)$   |
| A <sub>5</sub> | $f_v(t)$                        | $\int_0^t \frac{1}{t_2 - x} f_v(x) dx$                                      | $t_2 - q(t_2)$ | (see Eq. S4)                          |
| A <sub>6</sub> | $3e^{-3t}$                      | $\int_0^t 3e^{-3(t-s)} \left[ \int_s^\infty \frac{e^{-x}}{x} dx \right] ds$ | 1              | $\frac{1}{3} - \frac{1}{9} \log(2)$   |
| A <sub>7</sub> | $\frac{3}{2}(e^{-t} - e^{-3t})$ | $\int_0^t 3e^{-3(t-s)} \left[ \int_s^\infty \frac{e^{-x}}{x} dx \right] ds$ | 1              | $\frac{4}{3} - \frac{77}{72} \log(2)$ |
